# Supplementary material for: Bio-guided isolation of alpha-glucosidase inhibitory compounds from Vietnamese liverwort Marchantia polymorpha: in vitro and in silico studies
Source: Royal Society of Chemistry journal article supplement (doi:10.1039/d3ra07503f), 2023-01-01
Supplement: d3ra07503f1.pdf [file d3ra07503f1.pdf]

**Table S-1.**  $^1\text{H}$  NMR (500 MHz,  $\delta_{\text{H}}$ , multi, ( $J$  in Hz) and  $^{13}\text{C}$  NMR (125 MHz) data of compound **1** in  $\text{CDCl}_3$

| No. | <b>1</b>                                          |                                                      | <b>Marchantin A</b>                               |                                                      |
|-----|---------------------------------------------------|------------------------------------------------------|---------------------------------------------------|------------------------------------------------------|
|     | $^1\text{H}$ -NMR<br>( $\text{CDCl}_3$ , 500 MHz) | $^{13}\text{C}$ -NMR<br>( $\text{CDCl}_3$ , 125 MHz) | $^1\text{H}$ -NMR<br>( $\text{CDCl}_3$ , 500 MHz) | $^{13}\text{C}$ -NMR<br>( $\text{CDCl}_3$ , 125 MHz) |
| 1   | –                                                 | 153.2                                                | –                                                 | 152.9                                                |
| 2   | 6.57 (1H, <i>d</i> , 8.0)                         | 121.2                                                | 6.58 (1H, <i>d</i> , 8.5)                         | 121.2                                                |
| 3   | 6.91 (1H, <i>d</i> , 8.5)                         | 129.6                                                | 6.93 (1H, <i>d</i> , 8.5)                         | 129.5                                                |
| 4   | –                                                 | 139.1                                                | –                                                 | 139.0                                                |
| 5   | 6.91 (1H, <i>d</i> , 8.5)                         | 129.6                                                | 6.93 (1H, <i>d</i> , 8.5)                         | 129.5                                                |
| 6   | 6.57 (1H, <i>d</i> , 8.0)                         | 121.2                                                | 6.58 (1H, <i>d</i> , 8.5)                         | 121.2                                                |
| 7   | 2.97–3.01 (2H, <i>m</i> )                         | 35.3                                                 | 2.96–3.01 (2H, <i>m</i> )                         | 35.2                                                 |
| 8   | 2.97–3.01 (2H, <i>m</i> )                         | 30.3                                                 | 2.96–3.01 (2H, <i>m</i> )                         | 30.2                                                 |
| 9   | –                                                 | 136.2                                                | –                                                 | 136.1                                                |
| 10  | 7.00 (1H, <i>dd</i> , 8.0, 1.5)                   | 121.9                                                | 7.02 (1H, <i>dd</i> , 7.8, 1.5)                   | 121.9                                                |
| 11  | 7.13 (1H, <i>dd</i> , 8.0, 7.5)                   | 126.0                                                | 7.15 (1H, <i>t</i> , 7.8)                         | 126.0                                                |
| 12  | 6.85 (1H, <i>dd</i> , 8.0, 1.5)                   | 114.4                                                | 6.87 (1H, <i>dd</i> , 7.8, 1.5)                   | 114.3                                                |
| 13  | –                                                 | 148.7                                                | –                                                 | 148.6                                                |
| 14  | –                                                 | 139.7                                                | –                                                 | 139.6                                                |
| 1'  | –                                                 | 130.8                                                | –                                                 | 130.6                                                |
| 2'  | –                                                 | 146.5                                                | –                                                 | 146.4                                                |
| 3'  | 5.13 (1H, <i>d</i> , 1.5)                         | 107.9                                                | 5.13 (1H, <i>d</i> , 2.0)                         | 107.9                                                |
| 4'  | –                                                 | 132.5                                                | –                                                 | 132.4                                                |
| 5'  | 6.46 (1H, <i>d</i> , 1.5)                         | 109.3                                                | 6.47 (1H, <i>d</i> , 2.0)                         | 109.3                                                |
| 6'  | –                                                 | 144.3                                                | –                                                 | 144.1                                                |
| 7'  | 2.78–2.80 (2H, <i>m</i> )                         | 34.1                                                 | 2.72–2.78 (2H, <i>m</i> )                         | 34.0                                                 |
| 8'  | 2.72–2.74 (2H, <i>m</i> )                         | 35.5                                                 | 2.72–2.78 (2H, <i>m</i> )                         | 35.4                                                 |
| 9'  | –                                                 | 143.1                                                | –                                                 | 143.0                                                |
| 10' | 6.57 (1H, <i>dd</i> , 2.5, 2.0)                   | 115.5                                                | 6.85 (1H, <i>t</i> , 2.0)                         | 115.4                                                |
| 11' | –                                                 | 156.8                                                | –                                                 | 156.6                                                |
| 12' | 6.53 (1H, <i>dd</i> , 8.5, 2.0)                   | 112.0                                                | 6.55 (1H, <i>dd</i> , 7.8, 2.1)                   | 112.0                                                |
| 13' | 6.97 (1H, <i>t</i> , 7.8)                         | 128.9                                                | 6.98 (1H, <i>t</i> , 7.8)                         | 128.8                                                |
| 14' | 6.39 (1H, <i>brd</i> , 7.5)                       | 123.2                                                | 6.41 (1H, <i>brd</i> , 7.8)                       | 123.1                                                |

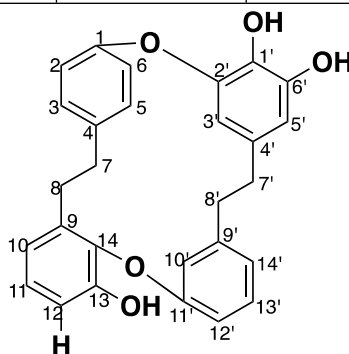

**Marchantin A**

**Table S-2.**  $^1\text{H}$  NMR (500 MHz,  $\delta_{\text{H}}$ , multi, ( $J$  in Hz) and  $^{13}\text{C}$  NMR (125 MHz) data of compound **2** in  $\text{CDCl}_3$

| No. | <b>2</b>                                        |                                                       | <b>Riccardin C</b>                                |                                                         |
|-----|-------------------------------------------------|-------------------------------------------------------|---------------------------------------------------|---------------------------------------------------------|
|     | $^1\text{H}$ -NMR<br>(Acetone- $d_6$ , 500 MHz) | $^{13}\text{C}$ -NMR<br>(Acetone- $d_6$ ,<br>125 MHz) | $^1\text{H}$ -NMR<br>( $\text{CDCl}_3$ , 500 MHz) | $^{13}\text{C}$ -NMR<br>( $\text{CDCl}_3$ ,<br>125 MHz) |
| 1   | –                                               | 154.4                                                 | –                                                 | 152.5                                                   |
| 2   | 6.73 (1H, <i>m</i> )                            | 122.9                                                 | 6.72 – 6.80 <sup>b</sup>                          | 122.3                                                   |
| 3   | 6.95 (1H, <i>d</i> , 8.0)                       | 130.3                                                 | 6.87 ( <i>brs</i> )                               | 129.2                                                   |
| 4   | –                                               | 140.8                                                 | –                                                 | 139.8                                                   |
| 5   | 6.95 (1H, <i>d</i> , 8.0)                       | 130.3                                                 | 6.87 ( <i>brs</i> )                               | 129.2                                                   |
| 6   | 6.73 (1H, <i>m</i> )                            | 122.9                                                 | 6.72 – 6.80 <sup>b</sup>                          | 122.3                                                   |
| 7   | 2.63-3.03                                       | 38.7                                                  | 2.88 ( <i>m</i> )                                 | 38.1                                                    |
|     |                                                 |                                                       | 2.95 ( <i>m</i> )                                 | 36.1                                                    |
| 8   |                                                 | 36.0                                                  | 2.23 – 2.75 <sup>b</sup>                          | 35.0                                                    |
|     |                                                 |                                                       | 3.03 ( <i>m</i> )                                 | 117.5                                                   |
| 9   | –                                               | 144.3                                                 | –                                                 | 143.7                                                   |
| 10  | 6.93 (1H, <i>m</i> )                            | 117.7                                                 | 6.96 ( <i>d</i> , 2.9)                            | 117.5                                                   |
| 11  | –                                               | 157.8                                                 | –                                                 | 155.9                                                   |
| 12  | 6.73 (1H, <i>m</i> )                            | 114.0                                                 | 6.79 ( <i>dd</i> , 8.6, 2.9)                      | 114.3                                                   |
| 13  | 7.03 (1H, <i>d</i> , 8.0)                       | 133.4                                                 | 7.03 ( <i>d</i> , 8.6)                            | 132.8                                                   |
| 14  | –                                               | 128.9                                                 | –                                                 | 128.2                                                   |
| 1'  | –                                               | 145.4                                                 | –                                                 | 143.7                                                   |
| 2'  | –                                               | 148.0                                                 | –                                                 | 146.3                                                   |
| 3'  | 5.36 (1H, <i>d</i> , 1.5)                       | 117.4                                                 | 5.35 ( <i>d</i> , 2.0)                            | 116.0                                                   |
| 4'  | –                                               | 133.5                                                 | –                                                 | 133.1                                                   |
| 5'  | 6.50 (1H, <i>m</i> )                            | 121.5                                                 | 6.73 ( <i>dd</i> , 8.1, 2.0)                      | 122.1                                                   |
| 6'  | 6.72 (1H, <i>d</i> , 8.0)                       | 116.6                                                 | 6.92 ( <i>d</i> , 8.1)                            | 114.9                                                   |
| 7'  | 2.63-3.03                                       | 37.9                                                  | 2.23 – 2.75 <sup>b</sup>                          | 37.1                                                    |
| 8'  |                                                 | 38.5                                                  | 2.23 – 2.75 <sup>b</sup>                          | 37.6                                                    |
| 9'  | –                                               | 141.8                                                 | –                                                 | 141.9                                                   |
| 10' | 6.13 (1H, <i>d</i> , 8.0, 2.0)                  | 122.7                                                 | 6.23 ( <i>dd</i> , 7.8, 1.7)                      | 121.7                                                   |
| 11' | 6.77 (1H, <i>d</i> , 8.0)                       | 133.1                                                 | 6.77 ( <i>d</i> , 7.8)                            | 131.4                                                   |
| 12' | –                                               | 126.8                                                 | –                                                 | 124.4                                                   |
| 13' | –                                               | 154.1                                                 | –                                                 | 151.8                                                   |
| 14' | 6.36 (1H, <i>d</i> , 1.5)                       | 117.0                                                 | 6.39 ( <i>d</i> , 1.7)                            | 116.0                                                   |

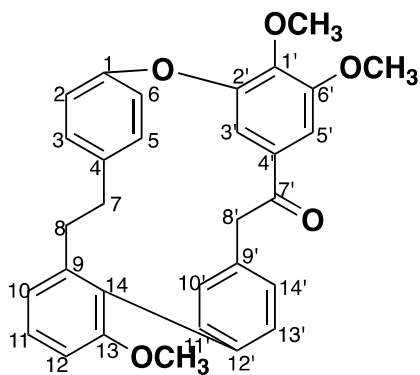

**Riccardin C**

**Table S-3.**  $^1\text{H}$  NMR (500 MHz,  $\delta_{\text{H}}$ , multi, ( $J$  in Hz) and  $^{13}\text{C}$  NMR (125 MHz) data of compound **3** in acetone- $d_6$ .

| No. | <b>3</b>                                        |                                                       | <b>Isoriccardin C</b>                             |                                                         |
|-----|-------------------------------------------------|-------------------------------------------------------|---------------------------------------------------|---------------------------------------------------------|
|     | $^1\text{H}$ -NMR<br>(Acetone- $d_6$ , 500 MHz) | $^{13}\text{C}$ -NMR<br>(Acetone- $d_6$ ,<br>125 MHz) | $^1\text{H}$ -NMR<br>( $\text{CDCl}_3$ , 500 MHz) | $^{13}\text{C}$ -NMR<br>( $\text{CDCl}_3$ ,<br>125 MHz) |
| 1   | –                                               | 155.5                                                 | –                                                 | 153.2                                                   |
| 2   | 6.82 (1H, <i>d</i> , 8.5)                       | 122.1                                                 | 6.84 (1H, <i>dd</i> , 8.3, 1.7)                   | 121.7                                                   |
| 3   | 7.10 (1H, <i>dd</i> , 7.5, 2.5)                 | 131.9                                                 | 7.08 (1H, <i>dd</i> , 8.3, 1.7)                   | 130.8                                                   |
| 4   | –                                               | 138.1                                                 | –                                                 | 137.2                                                   |
| 5   | 7.13 (1H, <i>dd</i> , 7.5, 2.5)                 | 131.4                                                 | 7.13 (1H, <i>dd</i> , 8.3, 1.7)                   | 130.3                                                   |
| 6   | 6.81 (1H, <i>d</i> , 8.5)                       | 122.1                                                 | 6.89 (1H, <i>dd</i> , 8.3, 1.7)                   | 121.7                                                   |
| 7   | 3.02-3.16 (4H, <i>m</i> )                       | 35.4                                                  | 3.13 (4H, <i>m</i> )                              | 34.9                                                    |
| 8   | –                                               | 36.8                                                  | 2.96 – 3.01 (2H, <i>m</i> )                       | 36.1                                                    |
| 9   | –                                               | 142.1                                                 | –                                                 | 143.3                                                   |
| 10  | 6.65 (1H, <i>brs</i> )                          | 117.5                                                 | 6.77 (1H, <i>brd</i> , 1.3)                       | 116.6                                                   |
| 11  | –                                               | 154.9                                                 | –                                                 | 153.5                                                   |
| 12  | –                                               | 177.1                                                 | –                                                 | 117.1                                                   |
| 13  | 6.81 (1H, <i>m</i> )                            | 131.6                                                 | 6.91 (1H, <i>d</i> , 7.8)                         | 130.5                                                   |
| 14  | 6.54 (1H, <i>d</i> , 7.5)                       | 122.4                                                 | 6.65 (1H, <i>dd</i> , 7.8, 1.3)                   | 122.6                                                   |
| 1'  | –                                               | 143.4                                                 | –                                                 | 143.6                                                   |
| 2'  | –                                               | 145.5                                                 | –                                                 | 147.8                                                   |
| 3'  | 5.73 (1H, <i>d</i> , 1.0)                       | 116.4                                                 | 5.59 (1H, <i>d</i> , 2.0)                         | 114.7                                                   |
| 4'  | –                                               | 134.6                                                 | –                                                 | 133.6                                                   |
| 5'  | 6.69 (1H, <i>dd</i> , 8.0, 2.0)                 | 121.6                                                 | 6.68 (1H, <i>dd</i> , 8.1, 2.0)                   | 121.6                                                   |
| 6'  | 6.74 (1H, <i>d</i> , 8.0)                       | 116.3                                                 | 6.83 (1H, <i>d</i> , 8.1)                         | 114.6                                                   |
| 7'  | 2.30-2.33 (2H, <i>m</i> )                       | 38.5                                                  | 2.50 (2H, <i>m</i> )                              | 38.0                                                    |
| 8'  | 2.50 (1H, <i>m</i> )<br>2.64 (1H, <i>m</i> )    | 37.6                                                  | 2.29 (2H, <i>m</i> )                              | 36.5                                                    |
| 9'  | –                                               | 138.1                                                 | –                                                 | 142.9                                                   |
| 10' | –                                               | 120.5                                                 | –                                                 | 120.5                                                   |

|     |                                 |       |                                 |       |
|-----|---------------------------------|-------|---------------------------------|-------|
| 11' | –                               | 206.1 | –                               | 154.0 |
| 12' | 6.86 (1H, <i>d</i> , 7.5)       | 113.7 | 6.86 (1H, <i>dd</i> , 8.1, 1.0) | 113.3 |
| 13' | 7.05 (1H, <i>t</i> , 8.0)       | 129.1 | 7.28 (1H, <i>t</i> , 8.1)       | 130.1 |
| 14' | 6.70 (1H, <i>dd</i> , 8.0, 2.0) | 121.6 | 6.69 (1H, <i>dd</i> , 8.1, 1.0) | 121.6 |

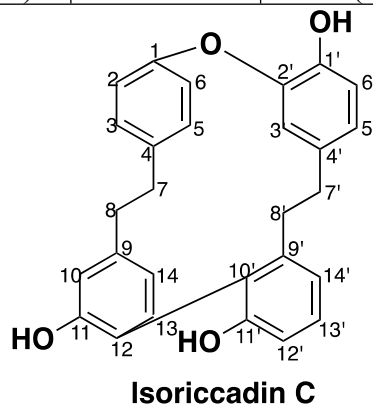

**Table S-4.**  $^1\text{H}$  NMR (500 MHz,  $\delta_{\text{H}}$ , multi, ( $J$  in Hz) and  $^{13}\text{C}$  NMR (125 MHz) data of compound **4** in acetone- $d_6$ .

| No.      | <b>4</b>                                        |                                                    | <b>Marchantin K</b>                                              |                                                             |
|----------|-------------------------------------------------|----------------------------------------------------|------------------------------------------------------------------|-------------------------------------------------------------|
|          | $^1\text{H}$ -NMR<br>(Acetone- $d_6$ , 500 MHz) | $^{13}\text{C}$ -NMR<br>(Acetone- $d_6$ , 125 MHz) | $^1\text{H}$ -NMR<br>( $\text{CDCl}_3$ , 600 MHz)                | $^{13}\text{C}$ -NMR<br>( $\text{CD}_3\text{OD}$ , 150 MHz) |
| <b>1</b> | –                                               | 153.9                                              | –                                                                | 155.2                                                       |
| <b>2</b> | 6.51 (1H, brd, $J = 8.0$ Hz)                    | 123.4                                              | 6.50 (1H, brd, $J = 8.0$ Hz)                                     | 122.7                                                       |
| <b>3</b> | 6.95 (1H, brd, $J = 8.0$ Hz)                    | 129.4                                              | 6.91 (1H, brd, $J = 8.0$ Hz)                                     | 130.6                                                       |
| <b>4</b> | –                                               | 140.0                                              | –                                                                | 140.6                                                       |
| <b>5</b> | 6.95 (1H, brd, $J = 8.0$ Hz)                    | 129.4                                              | 6.91 (1H, brd, $J = 8.0$ Hz)                                     | 130.6                                                       |
| <b>6</b> | 6.51 (1H, brd, $J = 8.0$ Hz)                    | 121.4                                              | 6.50 (1H, brd, $J = 8.0$ Hz)                                     | 122.7                                                       |
| <b>7</b> | 3.09–3.14 (1H, m)<br>2.95–3.06 (1H, m)          | 35.5                                               | 3.00–3.05 (1H, m)<br>2.90–2.97 (1H, m)                           | 37.1                                                        |
| <b>8</b> | 2.95–3.06 (2H, m)                               | 30.1                                               | 2.90–2.97 (1H, m)<br>2.80 (1H, ddd, $J = 15.0,$<br>10.0, 2.0 Hz) | 30.8                                                        |

|                        |                                                    |       |                                                                         |       |
|------------------------|----------------------------------------------------|-------|-------------------------------------------------------------------------|-------|
| <b>9</b>               | –                                                  | 131.4 | –                                                                       | 128.3 |
| <b>10</b>              | 6.82 (1H, dd, $J = 8.0, 1.5$ Hz)                   | 120.9 | 6.83 (1H, d, $J = 8.5$ Hz)                                              | 121.3 |
| <b>11</b>              | 6.76 (1H, d, $J = 8.5$ Hz)                         | 112.3 | 6.75 (1H, d, $J = 8.5$ Hz)                                              | 113.5 |
| <b>12</b>              | –                                                  | 147.1 | –                                                                       | 145.8 |
| <b>13</b>              | –                                                  | 138.8 | –                                                                       | 139.1 |
| <b>14</b>              | –                                                  | 146.3 | –                                                                       | 142.2 |
| <b>1'</b>              | –                                                  | 136.8 | –                                                                       | 134.8 |
| <b>2'</b>              | –                                                  | 149.9 | –                                                                       | 148.9 |
| <b>3'</b>              | 4.97 (1H, d, $J = 2.0$ Hz)                         | 107.6 | 4.96 (1H, d, $J = 2.0$ Hz)                                              | 109.2 |
| <b>4'</b>              | –                                                  | 133.3 | –                                                                       | 132.1 |
| <b>5'</b>              | 6.59 (1H, d, $J = 2.0$ Hz)                         | 106.0 | 6.52 (1H, d, $J = 2.0$ Hz)                                              | 107.0 |
| <b>6'</b>              | –                                                  | 147.3 | –                                                                       | 147.5 |
| <b>7'</b>              | 4.08 (1H, dd, $J = 9.5, 4.0$ Hz)                   | 84.1  | 4.06 (1H, dd, $J = 10.0, 4.0$ Hz)                                       | 85.9  |
| <b>8'</b>              | 3.00 (1H, m)<br>2.59 (1H, dd, $J = 13.0, 10.0$ Hz) | 43.8  | 3.03 (1H, dd, $J = 12.0, 4.0$ Hz)<br>2.56 (1H, dd, $J = 12.0, 10.0$ Hz) | 45.0  |
| <b>9'</b>              | –                                                  | 139.1 | –                                                                       | 139.9 |
| <b>10'</b>             | 6.68 (1H, d, $J = 2.0$ Hz)                         | 116.9 | 6.68 (1H, d, $J = 2.0$ Hz)                                              | 118.1 |
| <b>11'</b>             | –                                                  | 157.6 | –                                                                       | 158.9 |
| <b>12'</b>             | 6.45 (1H, dd, $J = 8.5, 3.0$ Hz)                   | 114.4 | 6.46 (1H, ddd, $J = 8.0, 3.0, 1.0$ )                                    | 114.0 |
| <b>13'</b>             | 6.88 (1H, t, $J = 7.5$ Hz)                         | 127.8 | 6.85 (1H, t, $J = 8.0$ Hz)                                              | 129.0 |
| <b>14'</b>             | 6.05 (1H, brd, $J = 7.0$ Hz)                       | 125.5 | 6.02 (1H, brd, $J = 8.0$ Hz)                                            | 124.6 |
| <b>OCH<sub>3</sub></b> | 3.20 (s)                                           | –     | 3.26 (s)                                                                | –     |

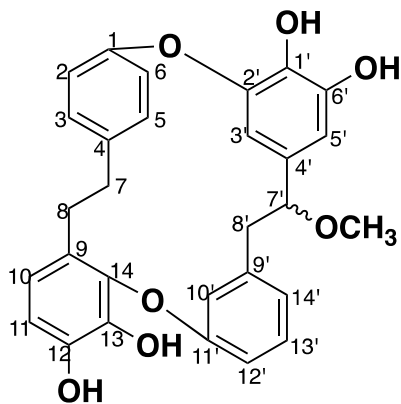

**Marchantin K**

**Table S-5.**  $^1\text{H}$  NMR (500 MHz,  $\delta_{\text{H}}$ , multi, ( $J$  in Hz) and  $^{13}\text{C}$  NMR (125 MHz) data of compound **5** in acetone- $d_6$ .

| No | <b>5</b>                                        |                                                                  | <b>Lunularin (CD<sub>3</sub>OD)</b> |                     |
|----|-------------------------------------------------|------------------------------------------------------------------|-------------------------------------|---------------------|
|    | $^1\text{H}$ -NMR<br>(Acetone- $d_6$ , 500 MHz) | $^{13}\text{C}$ -<br>NMR<br>(Aceton<br>$e$ - $d_6$ , 125<br>MHz) | $\delta_{\text{H}}$ , $J$ (Hz)      | $\delta_{\text{C}}$ |
| 1  | –                                               | 155.5                                                            | –                                   | 156.5               |
| 2  | 6.73 (1H, <i>d</i> , 8.5)                       | 115.0                                                            | 6.67 (1H, <i>d</i> , 8.0)           | 116.1               |
| 3  | 7.03 (1H, <i>d</i> , 8.0)                       | 129.1                                                            | 6.96 (1H, <i>d</i> , 8.0)           | 130.5               |
| 4  | –                                               | 132.6                                                            | –                                   | 134.1               |
| 5  | 7.03 (1H, <i>d</i> , 8.0)                       | 129.1                                                            | 6.96 (1H, <i>d</i> , 8.0)           | 130.5               |
| 6  | 6.73 (1H, <i>d</i> , 8.5)                       | 115.0                                                            | 6.67 (1H, <i>d</i> , 8.0)           | 116.1               |
| 7  | 2.78 (2H, <i>s</i> )                            | 36.8                                                             | 2.76 (2H, <i>s</i> )                | 38.3                |
| 8  | 2.78 (2H, <i>s</i> )                            | 38.1                                                             | 2.76 (2H, <i>s</i> )                | 39.6                |
| 1' | –                                               | 143.6                                                            | –                                   | 144.9               |
| 2' | 6.67 (1H, <i>s</i> )                            | 115.4                                                            | 6.60 (1H, <i>s</i> )                | 116.5               |
| 3' | –                                               | 157.4                                                            | –                                   | 158.3               |
| 4' | 6.69 (1H, <i>d</i> , 2.0)                       | 112.7                                                            | 6.61 (1H, <i>d</i> , 7.8)           | 113.8               |

|    |                           |       |                           |       |
|----|---------------------------|-------|---------------------------|-------|
| 5' | 7.07 (1H, <i>t</i> , 7.8) | 129.3 | 7.03 (1H, <i>t</i> , 7.8) | 131.3 |
| 6' | 6.63 (1H, <i>d</i> , 8.0) | 119.5 | 6.64 (1H, <i>m</i> )      | 121.0 |

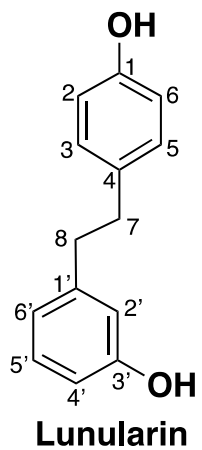

**Table S-6.**  $^1\text{H}$  NMR (500 MHz,  $\delta_{\text{H}}$ , multi, ( $J$  in Hz) and  $^{13}\text{C}$  NMR (125 MHz) data of

| No.                 | <b>6</b>                                          |                                                   | <b>3-(3,4-Dimethoxybenzyl)-5,7-dimethoxyphthalide</b>                  |                                                     |
|---------------------|---------------------------------------------------|---------------------------------------------------|------------------------------------------------------------------------|-----------------------------------------------------|
|                     | $\delta_{\text{H}}$<br>(Acetone- $d_6$ , 500 MHz) | $\delta_{\text{C}}$<br>(Acetone- $d_6$ , 125 MHz) | $\delta_{\text{H}}$ (multi, $J$ in Hz)<br>( $\text{CDCl}_3$ , 400 MHz) | $\delta_{\text{C}}$<br>( $\text{CDCl}_3$ , 100 MHz) |
| 1                   | /                                                 | 167.1                                             | /                                                                      | 168.0                                               |
| 3                   | 5.85 (t, 6.0)                                     | 80.3                                              | 5.59 (t, 6.1)                                                          | 79.9                                                |
| 4                   | 6.61 (s)                                          | 99.5                                              | 6.21 (d, 1.2)                                                          | 98.3                                                |
| 5                   | /                                                 | 166.8                                             | /                                                                      | 166.5                                               |
| 6                   | 6.54 (d, 2.0)                                     | 99.6                                              | 6.38 (d, 1.7)                                                          | 98.9                                                |
| 7                   | /                                                 | 160.3                                             | /                                                                      | 159.7                                               |
| 8                   | /                                                 | 105.1                                             | /                                                                      | 107.3                                               |
| 9                   | /                                                 | 154.8                                             | /                                                                      | 154.2                                               |
| 10                  | 3.25 (dd, 14.0, 5.0)<br>3.10 (dd, 14.0, 6.0)      | 40.6                                              | 3.16 (dd, 14.2, 6.3)<br>3.07 (dd, 14.2, 5.9)                           | 40.5                                                |
| 1'                  | /                                                 | 129.3                                             | /                                                                      | 127.8                                               |
| 2'                  | 6.87 (d, 1.5)                                     | 114.6                                             | 6.73 (br, s)                                                           | 113.3                                               |
| 3'                  | /                                                 | 150.0                                             | /                                                                      | 149.0                                               |
| 4'                  | /                                                 | 148.3                                             | /                                                                      | 148.3                                               |
| 5'                  | 6.82 (d, 8.0)                                     | 112.6                                             | 6.78 (d, 8.0)                                                          | 111.5                                               |
| 6'                  | 6.77 (dd, 8.5, 2.0)                               | 122.9                                             | 6.74 (dd, 7.3, 1.8)                                                    | 122.1                                               |
| 5-OCH <sub>3</sub>  | 3.87 (s)                                          | 56.4                                              | 3.79 (s)                                                               | 56.0                                                |
| 7-OCH <sub>3</sub>  | 3.89 (s)                                          | 56.0                                              | 3.91 (s)                                                               | 56.0                                                |
| 3'-OCH <sub>3</sub> | 3.75 (s)                                          | 56.3                                              | 3.83 (s)                                                               | 55.9                                                |
| 4'-OCH <sub>3</sub> | 3.73 (s)                                          | 56.4                                              | 3.84 (s)                                                               | 55.9                                                |

compound **6** in acetone- $d_6$ .



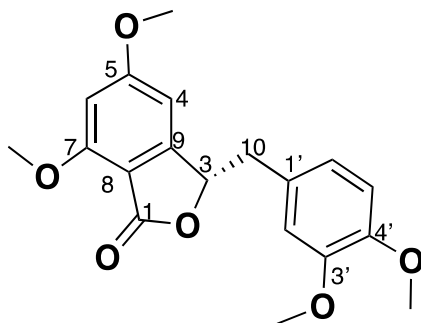

**3-(3,4-Dimethoxybenzyl)-5,7-dimethoxyphthalide**

**Table S-7.**  $^1\text{H}$  NMR (500 MHz,  $\delta_{\text{H}}$ , multi, ( $J$  in Hz) and  $^{13}\text{C}$  NMR (125 MHz) data of compound **8** in acetone- $d_6$ .

| No. | <b>8</b>                                                         |                                                |                                                                     | (5 <i>S</i> ,8 <i>R</i> ,9 <i>S</i> ,10 <i>R</i> )-2-Oxo-ent-3-cleroden-15-oic acid (A) |                                                 | Methyl (5 <i>S</i> ,8 <i>R</i> ,9 <i>S</i> ,10 <i>R</i> )-2-oxo-ent-clerod-3,13-dien-15-oate (B) |                                                 |
|-----|------------------------------------------------------------------|------------------------------------------------|---------------------------------------------------------------------|-----------------------------------------------------------------------------------------|-------------------------------------------------|--------------------------------------------------------------------------------------------------|-------------------------------------------------|
|     | $\delta_{\text{H}}$ (multi, $J$ in Hz) (Acetone- $d_6$ , 500MHz) | $\delta_{\text{C}}$ (Acetone- $d_6$ , 500 MHz) | $\delta_{\text{H}}$ (multi, $J$ in Hz) ( $\text{CDCl}_3$ , 200 MHz) | $\delta_{\text{H}}$ (multi, $J$ in Hz) ( $\text{CDCl}_3$ , 200 MHz)                     | $\delta_{\text{C}}$ ( $\text{CDCl}_3$ , 50 MHz) | $\delta_{\text{H}}$ (multi, $J$ in Hz) ( $\text{CDCl}_3$ , 200 MHz)                              | $\delta_{\text{C}}$ ( $\text{CDCl}_3$ , 50 MHz) |
| 1   | 2.66 (dd, 18.5, 7.0)<br>2.43 (d, 18.0)                           | 35.7                                           | 2.69 (dd, 18.5, 6.5)<br>2.50 (d, 18.5)                              |                                                                                         | 35.1                                            |                                                                                                  | 35.4                                            |
| 2   |                                                                  | 198.8                                          |                                                                     |                                                                                         | 199.1                                           |                                                                                                  | 200.3                                           |
| 3   | 5.56 (d, 1.0)                                                    | 129.1                                          | 5.84 (brs)                                                          | 5.70 (m)                                                                                | 128.5                                           | 5.65 (br s)                                                                                      | 128.5                                           |
| 4   |                                                                  | 169.4                                          |                                                                     |                                                                                         | 168.6                                           |                                                                                                  | 167.5                                           |
| 5   |                                                                  | 40.1                                           |                                                                     |                                                                                         | 38.6                                            |                                                                                                  | 38.6                                            |
| 6   |                                                                  | 37.5                                           |                                                                     |                                                                                         | 36.7                                            |                                                                                                  | 36.7                                            |
| 7   |                                                                  | 29.1                                           |                                                                     |                                                                                         | 28.9                                            |                                                                                                  | 28.9                                            |

|    |                                                        |       |                                            |                                   |       |                                        |       |
|----|--------------------------------------------------------|-------|--------------------------------------------|-----------------------------------|-------|----------------------------------------|-------|
| 8  |                                                        | 37.4  |                                            |                                   | 36.6  |                                        | 36.6  |
| 9  |                                                        | 40.3  |                                            |                                   | 39.3  |                                        | 39.3  |
| 10 | 1.90 (m)                                               | 47.9  | 1.83 (d,<br>6.5)                           |                                   | 45.7  |                                        | 45.7  |
| 11 |                                                        | 31.3  |                                            |                                   | 35.4  |                                        | 34.0  |
| 12 |                                                        | 35.8  |                                            |                                   | 36.2  |                                        | 36.8  |
| 13 |                                                        | 72.8  |                                            |                                   | 30.7  |                                        | 160.3 |
| 14 | 5.93 (dd,<br>17.0,<br>10.5)                            | 147.1 | 5.87 (dd,<br>10.5,<br>17.5)                | 5.70 (m)                          | 41.4  |                                        | 115.2 |
| 15 | 5.21 (dd,<br>17.5, 2.0)<br><br>4.98 (dd,<br>11.0, 2.0) | 111.5 | 5.09 (d,<br>11.0)<br><br>5.20 (d,<br>16.5) | 7.65 (1H,<br>br s)                | 178.7 |                                        | 167.0 |
| 16 | 1.24 (s)                                               | 28.5  | 1.22 (s)                                   | 2.17 (s)<br><br>1.10 - 0.8<br>(m) | 19.9  | 2.09 (br<br>s)<br><br>0.96 (d,<br>6.0) | 19.1  |
| 17 | 0.78 (d,<br>7.0)                                       | 16.3  | 0.77 (d,<br>7.0)                           | 1.10 - 0.8<br>(m)                 | 16.0  | 0.80 -<br>0.50 (m)                     | 15.9  |
| 18 | 1.96 (d,<br>1.0)                                       | 20.5  | 1.94 (d,<br>1.5)                           | 1.90 (br s)                       | 20.5  | 1.80 (br<br>s)                         | 20.5  |
| 19 | 1.25 (s)                                               | 32.3  | 1.25 (s)                                   | 1.10 - 0.8<br>(m)                 | 32.1  | 1.06 (br<br>s)                         | 32.1  |
| 20 | 0.56 (s)                                               | 19.6  | 0.58 (s)                                   |                                   | 18.0  | 0.80 -<br>0.50 (m)                     | 17.8  |

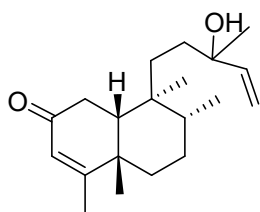

**Marchanol (8)**

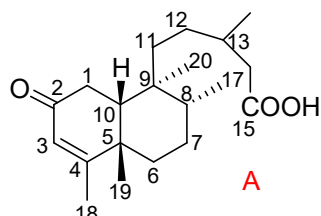

(5*S*,8*R*,9*S*,10*R*)-2-Oxo-ent-3-cleroden-15-oic acid

44-Molecules2009  
2a-lopes1987

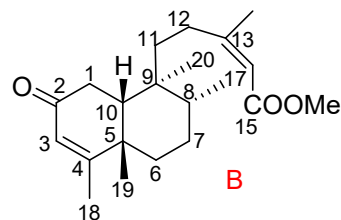

Methyl (5*S*,8*R*,9*S*,10*R*)-2-oxo-ent-clerod-3,13-dien-15-oate

49-molecules2009  
2b-lopes1987

1. A.G. Pacheco, P. Machado De Oliveira, D. Piló-Veloso, A. Flávio De Carvalho Alcântara. <sup>13</sup>C-NMR Data of Diterpenes Isolated from Aristolochia Species. *Molecules* **2009**, 14 (3), 1245–1262.
2. M. X. Lopes, L. M. V. Trevisan, and V. da S. Bolzani, *Clerodane diterpenes from Aristolochia species*. *Phytochemistry*, 1987, **26**, 2781-2784, DOI: [10.1016/S0031-9422\(00\)83590-6](https://doi.org/10.1016/S0031-9422(00)83590-6)

**Table S-8.** <sup>1</sup>H NMR (500 MHz, δ<sub>H</sub>, multi, (*J* in Hz) and <sup>13</sup>C NMR (125 MHz) data of compound **9** in acetone-*d*<sub>6</sub>.

| No. | <b>9</b>                                                                             |                                                              | <b>Vitexilactone</b>                                                    |                                              |
|-----|--------------------------------------------------------------------------------------|--------------------------------------------------------------|-------------------------------------------------------------------------|----------------------------------------------|
|     | δ <sub>H</sub> (multi, <i>J</i> in Hz)<br>(Acetone- <i>d</i> <sub>6</sub> , 500 MHz) | δ <sub>C</sub><br>(Acetone- <i>d</i> <sub>6</sub> , 125 MHz) | δ <sub>H</sub> (multi, <i>J</i> in Hz)<br>(CDCl <sub>3</sub> , 500 MHz) | δ <sub>C</sub> (CDCl <sub>3</sub> , 125 MHz) |
| 1   | 1.43 (m)<br>1.32 (m)                                                                 | 32.5                                                         | 1.45 (m)<br>1.36 (ca)                                                   | 33.6                                         |
| 2   | 1.71 (m)<br>1.50 (m)                                                                 | 19.6                                                         | 1.65 (m)<br>1.50 (ca)                                                   | 18.6                                         |
| 3   | 1.37 (m)<br>1.24 (m)                                                                 | 43.0                                                         | 1.36 (ca)<br>1.17 (ddd, 3.0, 13.5, 13.5)                                | 43.6                                         |
| 4   | –                                                                                    | 34.7                                                         | –                                                                       | 34.0                                         |
| 5   | 1.76 (d, 2.3)                                                                        | 45.6                                                         | 1.56 (d, 3.0)                                                           | 47.7                                         |
| 6   | 5.34 (q, 3.0, 3.0, 2.5)                                                              | 70.4                                                         | 5.39 (ddd 3.0, 3.0, 3.0)                                                | 69.8                                         |

|    |                                                    |       |                                                            |       |
|----|----------------------------------------------------|-------|------------------------------------------------------------|-------|
| 7  | 1.47 (m)<br>1.44 (m)                               | 37.4  | 1.59 (ca)<br>1.50 (ca)                                     | 36.1  |
| 8  | 2.17 (m)                                           | 32.8  | 2.14 (m)                                                   | 32.1  |
| 9  | 2.02                                               | 77.0  | –                                                          | 76.5  |
| 10 | –                                                  | 44.7  | –                                                          | 43.8  |
| 11 | 1.85 (q, 6.5, 3.0, 4.5)<br>1.82 (q, 4.0, 4.0, 6.5) | 32.6  | 1.98 (ddd, 6.0, 10.5, 15.0)<br>1.75 (ddd, 6.0, 10.5, 15.0) | 31.6  |
| 12 | 2.61 (m) 2H                                        | 26.0  | 2.50 (ca) 2H                                               | 25.4  |
| 13 | –                                                  | 173.4 | –                                                          | 171.1 |
| 14 | 5.86 (p, 1.5, 2.0, 1.5,<br>2.0)                    | 114.8 | 5.84 (dddd, 1.5, 1.5, 1.5<br>1.5)                          | 115.0 |
| 15 | –                                                  | 174.0 | –                                                          | 174.0 |
| 16 | 4.85 (d) 2H                                        | 73.8  | 4.76 (br s) 2H                                             | 73.2  |
| 17 | 0.92 (s)                                           | 16.4  | 0.90 (d, 6.5)                                              | 16.1  |
| 18 | 0.93 (s)                                           | 34.0  | 0.97 (s)                                                   | 33.6  |
| 19 | 1.02 (s)                                           | 24.1  | 1.01 (s)                                                   | 23.7  |
| 20 | 1.30 (s)                                           | 19.5  | 1.26 (s)                                                   | 19.0  |
| 1' | –                                                  | 170.5 | –                                                          | 170.4 |
| 2' | 2.00 (s)                                           | 21.8  | 2.06 (s)                                                   | 21.9  |

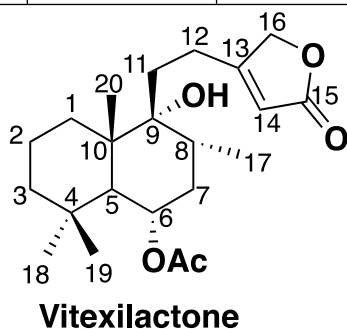

**Table S-9.**  $^1\text{H}$  NMR (500 MHz,  $\delta_{\text{H}}$ , multi, ( $J$  in Hz) in acetone- $d_6$ ,  $\text{CDCl}_3$  and  $^{13}\text{C}$  NMR (125 MHz) data of compound **10** in acetone- $d_6$ .

| No. | 10                                       |                                          |                                             | 12-oleanene-3-one                           |                                             |
|-----|------------------------------------------|------------------------------------------|---------------------------------------------|---------------------------------------------|---------------------------------------------|
|     | $\delta_C$<br>(Acetone- $d_6$ , 125 MHz) | $\delta_H$<br>(Acetone- $d_6$ , 500 MHz) | $\delta_H$<br>(CDCl <sub>3</sub> , 500 MHz) | $\delta_C$<br>(CDCl <sub>3</sub> , 125 MHz) | $\delta_H$<br>(CDCl <sub>3</sub> , 500 MHz) |
| 1   | 39.8                                     | –                                        | –                                           | 39.8                                        | –                                           |
| 2   | 34.7                                     | –                                        | –                                           | 34.5                                        | –                                           |
| 3   | 216.2                                    | –                                        | –                                           | 217.2                                       | –                                           |
| 4   | 47.7                                     | –                                        | –                                           | 47.6                                        | –                                           |
| 5   | 56.0                                     | –                                        | –                                           | 55.3                                        | –                                           |
| 6   | 20.4                                     | –                                        | –                                           | 18.8                                        | –                                           |
| 7   | 33.1                                     | –                                        | –                                           | 33.2                                        | –                                           |
| 8   | 40.0                                     | –                                        | –                                           | 40.1                                        | –                                           |
| 9   | 47.8                                     | 2.31 (1H, m)                             | 2.37 (1H, m)                                | 47.7                                        | 2.33 (1H, m)                                |
| 10  | 35.5                                     | –                                        | –                                           | 36.6                                        | –                                           |
| 11  | 23.7                                     | –                                        | –                                           | 23.7                                        | –                                           |
| 12  | 122.8                                    | 5.24 (1H, t, 4.0)                        | 5.21 (1H, t, 3.5, 4.0)                      | 122.4                                       | 5.27 (1H, dd, 3.7, 3.4)                     |
| 13  | 146.0                                    | –                                        | –                                           | 144.1                                       | –                                           |
| 14  | 41.9                                     | –                                        | –                                           | 42.5                                        | –                                           |
| 15  | 26.4                                     | –                                        | –                                           | 26.2                                        | –                                           |
| 16  | 26.9                                     | –                                        | –                                           | 26.9                                        | –                                           |
| 17  | 32.3                                     | –                                        | –                                           | 32.5                                        | –                                           |
| 18  | 47.0                                     | –                                        | –                                           | 47.2                                        | –                                           |
| 19  | 47.3                                     | –                                        | –                                           | 47.1                                        | –                                           |
| 20  | 31.3                                     | –                                        | –                                           | 31.0                                        | –                                           |
| 21  | 34.7                                     | –                                        | –                                           | 34.6                                        | –                                           |

|    |      |              |              |      |              |
|----|------|--------------|--------------|------|--------------|
| 22 | 37.1 | –            | –            | 36.9 | –            |
| 23 | 26.4 | 1.03 (3H, s) | 1.06 (3H, s) | 26.4 | 1.04 (3H, s) |
| 24 | 21.9 | 1.05 (3H, s) | 1.07 (3H, s) | 22.1 | 1.07 (3H, s) |
| 25 | 15.6 | 1.10 (3H, s) | 1.02 (3H, s) | 15.6 | 1.01 (3H, s) |
| 26 | 17.3 | 1.06 (3H, s) | 1.00 (3H, s) | 16.8 | 0.99 (3H, s) |
| 27 | 24.6 | 1.19 (3H, s) | 1.25 (3H, s) | 25.9 | 1.24 (3H, s) |
| 28 | 28.9 | 0.87 (3H, s) | 0.84 (3H, s) | 28.6 | 0.84 (3H, s) |
| 29 | 23.7 | 0.89 (3H, s) | 0.92 (3H, s) | 23.7 | 0.90 (3H, s) |
| 30 | 32.3 | 0.88 (3H, s) | 0.87 (3H, s) | 32.8 | 0.86 (3H, s) |

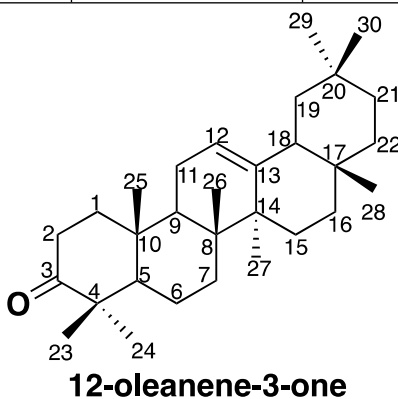

**Table S-10.**  $^1\text{H}$  NMR (400 MHz,  $\delta_{\text{H}}$ , multi, ( $J$  in Hz) and  $^{13}\text{C}$  NMR (125 MHz) data of compound **11** in  $\text{CDCl}_3$

| No. | <b>11</b>                                                              |                                                     | <b>3,11-dioxo ursolic acid</b>                                         |                                                       |
|-----|------------------------------------------------------------------------|-----------------------------------------------------|------------------------------------------------------------------------|-------------------------------------------------------|
|     | $\delta_{\text{H}}$ (multi, $J$ in Hz)<br>( $\text{CDCl}_3$ , 400 MHz) | $\delta_{\text{C}}$<br>( $\text{CDCl}_3$ , 100 MHz) | $\delta_{\text{H}}$ (multi, $J$ in Hz)<br>( $\text{CDCl}_3$ , 300 MHz) | $\delta_{\text{C}}$<br>( $\text{CDCl}_3$ , 100.6 MHz) |
| 1   | 38.7                                                                   | –                                                   | 39.9                                                                   | –                                                     |
| 2   | 34.3                                                                   | –                                                   | 33.5                                                                   | –                                                     |
| 3   | 217.4                                                                  | –                                                   | 215.9                                                                  | –                                                     |
| 4   | 47.9                                                                   | –                                                   | 46.7                                                                   | –                                                     |

|    |       |                         |       |                         |
|----|-------|-------------------------|-------|-------------------------|
| 5  | 55.5  | –                       | 54.0  | –                       |
| 6  | 19.0  | –                       | 18.3  | –                       |
| 7  | 32.5  | –                       | 32.0  | –                       |
| 8  | 39.9  | –                       | 40.7  | –                       |
| 9  | 60.8  | 2.39 (1H, s)            | 59.7  | 2.48 (1H, s)            |
| 10 | 36.9  | –                       | 37.5  | –                       |
| 11 | 199.5 | –                       | 198.7 | –                       |
| 12 | 130.8 | 5.63 (1H, s)            | 131.8 | 5.61 (1H, s)            |
| 13 | 163.3 | –                       | 164.8 | –                       |
| 14 | 44.0  | –                       | 43.6  | –                       |
| 15 | 28.6  | –                       | 28.4  | –                       |
| 16 | 23.8  | –                       | 24.2  | –                       |
| 17 | 47.6  | –                       | 47.0  | –                       |
| 18 | 52.6  | –                       | 53.8  | 2.46 (1H, d, J=12)      |
| 19 | 41.5  | –                       | 71.9  | –                       |
| 20 | 41.5  | –                       | 41.1  | –                       |
| 21 | 26.6  | –                       | 25.6  | –                       |
| 22 | 36.1  | –                       | 36.4  | –                       |
| 23 | 26.6  | 0.90 (3H, s)            | 26.1  | 0.88 (3H, s)            |
| 24 | 21.2  | 0.95 (3H, s)            | 20.8  | 0.94 (3H, s)            |
| 25 | 15.7  | 1.02 (3H, s)            | 15.3  | 0.98 (3H, s)            |
| 26 | 18.8  | 1.24 (3H, s)            | 18.2  | 1.22 (3H, s)            |
| 27 | 21.1  | 1.31 (3H, s)            | 20.7  | 1.30 (3H, s)            |
| 28 | 182.8 |                         | 180.0 |                         |
| 29 | 23.7  | 0.87 (3H, d, J= 6.5 Hz) | 26.0  | 0.85 (3H, d, J= 7.5 Hz) |
| 30 | 17.2  | 0.97(3H, d, J= 6.3 Hz)  | 16.0  | 0.90 (3H, d, J= 8.0 Hz) |

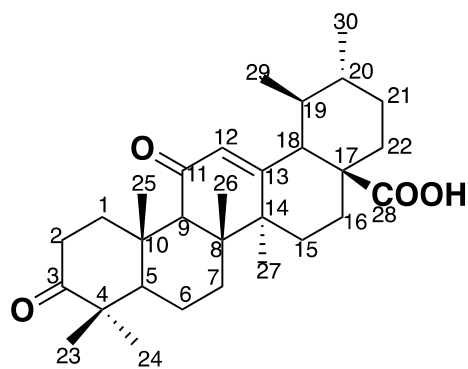

**3,11-dioxo ursolic acid**

**Table S-11.**  $^1\text{H}$  NMR (500 MHz,  $\delta_{\text{H}}$ , multi, ( $J$  in Hz) and  $^{13}\text{C}$  NMR (125 MHz) data of compound **12** in  $\text{CDCl}_3$

| No. | <b>12</b>                                           |                                                     | <b>Ursolic acid</b> |                              |
|-----|-----------------------------------------------------|-----------------------------------------------------|---------------------|------------------------------|
|     | $\delta_{\text{C}}$<br>( $\text{CDCl}_3$ , 125 MHz) | $\delta_{\text{H}}$<br>( $\text{CDCl}_3$ , 500 MHz) | $\delta_{\text{C}}$ | $\delta_{\text{H}}$          |
| 1   | 38.9                                                | –                                                   | 38.9                | –                            |
| 2   | 27.4                                                | –                                                   | 27.1                | –                            |
| 3   | 79.2                                                | 3.22 (1H, dd, $J=5.0, 7.0, 4.0$ )                   | 79.0                | 3.11 (1H, dd, $J=9.0, 7.0$ ) |
| 4   | 39.0                                                | –                                                   | 39.0                | –                            |
| 5   | 55.4                                                | –                                                   | 55.6                | –                            |
| 6   | 18.5                                                | –                                                   | 18.6                | –                            |
| 7   | 33.2                                                | –                                                   | 33.4                | –                            |
| 8   | 39.6                                                | –                                                   | 39.8                | –                            |
| 9   | 47.7                                                | –                                                   | 47.9                | –                            |
| 10  | 36.8                                                | –                                                   | 37.2                | –                            |
| 11  | 23.7                                                | –                                                   | 23.6                | –                            |
| 12  | 126.0                                               | 5.26 (1H, t, $J=4.0$ )                              | 125.8               | 5.16 (1H, t, $J=3.5$ )       |



|    |       |                      |       |                      |
|----|-------|----------------------|-------|----------------------|
| 13 | 138.1 | –                    | 138.5 | –                    |
| 14 | 42.2  | –                    | 42.4  | –                    |
| 15 | 30.8  | –                    | 29.9  | –                    |
| 16 | 24.4  | –                    | 24.5  | –                    |
| 17 | 48.0  | –                    | 48.1  | –                    |
| 18 | 53.0  | 2.19 (1H, d, J=11.5) | 53.2  | 2.11 (1H, d, J=11.8) |
| 19 | 41.7  | –                    | 39.4  | –                    |
| 20 | 39.6  | –                    | 39.2  | –                    |
| 21 | 26.6  | –                    | 30.9  | –                    |
| 22 | 36.1  | –                    | 37.1  | –                    |
| 23 | 28.3  | 0.92 (3H, s)         | 28.3  | 0.90 (3H, s)         |
| 24 | 15.6  | 0.77 (3H, s)         | 15.6  | 0.74 (3H, s)         |
| 25 | 15.8  | 0.78 (3H, s)         | 15.8  | 0.70 (3H, s)         |
| 26 | 17.2  | 0.85 (3H, s)         | 17.2  | 0.84 (3H, s)         |
| 27 | 21.1  | 0.99 (3H, s)         | 23.7  | 1.01 (3H, s)         |
| 28 | 182.8 | –                    | 180.8 | –                    |
| 29 | 17.1  | 0.86 (3H, d, J= 6.5) | 17.1  | 0.86 (3H, d, J= 6.1) |
| 30 | 21.3  | 0.77 (3H, d, J= 4)   | 21.3  | 0.78 (3H, d, J= 6.5) |

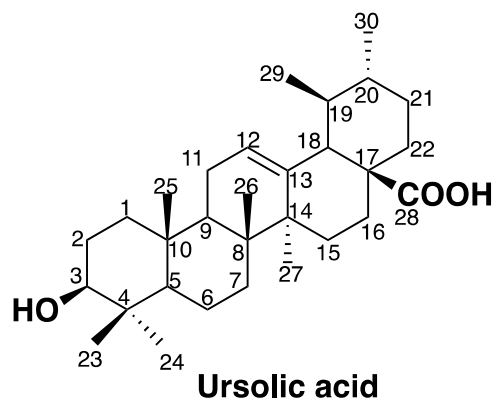

**Table S-12.**  $^1\text{H}$  NMR (500 MHz,  $\delta_{\text{H}}$ , multi, ( $J$  in Hz) in acetone- $d_6$ ,  $\text{CDCl}_3$  and  $^{13}\text{C}$  NMR (125 MHz) data of compound **13** in acetone- $d_6$ .

| No.                      | <b>13</b>                                          |                                                       | <b>Artemetin</b>                             |                                                    |
|--------------------------|----------------------------------------------------|-------------------------------------------------------|----------------------------------------------|----------------------------------------------------|
|                          | $^1\text{H}$ -NMR<br>(Acetone- $d_6$ ,<br>500 MHz) | $^{13}\text{C}$ -NMR<br>(Acetone- $d_6$ ,<br>125 MHz) | $^1\text{H}$ -NMR<br>(DMSO- $d_6$ , 500 MHz) | $^{13}\text{C}$ -NMR<br>(DMSO- $d_6$ , 125<br>MHz) |
| <b>1</b>                 | –                                                  | –                                                     | –                                            | –                                                  |
| <b>2</b>                 | –                                                  | 155.8                                                 | –                                            | 155.6                                              |
| <b>3</b>                 | –                                                  | 138.6                                                 | –                                            | 138.1                                              |
| <b>4</b>                 | –                                                  | 178.9                                                 | –                                            | 178.4                                              |
| <b>4a</b>                | –                                                  | 106.2                                                 | –                                            | 105.7                                              |
| <b>5</b>                 | –                                                  | 152.7                                                 | –                                            | 151.9                                              |
| <b>6</b>                 | –                                                  | 132.3                                                 | –                                            | 131.7                                              |
| <b>7</b>                 | –                                                  | 159.3                                                 | –                                            | 158.8                                              |
| <b>8</b>                 | 6.81 (1H, s)                                       | 90.8                                                  | 6.89 (1H, s)                                 | 91.6                                               |
| <b>8a</b>                | –                                                  | 152.3                                                 | –                                            | 151.7                                              |
| <b>1'</b>                | –                                                  | 122.8                                                 | –                                            | 122.2                                              |
| <b>2'</b>                | 7.78 (1H, d, $J$<br>= 2.0 Hz)                      | 122.1                                                 | 7.61 (1H, d, $J$ = 2.0 Hz)                   | 124.0                                              |
| <b>3'</b>                | –                                                  | 149.2                                                 | –                                            | 148.7                                              |
| <b>4'</b>                | –                                                  | 152.0                                                 | –                                            | 151.4                                              |
| <b>5'</b>                | 7.14 (1H, d, $J$<br>= 8.5 Hz)                      | 111.3                                                 | 7.11 (1H, d, $J$ = 8.5 Hz)                   | 111.3                                              |
| <b>6'</b>                | 7.76 (1H, dd,<br>$J$ = 2.0, 3.0<br>Hz)             | 111.8                                                 | 7.69 (1H, dd, $J$ = 2.0, 8.5<br>Hz)          | 111.7                                              |
| <b>3-OCH<sub>3</sub></b> | 3.92 (3H, s)                                       | 59.4                                                  | 3.77 (3H, s)                                 | 56.6                                               |
| <b>5-OH</b>              | 12.69 (1H, s)                                      | –                                                     | 12.53 (1H, s)                                | –                                                  |

|                     |              |      |              |      |
|---------------------|--------------|------|--------------|------|
| 6-OCH <sub>3</sub>  | 3.96 (3H, s) | 55.9 | 3.88 (3H, s) | 55.8 |
| 7-OCH <sub>3</sub>  | 3.90 (6H, s) | 59.7 | 3.82 (3H, s) | 60.1 |
| 3'-OCH <sub>3</sub> |              | 55.4 | 3.81 (3H, s) | 55.8 |
| 4'-OCH <sub>3</sub> | 3.80 (3H, s) | 55.3 | 3.68 (3H, s) | 55.7 |

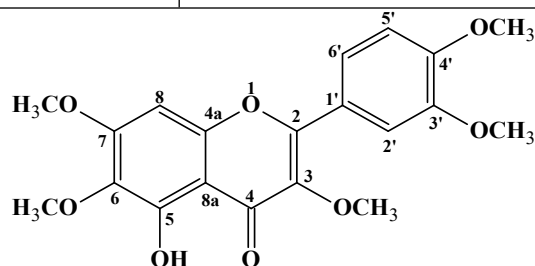

**Armetin**

**Table S-13.** <sup>1</sup>H NMR (500 MHz, δ<sub>H</sub>, multi, (*J* in Hz) in acetone-*d*<sub>6</sub>, CDCl<sub>3</sub> and <sup>13</sup>C NMR (125 MHz) data of compound **1a** and **1** in acetone-*d*<sub>6</sub>.

| No | <b>1a</b>                                                        |                                                      | <b>1</b>                                                         |                                                      |
|----|------------------------------------------------------------------|------------------------------------------------------|------------------------------------------------------------------|------------------------------------------------------|
|    | <sup>1</sup> H-NMR<br>(acetone- <i>d</i> <sub>6</sub> , 500 MHz) | <sup>13</sup> C-NMR<br>(CDCl <sub>3</sub> , 125 MHz) | <sup>1</sup> H-NMR<br>(acetone- <i>d</i> <sub>6</sub> , 500 MHz) | <sup>13</sup> C-NMR<br>(CDCl <sub>3</sub> , 125 MHz) |
| 1  | –                                                                | 154.1                                                | –                                                                | 153.2                                                |
| 2  | 6.50 (1H, <i>d</i> , 7.5)                                        | 121.8                                                | 6.57 (1H, <i>d</i> , 8.0)                                        | 121.2                                                |
| 3  | 6.96 (1H, <i>d</i> , 8.0)                                        | 129.1                                                | 6.91 (1H, <i>d</i> , 8.5)                                        | 129.6                                                |
| 4  | –                                                                | 137.1                                                | –                                                                | 139.1                                                |
| 5  | 6.96 (1H, <i>d</i> , 8.0)                                        | 129.1                                                | 6.91 (1H, <i>d</i> , 8.5)                                        | 129.6                                                |
| 6  | 6.50 (1H, <i>d</i> , 7.5)                                        | 121.8                                                | 6.57 (1H, <i>d</i> , 8.0)                                        | 121.2                                                |
| 7  | 3.02 – 3.06 (4H, <i>m</i> )                                      | 35.7                                                 | 2.97–3.01 (2H, <i>m</i> )                                        | 35.3                                                 |
| 8  | 3.02 – 3.06 (4H, <i>m</i> )                                      | 34.1                                                 | 2.97–3.01 (2H, <i>m</i> )                                        | 30.3                                                 |
| 9  | –                                                                | 130.7                                                | –                                                                | 136.2                                                |
| 10 | 6.82 (1H, <i>dd</i> , 8.0, 1.5)                                  | 121.5                                                | 7.00 (1H, <i>dd</i> , 8.0, 1.5)                                  | 121.9                                                |

|     |                                 |       |                                 |       |
|-----|---------------------------------|-------|---------------------------------|-------|
| 11  | 7.00 (1H, <i>t</i> , 8.0)       | 122.1 | 7.13 (1H, <i>dd</i> , 8.0, 7.5) | 126.0 |
| 12  | 6.61 (1H, <i>dd</i> , 8.5, 2.5) | 113.8 | 6.85 (1H, <i>dd</i> , 8.0, 1.5) | 114.4 |
| 13  | –                               | 118.5 | –                               | 148.7 |
| 14  | –                               | 142.4 | –                               | 139.7 |
| 1'  | –                               | 139.5 | –                               | 130.8 |
| 2'  | –                               | 147.0 | –                               | 146.5 |
| 3'  | 5.34 (1H, <i>s</i> )            | 109.6 | 5.13 (1H, <i>d</i> , 1.5)       | 107.9 |
| 4'  | –                               | 133.8 | –                               | 132.5 |
| 5'  | –                               | 105.0 | 6.46 (1H, <i>d</i> , 1.5)       | 109.3 |
| 6'  | –                               | 144.5 | –                               | 144.3 |
| 7'  | 2.91 – 2.93 (2H, <i>m</i> )     | 34.8  | 2.78–2.80 (2H, <i>m</i> )       | 34.1  |
| 8'  | 2.91 – 2.93 (2H, <i>m</i> )     | 35.7  | 2.72–2.74 (2H, <i>m</i> )       | 35.5  |
| 9'  | –                               | 142.4 | –                               | 143.1 |
| 10' | 6.28 (1H, <i>d</i> , 7.5)       | 115.2 | 6.57 (1H, <i>dd</i> , 2.5, 2.0) | 115.5 |
| 11' | –                               | 158.7 | –                               | 156.8 |
| 12' | 7.04 (1H, <i>dd</i> , 8.0, 1.5) | 116.5 | 6.53 (1H, <i>dd</i> , 8.5, 2.0) | 112.0 |
| 13' | 7.10 (1H, <i>t</i> , 7.8)       | 130.5 | 6.97 (1H, <i>t</i> , 7.8)       | 128.9 |
| 14' | 6.28 (1H, <i>d</i> , 7.5)       | 126.4 | 6.39 (1H, <i>brd</i> , 7.5)     | 123.2 |

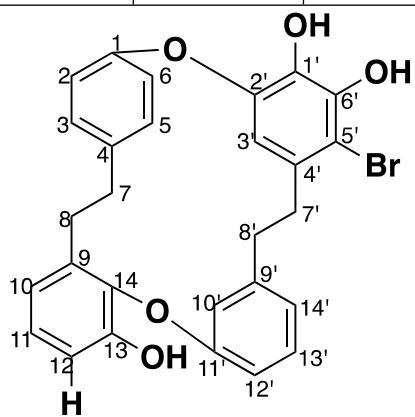

**1a**

Figure S-1. Compounds reported in *Marchantia polymorpha* L.

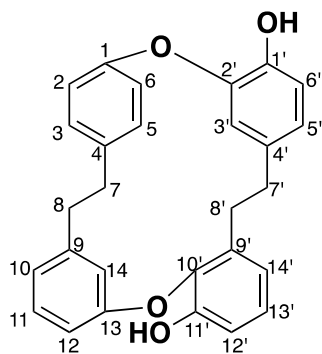

Isomarchantin C (1)

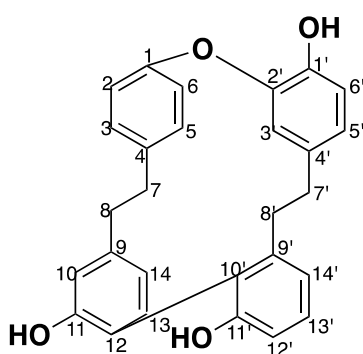

Isoriccadin C (2)

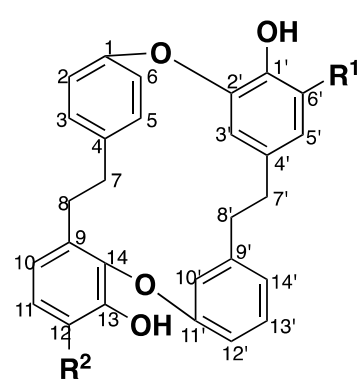

R<sup>1</sup>=OH R<sup>2</sup>=H Marchantin A (3)  
R<sup>1</sup>=H R<sup>2</sup>=H Marchantin C (4)

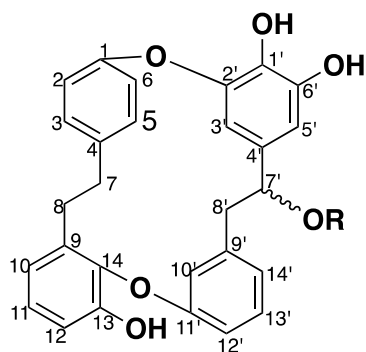

R=H Marchantin D (5)  
R=CH<sub>3</sub> Marchantin E (6)

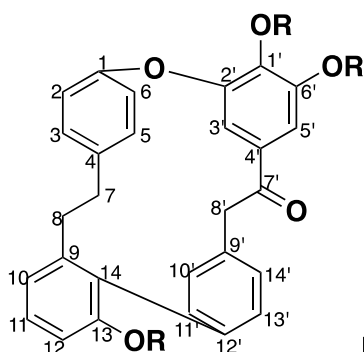

R=H Marchantin G (7)  
R=CH<sub>3</sub> Riccadin C (8)

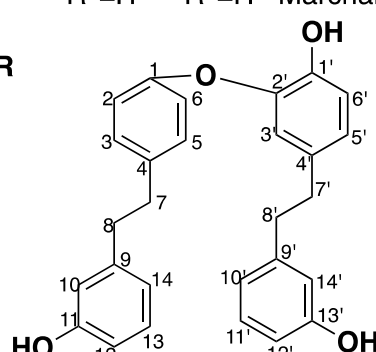

Perrottetin (9)

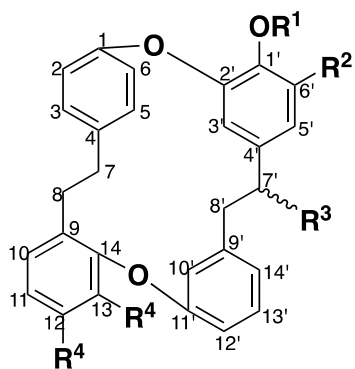

R<sup>1</sup>=H R<sup>2</sup>=H R<sup>3</sup>=H R<sup>4</sup>=OH Marchantin B (15)  
R<sup>1</sup>=H R<sup>2</sup>=OH R<sup>3</sup>=OCH<sub>3</sub> R<sup>4</sup>=OH Marchantin K (17)

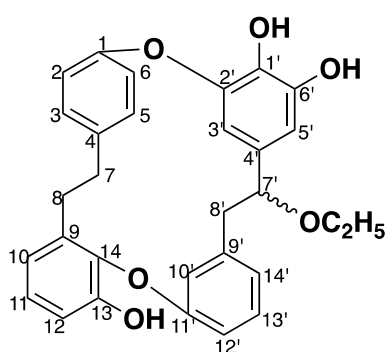

Marchantin J (16)

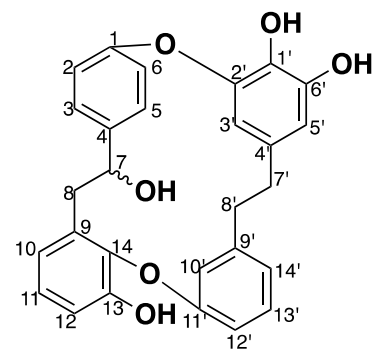

Marchantin L (18)

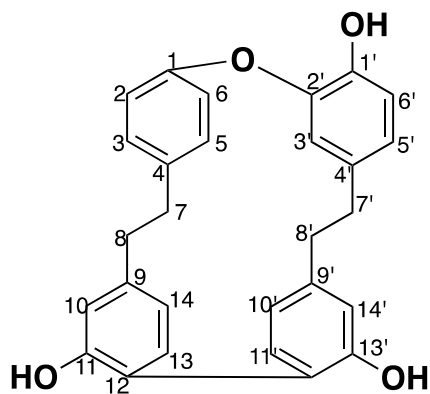

Polymorphatin A (29)

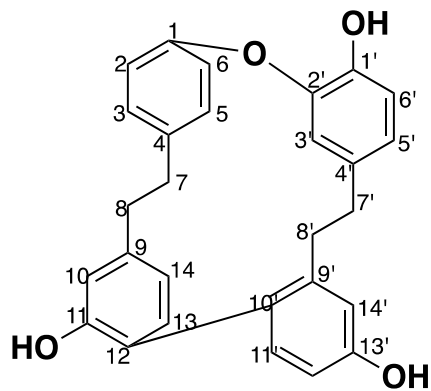

Isorricardin D (30)

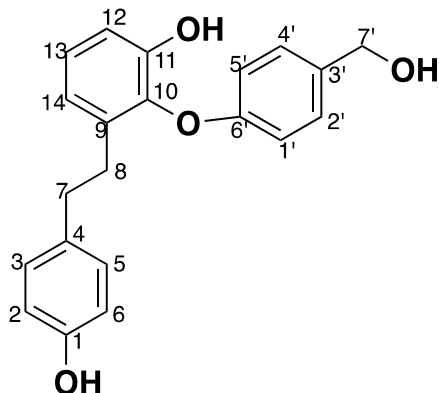

2-[3-(hydroxymethyl)phenoxy]-3-[(4-hydroxyphenyl)ethyl]phenol (31)

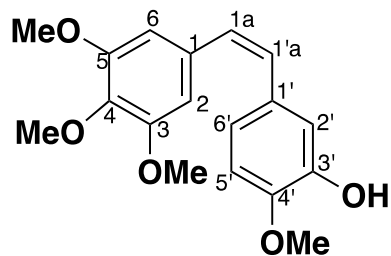

Combrerastatin A (32)

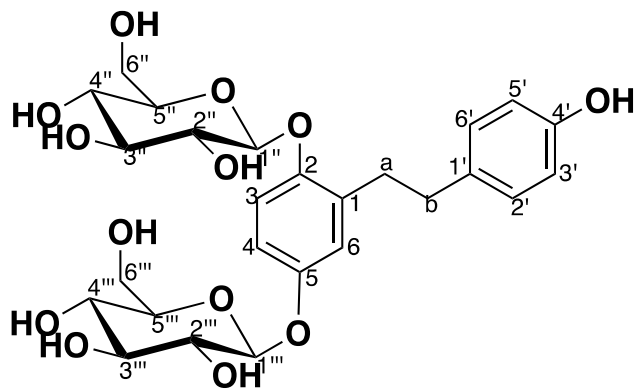

$\alpha,\beta$ -dihydrostilbene-2,4',5-triol-2,5-di( $\beta$ -D-glucopyranoside) (49)

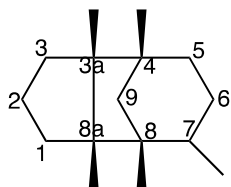

(-)-Gymnomitrene (19)

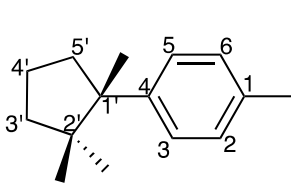

(-)-Parene (20)

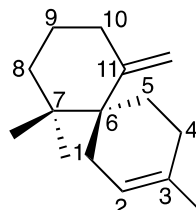

(+)- $\beta$ -Chamigrene (21)

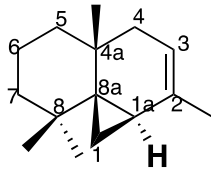

(+)-Thujopsene (22)

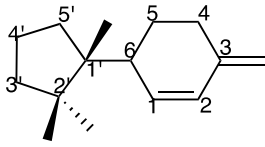

(-)- $\delta$ -Cuprenene (23)

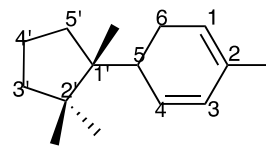

(+)- $\epsilon$ -Cuprenene (24)

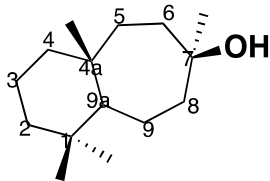

(-)-Widdrol (25)

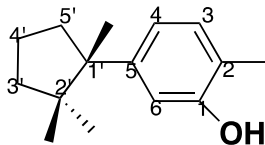

(-)- $\delta$ -Cuparenol (26)

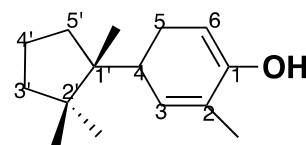

(-)- $\beta$ -Herbertenol (27)

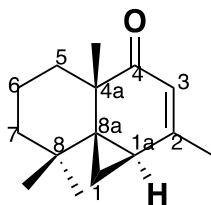

(-)-Thujopsenone (28)

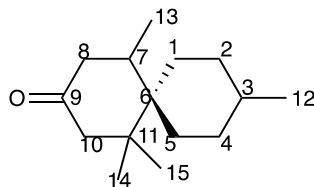

*Ent*-9-oxo- $\alpha$ -  
chamigrene (10)

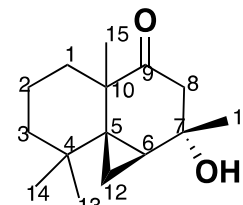

*Ent*-thujopsan-  
7 $\beta$ -ol (11)

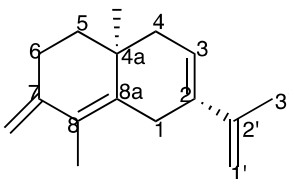

*Ent*- $\alpha$ -cyperone (12)

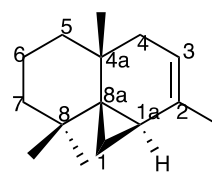

*Ent*-11-thujopsenone (13)

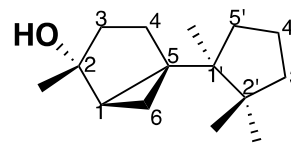

(-)-Cyclopropane  
cuparenol (14)

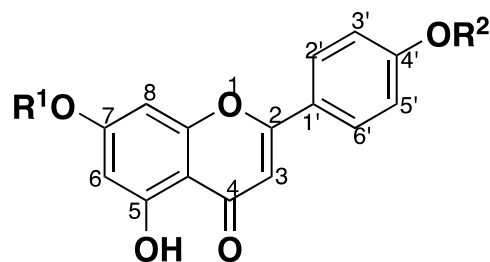

R<sup>1</sup>=H

R<sup>2</sup>=H

Apigenin (33)

R<sup>1</sup>=glucuronic acid

R<sup>2</sup>=H

Apigenin 7-glucuronide (34)

R<sup>1</sup>=glucuronic acid

R<sup>2</sup>=glucuronic acid

Apigenin 7,4'-di-O- $\beta$ -D-glucuronide (35)

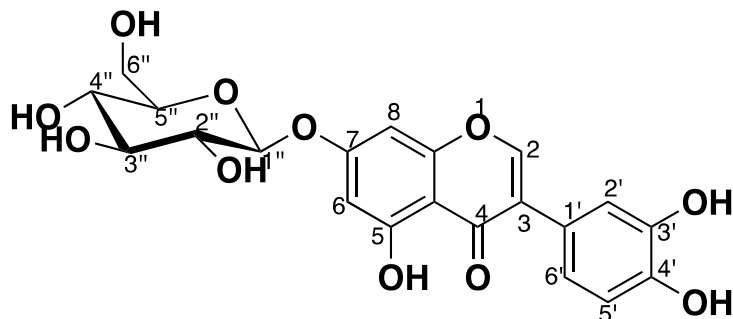

3',4',5,7-tetrahydroxyisoflavone 7-( $\beta$ -D-glucopyranoside) (**55**)

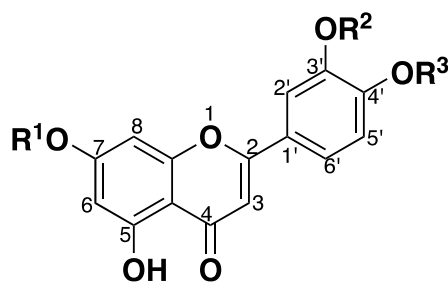

|                                 |                                 |                                 |                                                              |
|---------------------------------|---------------------------------|---------------------------------|--------------------------------------------------------------|
| R <sup>1</sup> =H               | R <sup>2</sup> =H               | R <sup>3</sup> =H               | Luteolin ( <b>36</b> )                                       |
| R <sup>1</sup> =glucuronic acid | R <sup>2</sup> =H               | R <sup>3</sup> =H               | Luteolin 7-glucuronide ( <b>37</b> )                         |
| R <sup>1</sup> =H               | R <sup>2</sup> =glucuronic acid | R <sup>3</sup> =H               | Luteolin 3'-O- $\beta$ -D-glucuronide ( <b>38</b> )          |
| R <sup>1</sup> =glucuronic acid | R <sup>2</sup> =glucuronic acid | R <sup>3</sup> =H               | Luteolin 7,3'-diglucuronide ( <b>39</b> )                    |
| R <sup>1</sup> =glucuronic acid | R <sup>2</sup> =H               | R <sup>3</sup> =glucuronic acid | Luteolin 7,4'-diglucuronide ( <b>40</b> )                    |
| R <sup>1</sup> =H               | R <sup>2</sup> =glucuronic acid | R <sup>3</sup> =glucuronic acid | Luteolin 3',4'-O- $\beta$ -D-diglucuronide ( <b>41</b> )     |
| R <sup>1</sup> =glucuronic acid | R <sup>2</sup> =glucuronic acid | R <sup>3</sup> =glucuronic acid | Luteolin 7,3',4'-tri-O- $\beta$ -D-glucuronide ( <b>42</b> ) |

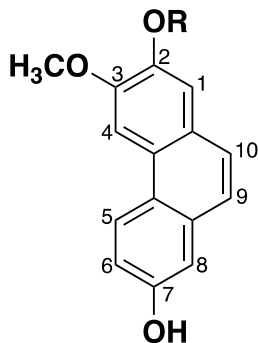

R=OCH<sub>3</sub> 2,3-dimethoxy-7-hydroxyphenanthrene (**43**)  
 R=H 2,7-dimethoxy-3-hydroxyphenanthrene (**44**)

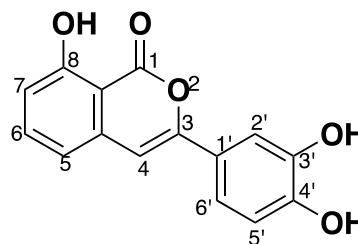

3-(3,4-dihydroxyphenyl)-8-hydroxyisocoumarin (**48**)



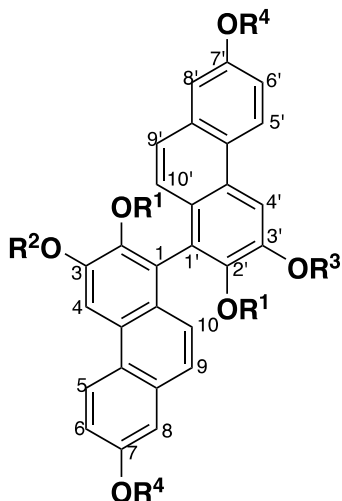

$R^1 = R^4 = H, R^2 = R^3 = OCH_3$  3,3 $\phi$ -dimethoxy-2,2 $\phi$ ,7,7 $\phi$ -tetrahydroxy-1,1 $\phi$ -biphenanthrene (**45**)

$R^1 = R^3 = R^4 = H, R^2 = OCH_3$  3-methoxy-2,2 $\phi$ ,3 $\phi$ ,7,7 $\phi$ -pentahydroxy-1,1 $\phi$ -biphenanthrene (**46**)

$R^1 = R^3 = R^2 = R^4 = OH$  2,2 $\phi$ ,3,3 $\phi$ ,7,7 $\phi$ -hexahydroxy-1,1 $\phi$ -biphenanthrene (**47**)

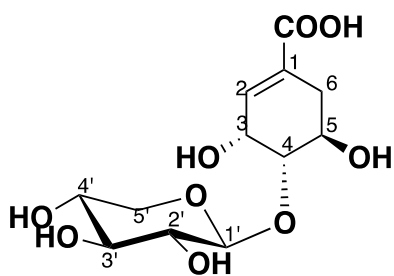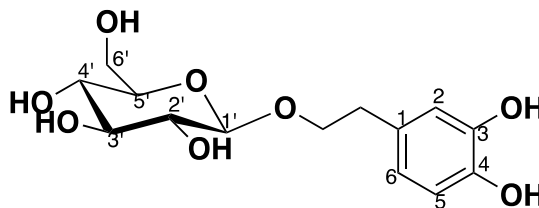

Shikimic acid 4- $\beta$ -D-xylopyranoside (**50**) 2-(3,4-dihydroxyphenyl)ethyl- $\beta$ -D-glucopyranoside (**54**)

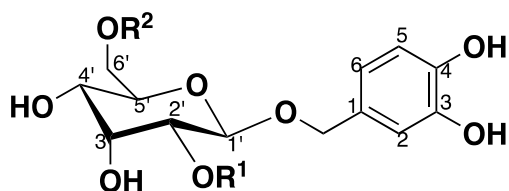

$R^1 = \alpha\text{-Rahp}$   $R^2 = H$  2-(3,4-dihydroxyphenyl)ethyl-O- $\alpha$ -L-rhamnopyranosyl-(1 $\rightarrow$ 2)- $\beta$ -D-allopyranoside (**51**)

$R^1 = H$   $R^2 = \beta\text{-Xylp}$  2-(3,4-dihydroxyphenyl)ethyl-O- $\beta$ -D-xylopyranosyl-(1 $\rightarrow$ 6)- $\beta$ -D-allopyranoside (**52**)

$R^1 = H$   $R^2 = H$  2-(3,4-dihydroxyphenyl)ethyl- $\beta$ -D-allopyranoside (**53**)

Figure S-2. Compounds reported in Vietnamese *Marchantia polymorpha* L.

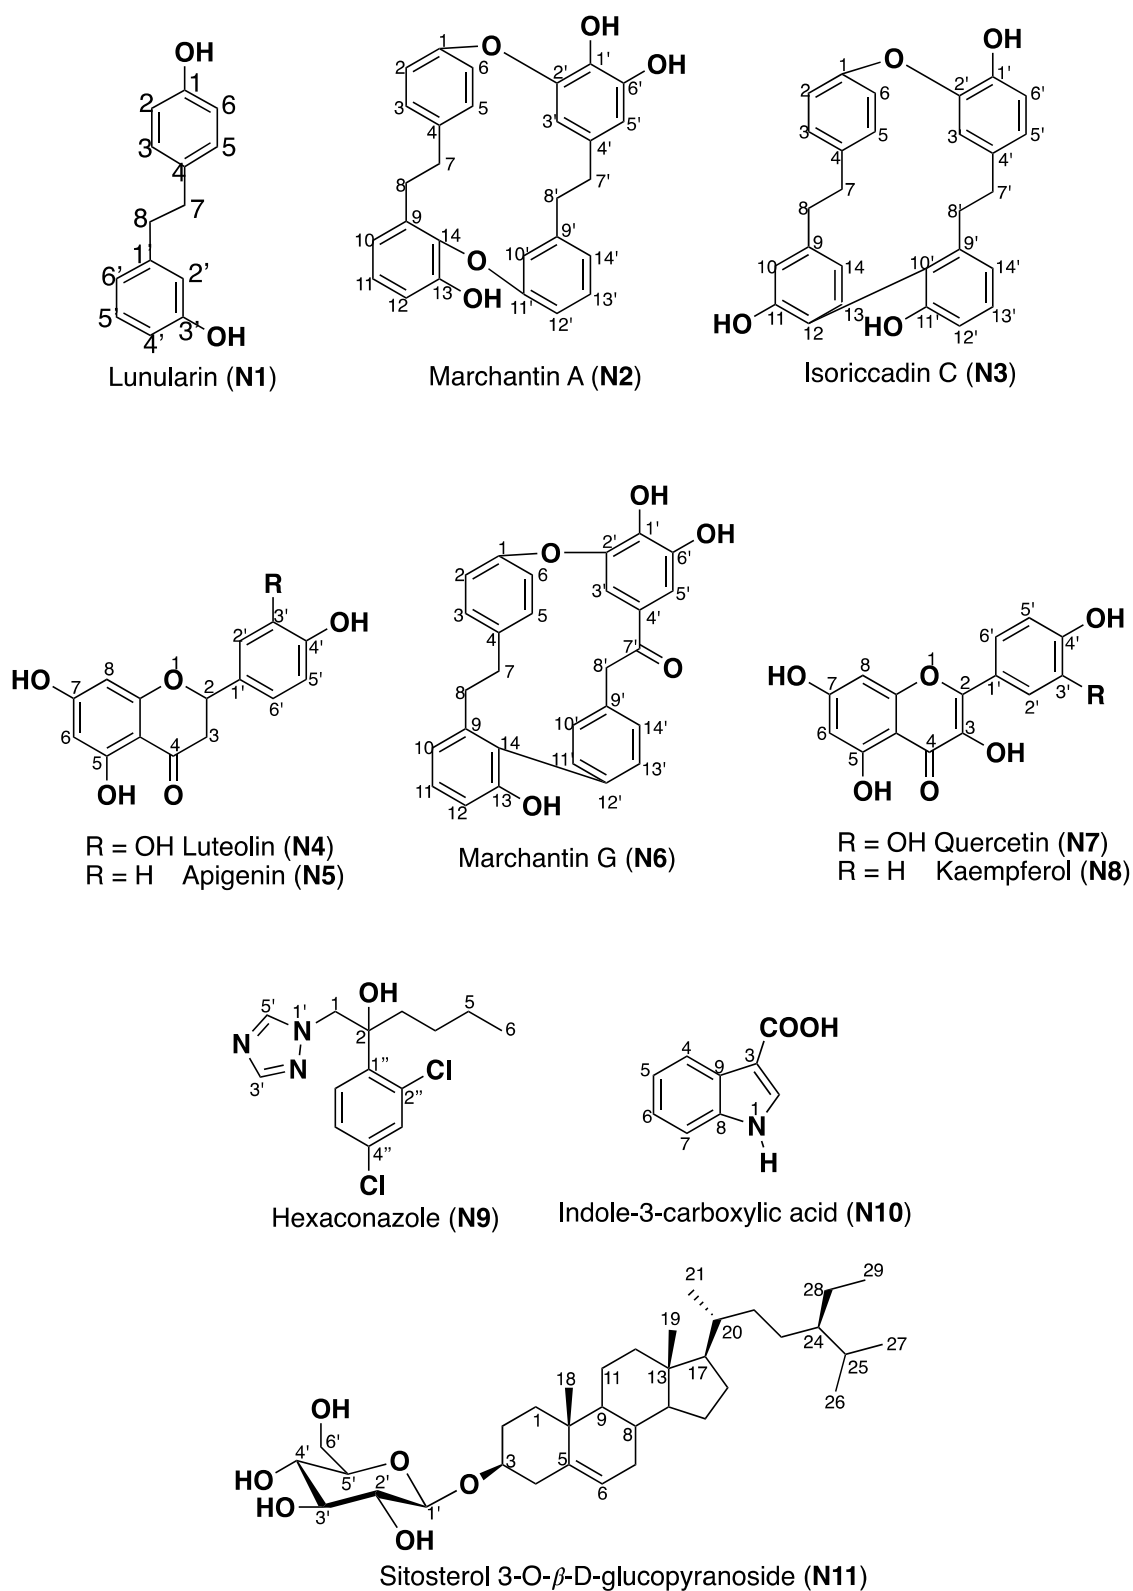

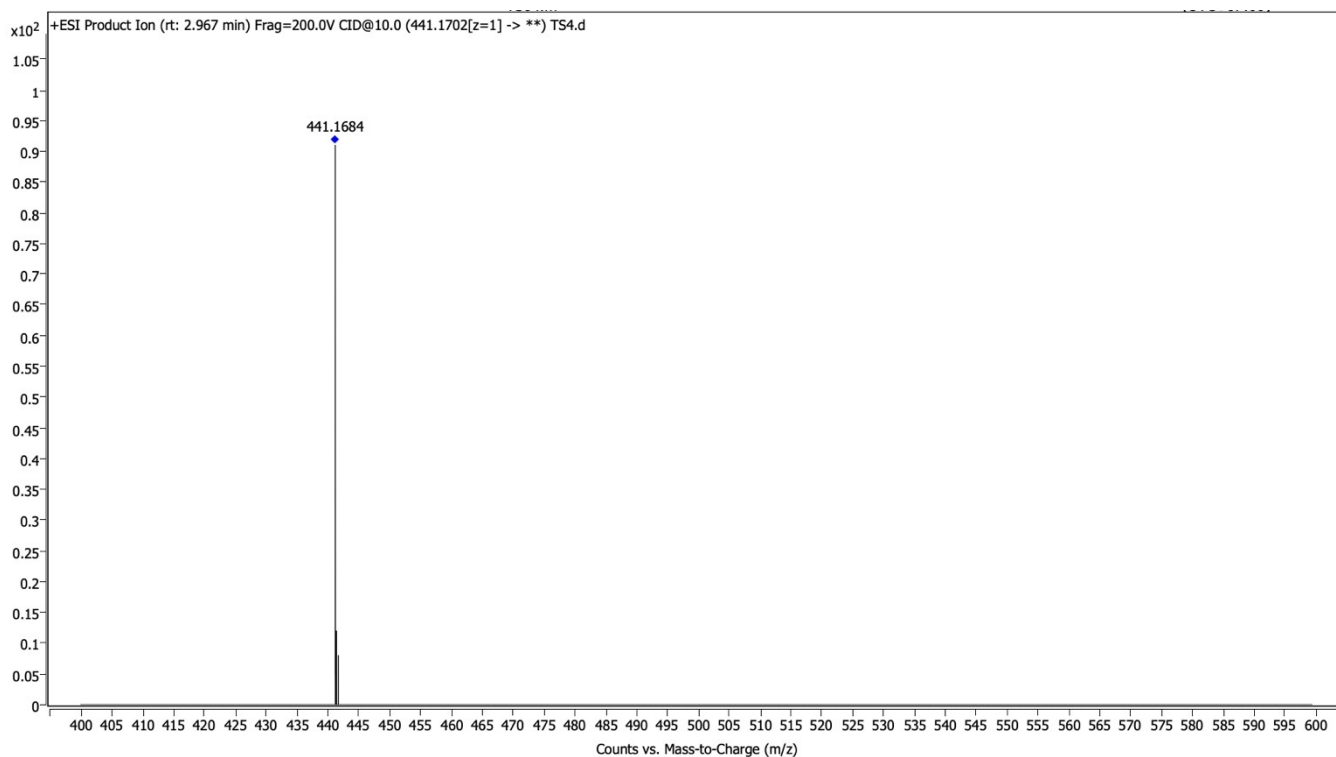

**Figure S-3A.** The HRESIMS spectrum of **1**.

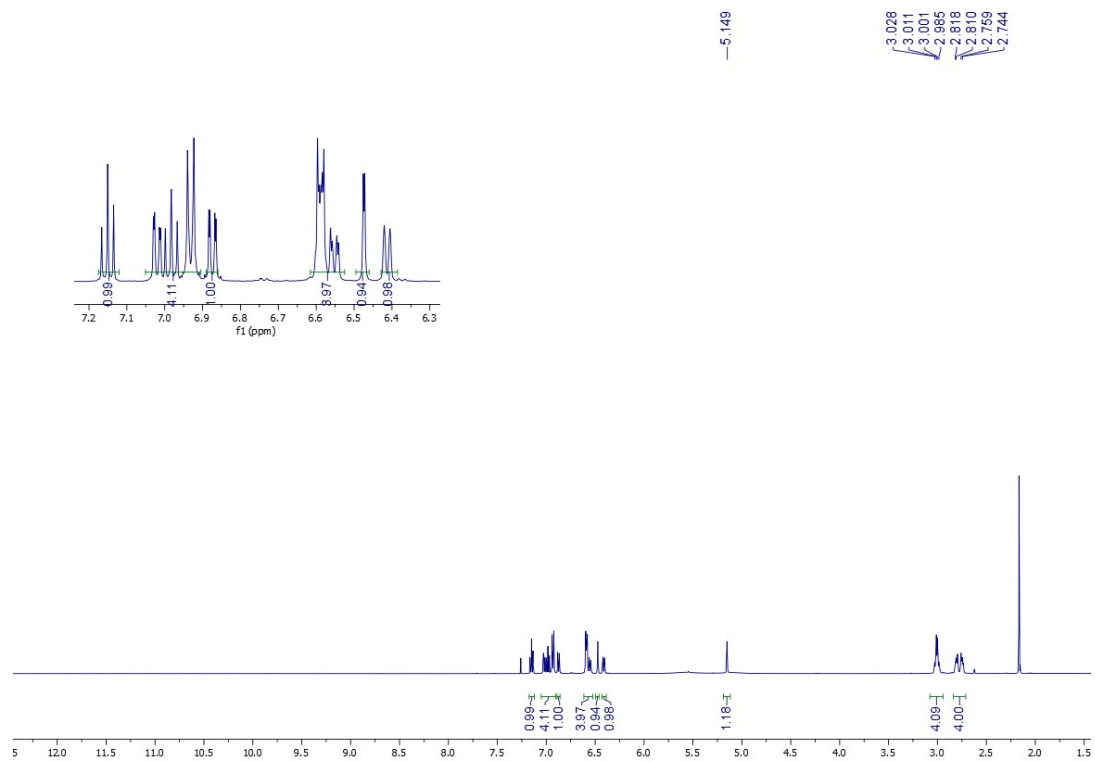

**Figure S-3B.** The <sup>1</sup>H NMR spectrum of **1** in acetone-*d*<sub>6</sub>

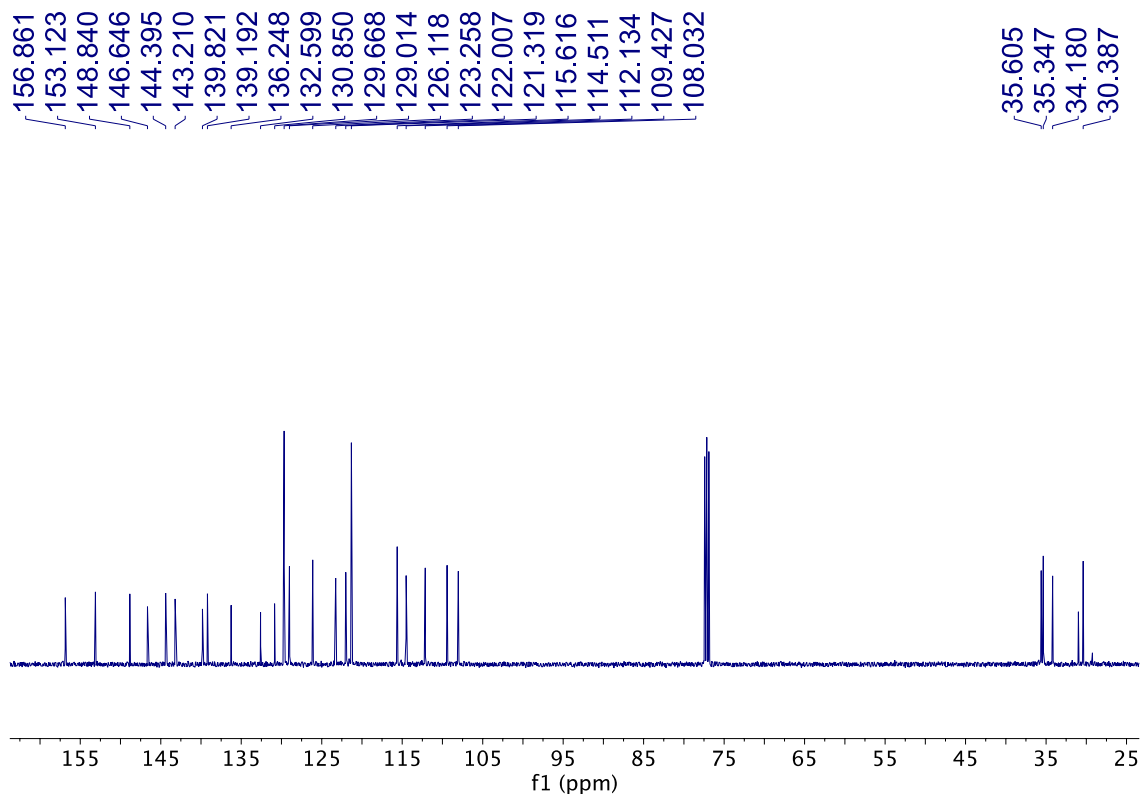

**Figure S-3C.** The  $^{13}\text{C}$ -NMR spectrum of **1** in  $\text{CDCl}_3$ .

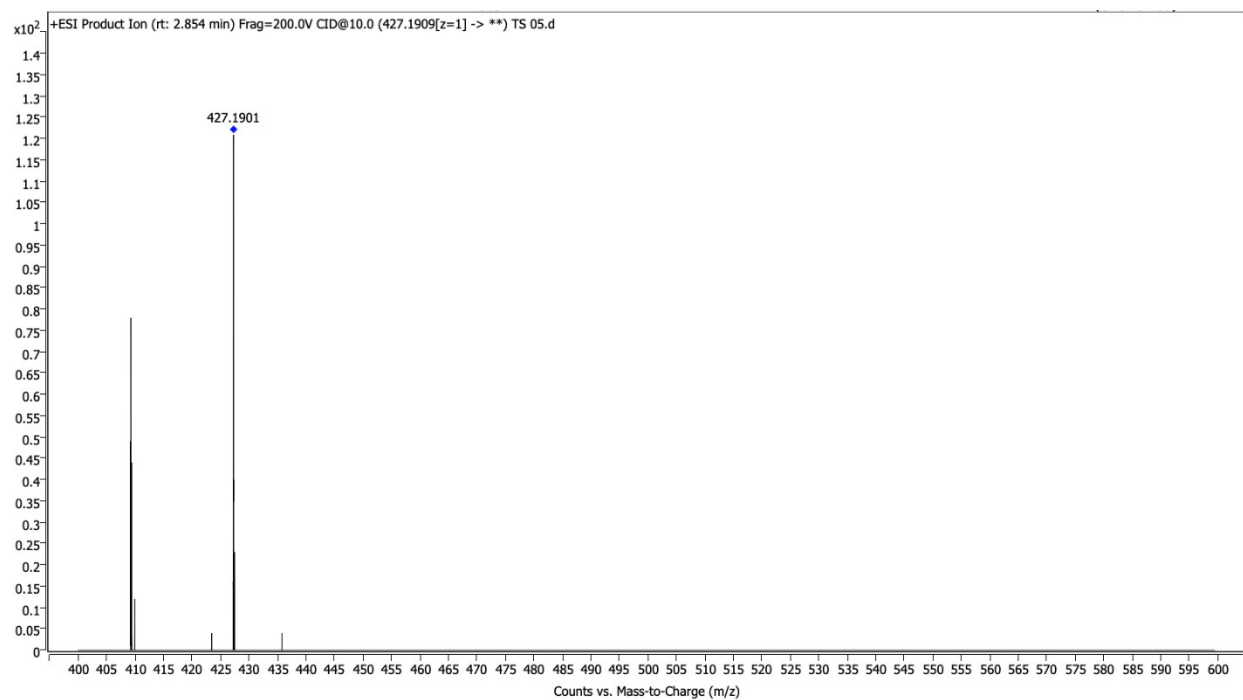

Figure S-4A. The HRESIMS spectrum of **2**.

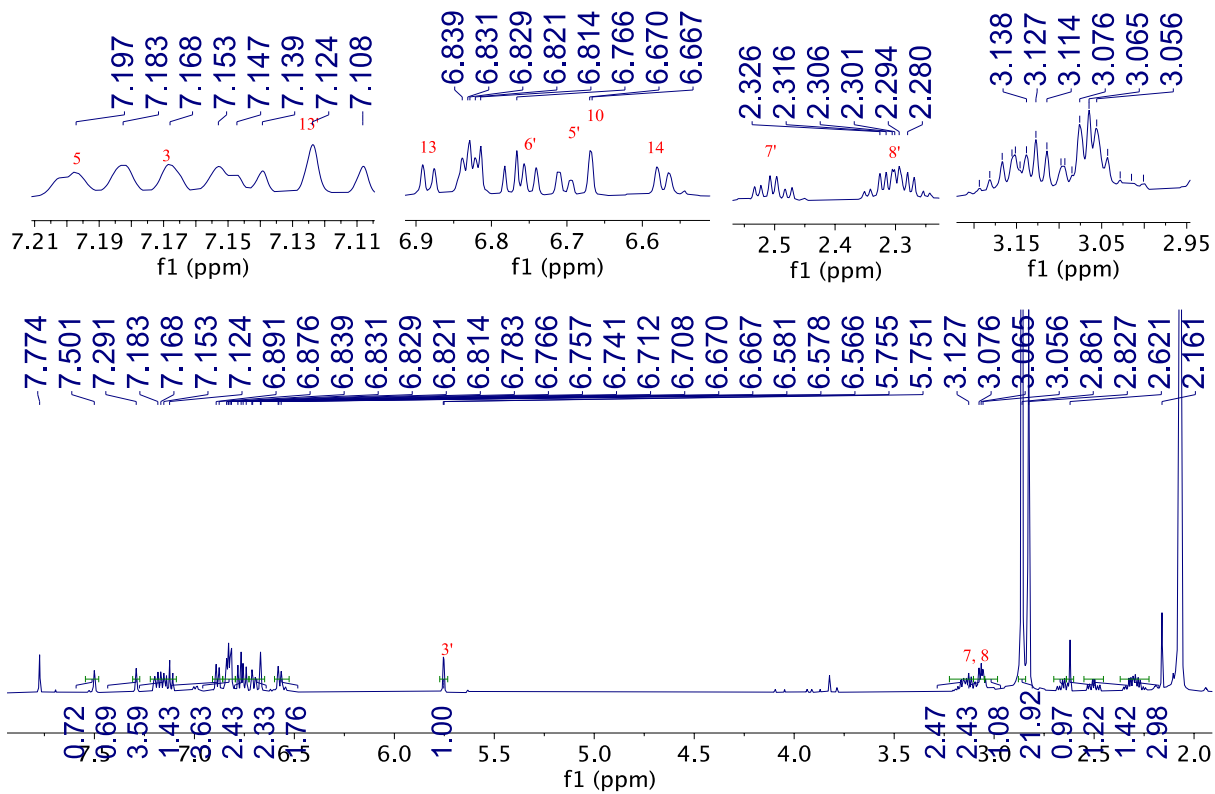

Figure S-4B. The <sup>1</sup>H NMR spectrum of **2** in acetone-*d*<sub>6</sub>.

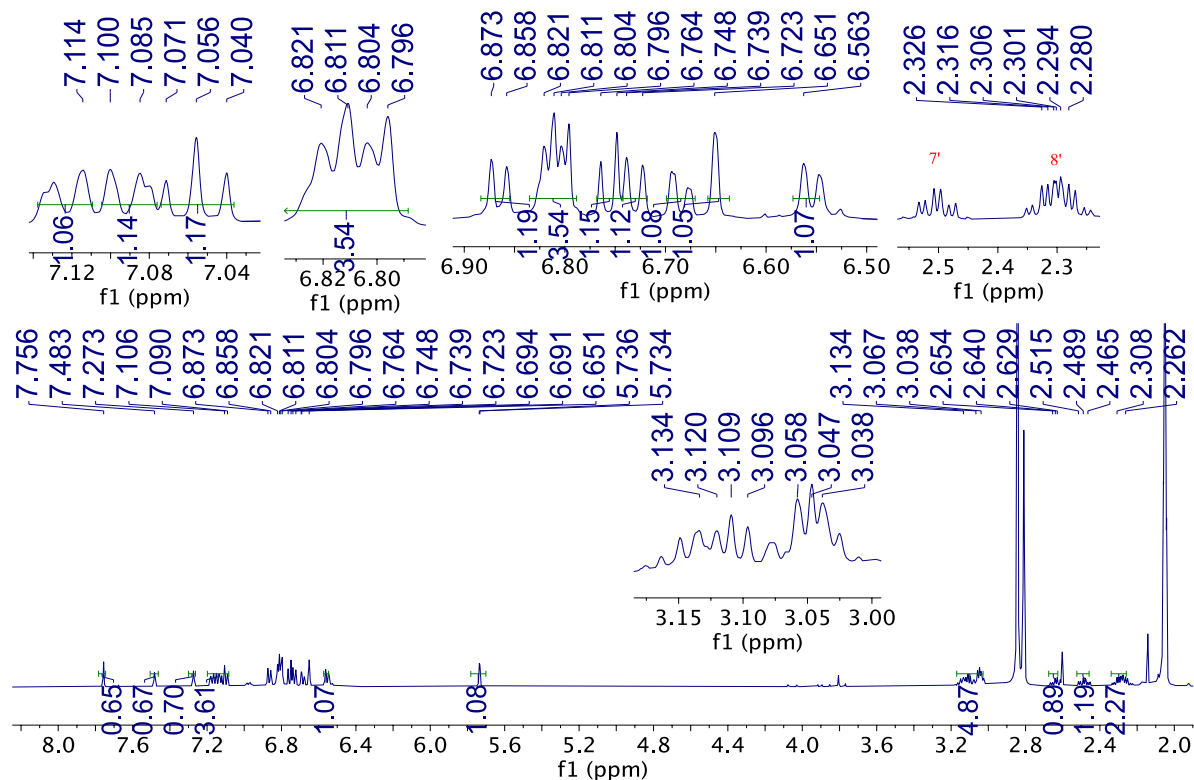

Figure S-4C. The  $^1\text{H}$  NMR spectrum of **2** in acetone- $d_6$ .

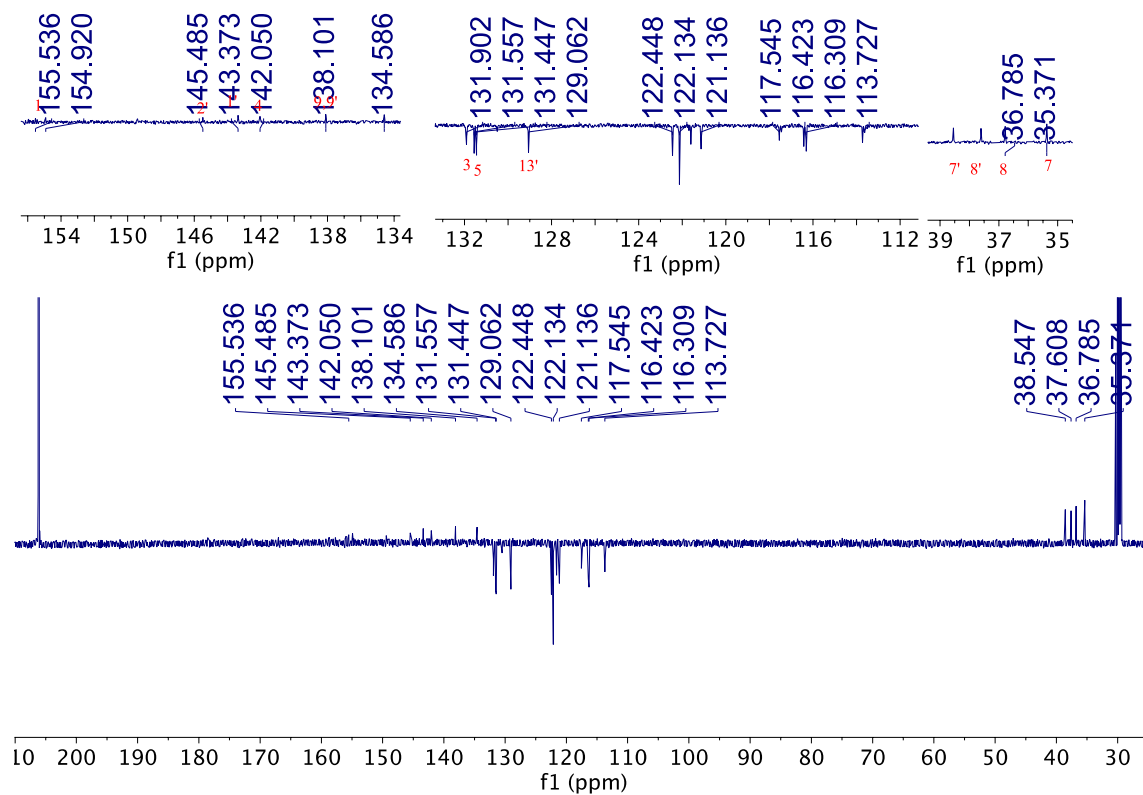

Figure S-4D. The  $^{13}\text{C}$  NMR spectrum of **2** in acetone- $d_6$ .

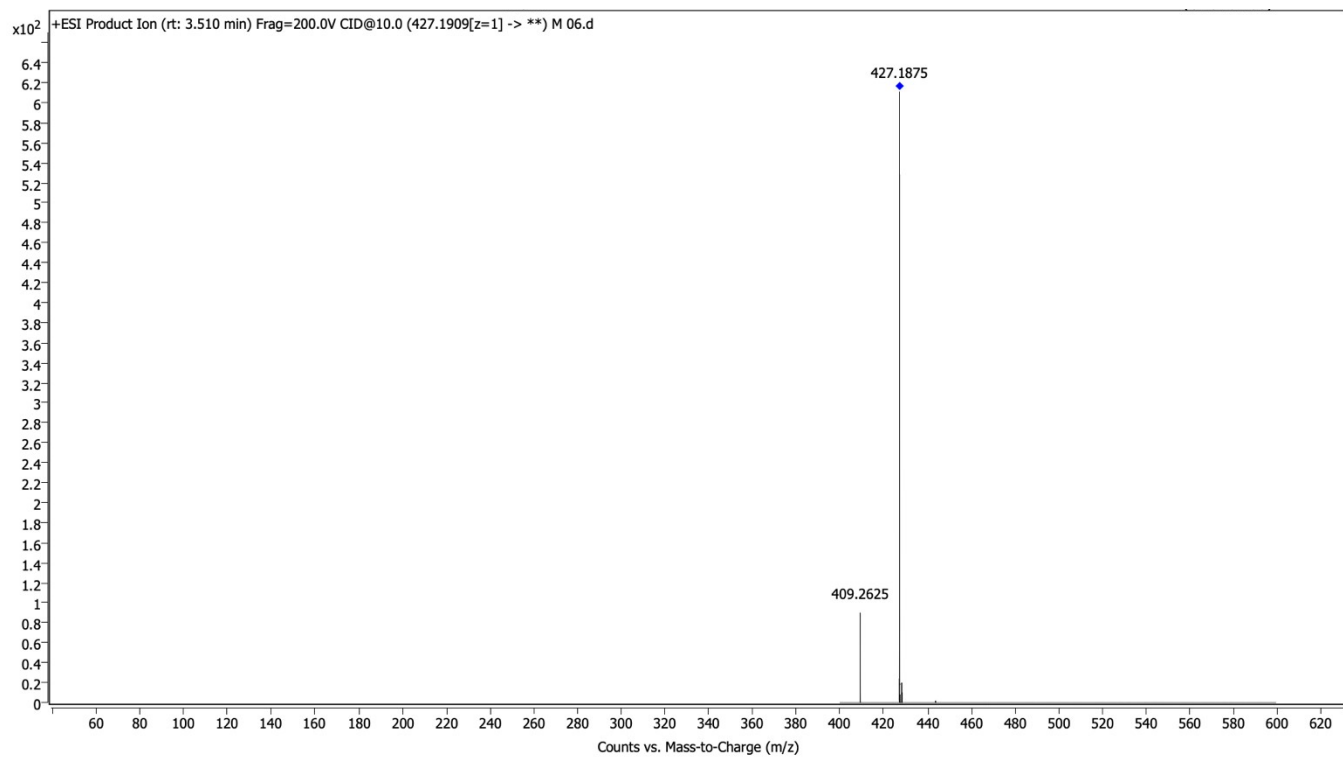

**Figure S-5A.** The HRESIMS spectrum of **3**.

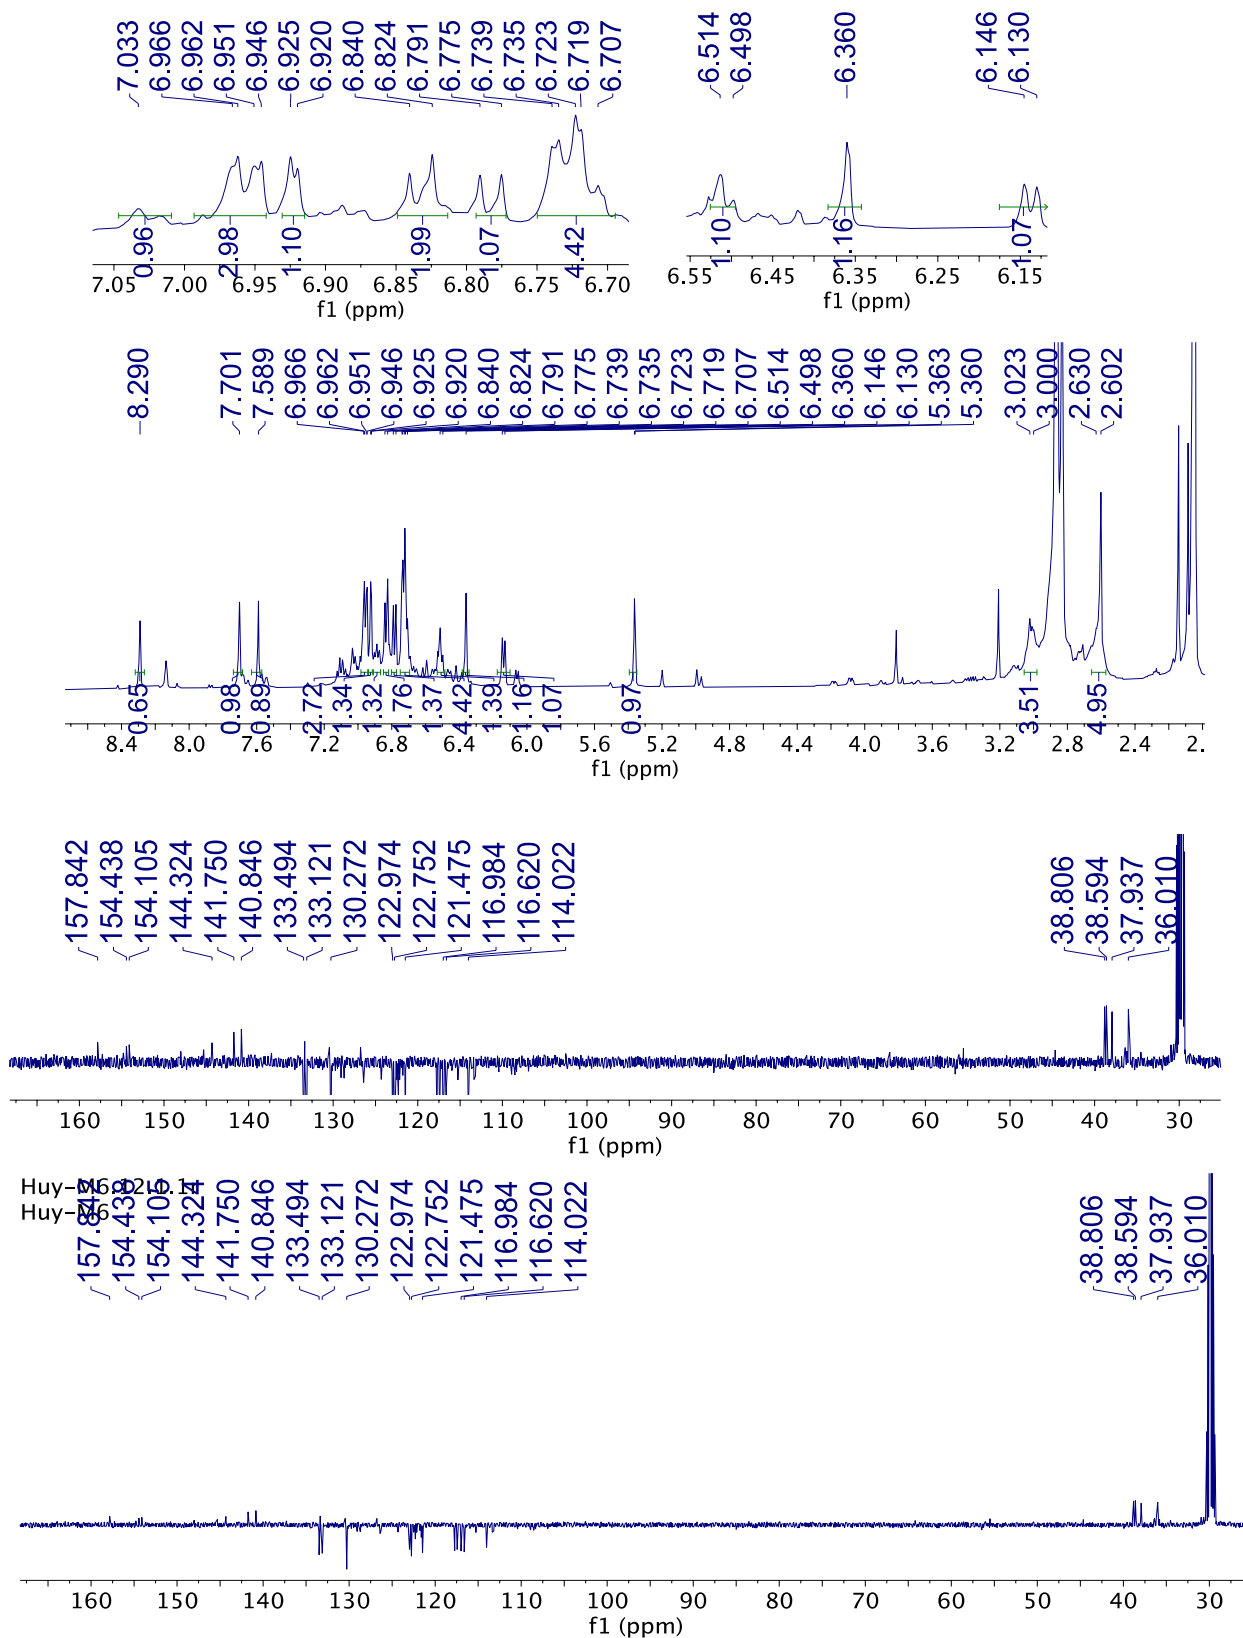

Figure S-5B. The  $^1\text{H}$  NMR spectrum of **3** in acetone- $d_6$ .



Figure S-5C. The  $^{13}\text{C}$  NMR spectrum of **3** in acetone- $d_6$ .

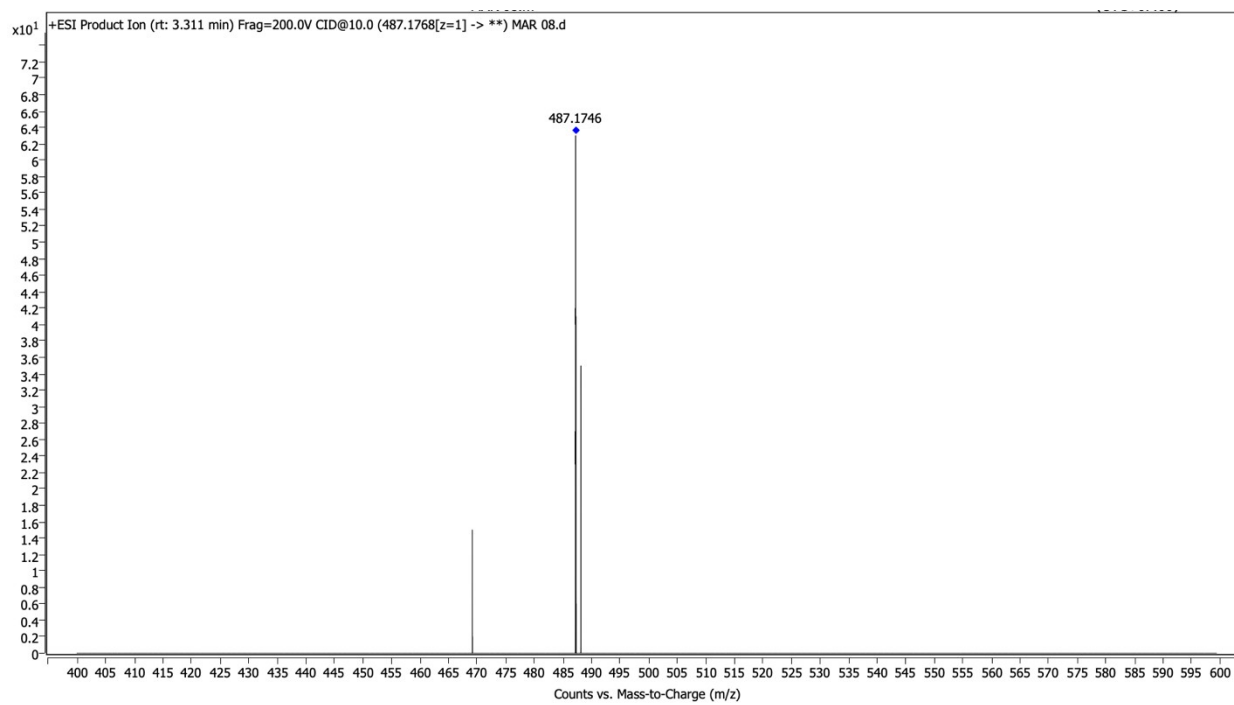

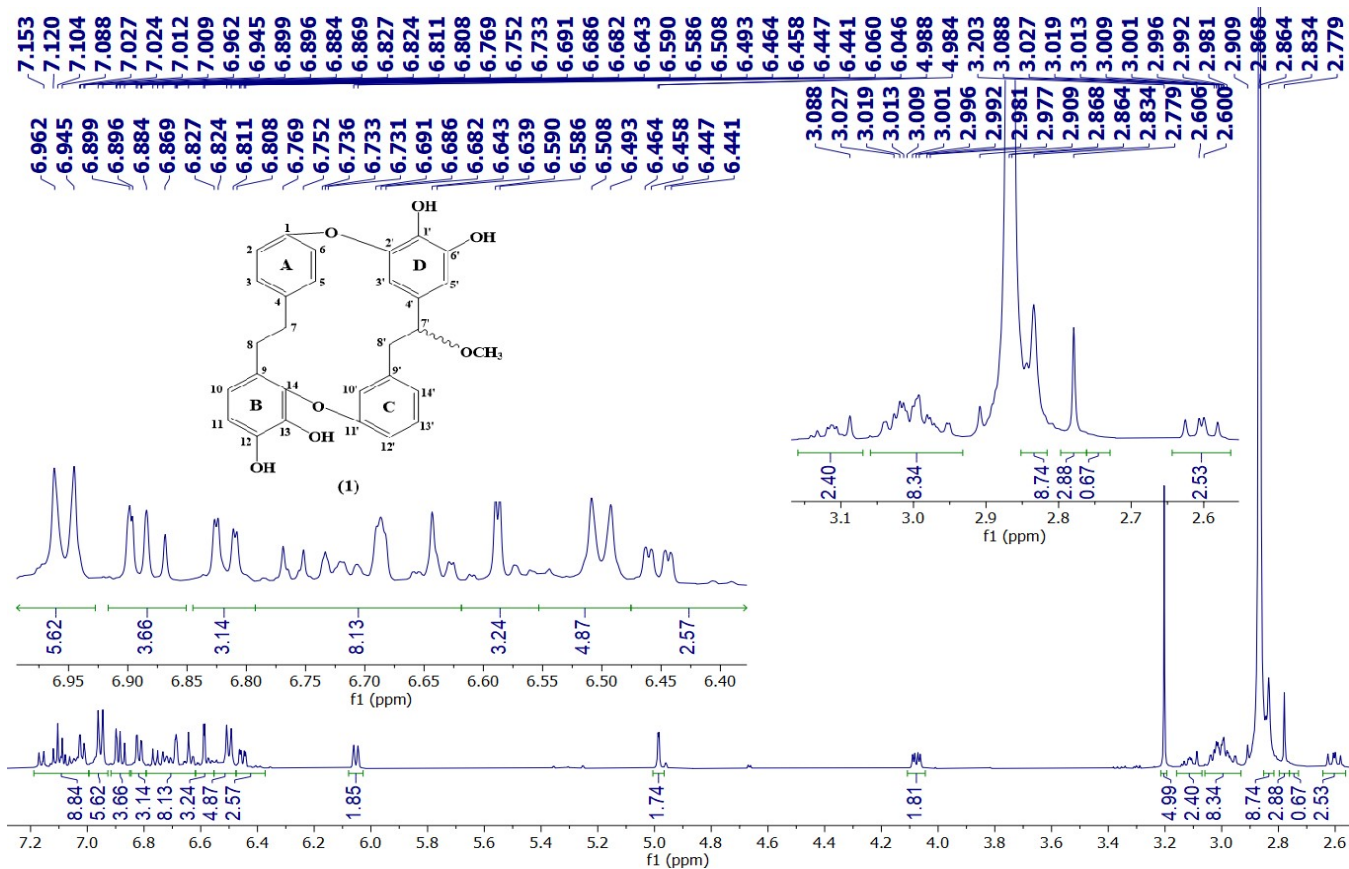

Figure S-6A. The HRESIMS spectrum of 4.

Figure S-6B. The  $^1\text{H}$  NMR spectrum of 4 in acetone- $d_6$ .

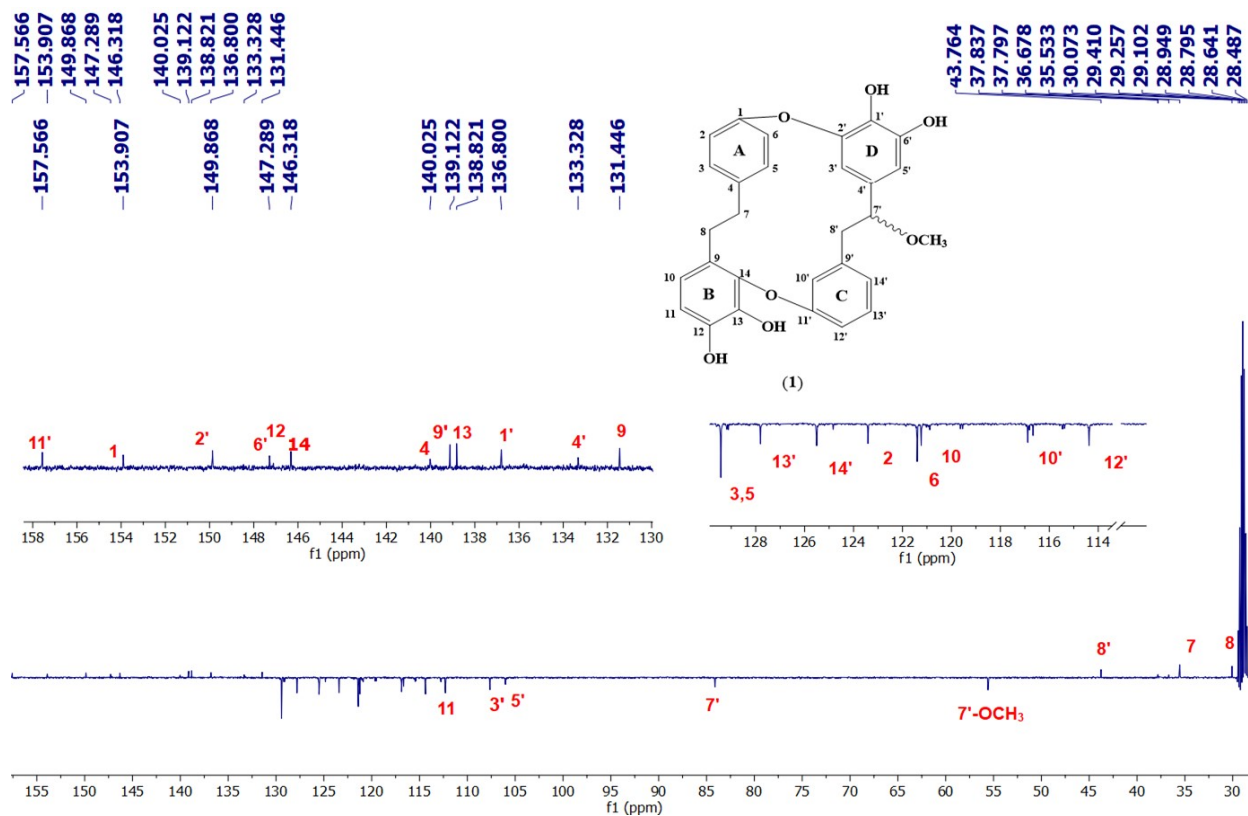

Figure S-6C. The <sup>13</sup>C NMR spectrum of **4** in acetone-*d*<sub>6</sub>.

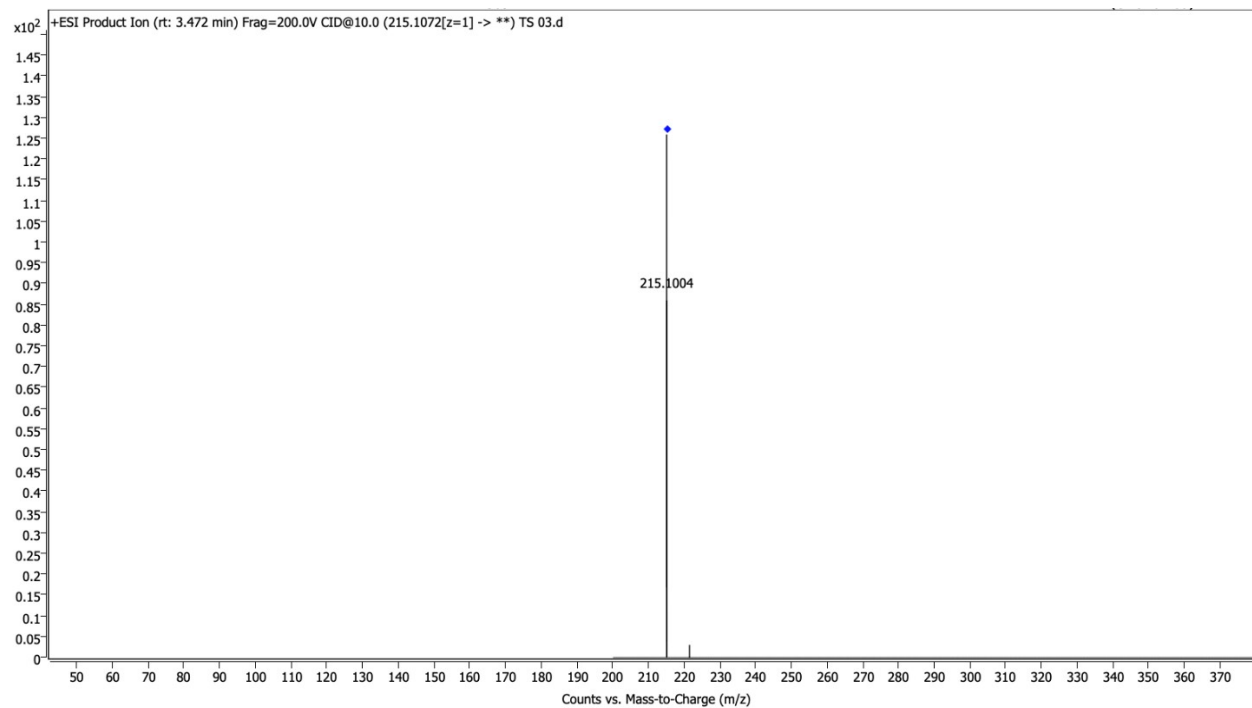

Figure S-7A. The HRESIMS spectrum of **5**.

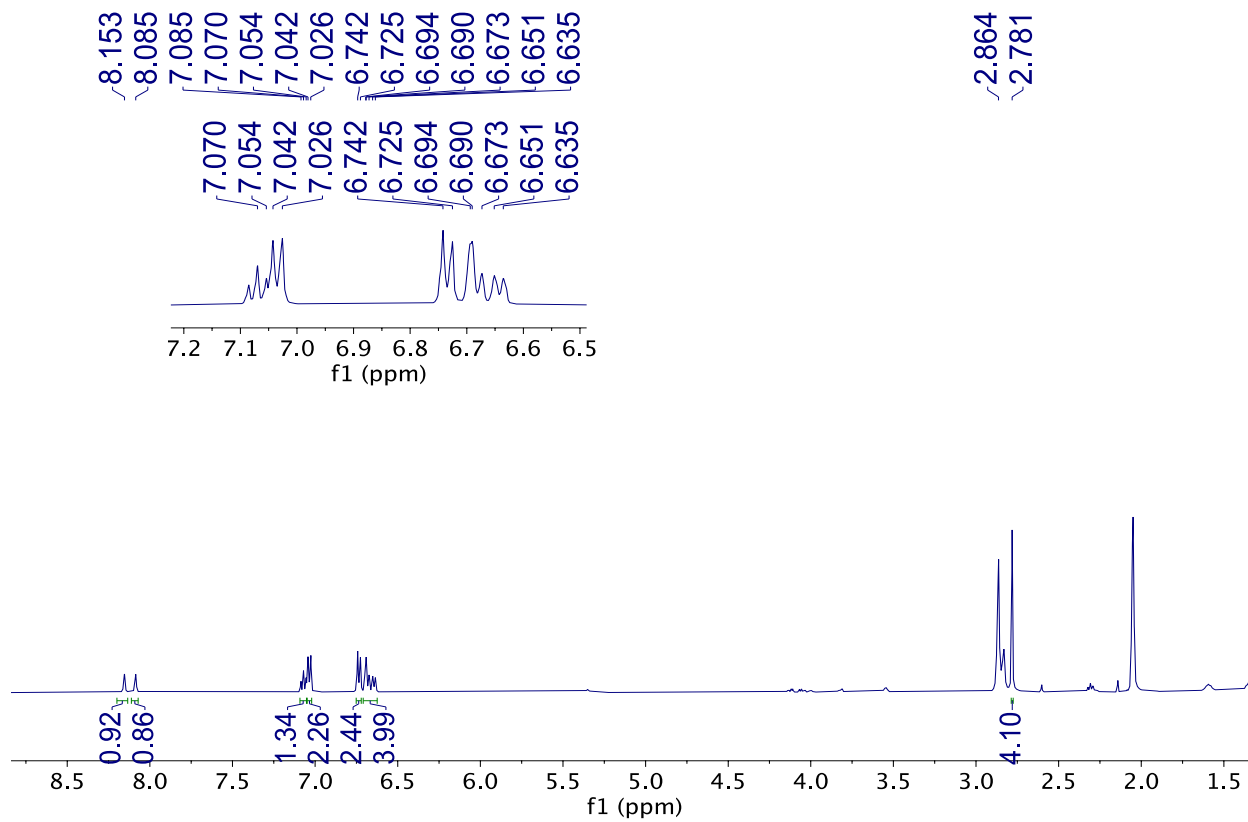

**Figure S-7B.** The <sup>1</sup>H NMR spectrum of **5** in acetone-d<sub>6</sub>.

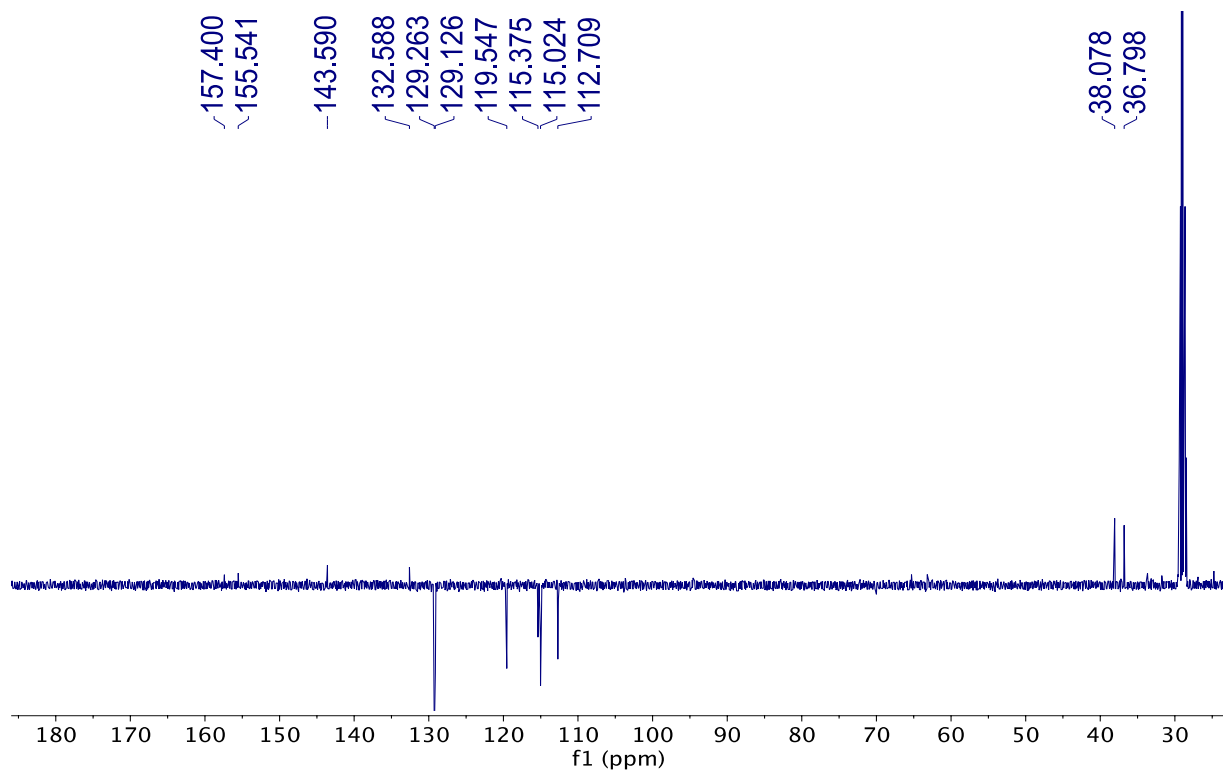

Figure S-7C. The  $^{13}\text{C}$  NMR spectrum of **5** in acetone- $d_6$ .

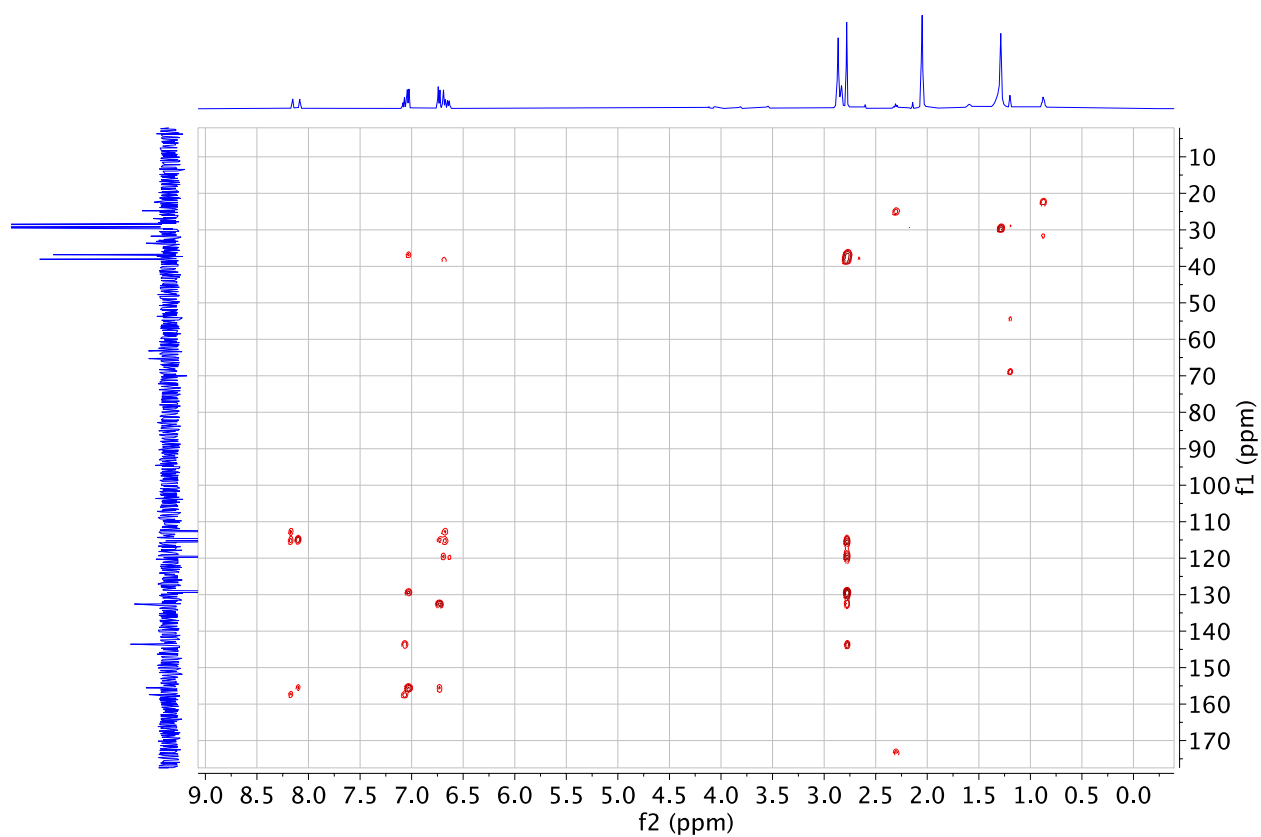

Figure S-7D. The HMBC spectrum of **5** in acetone- $d_6$ .

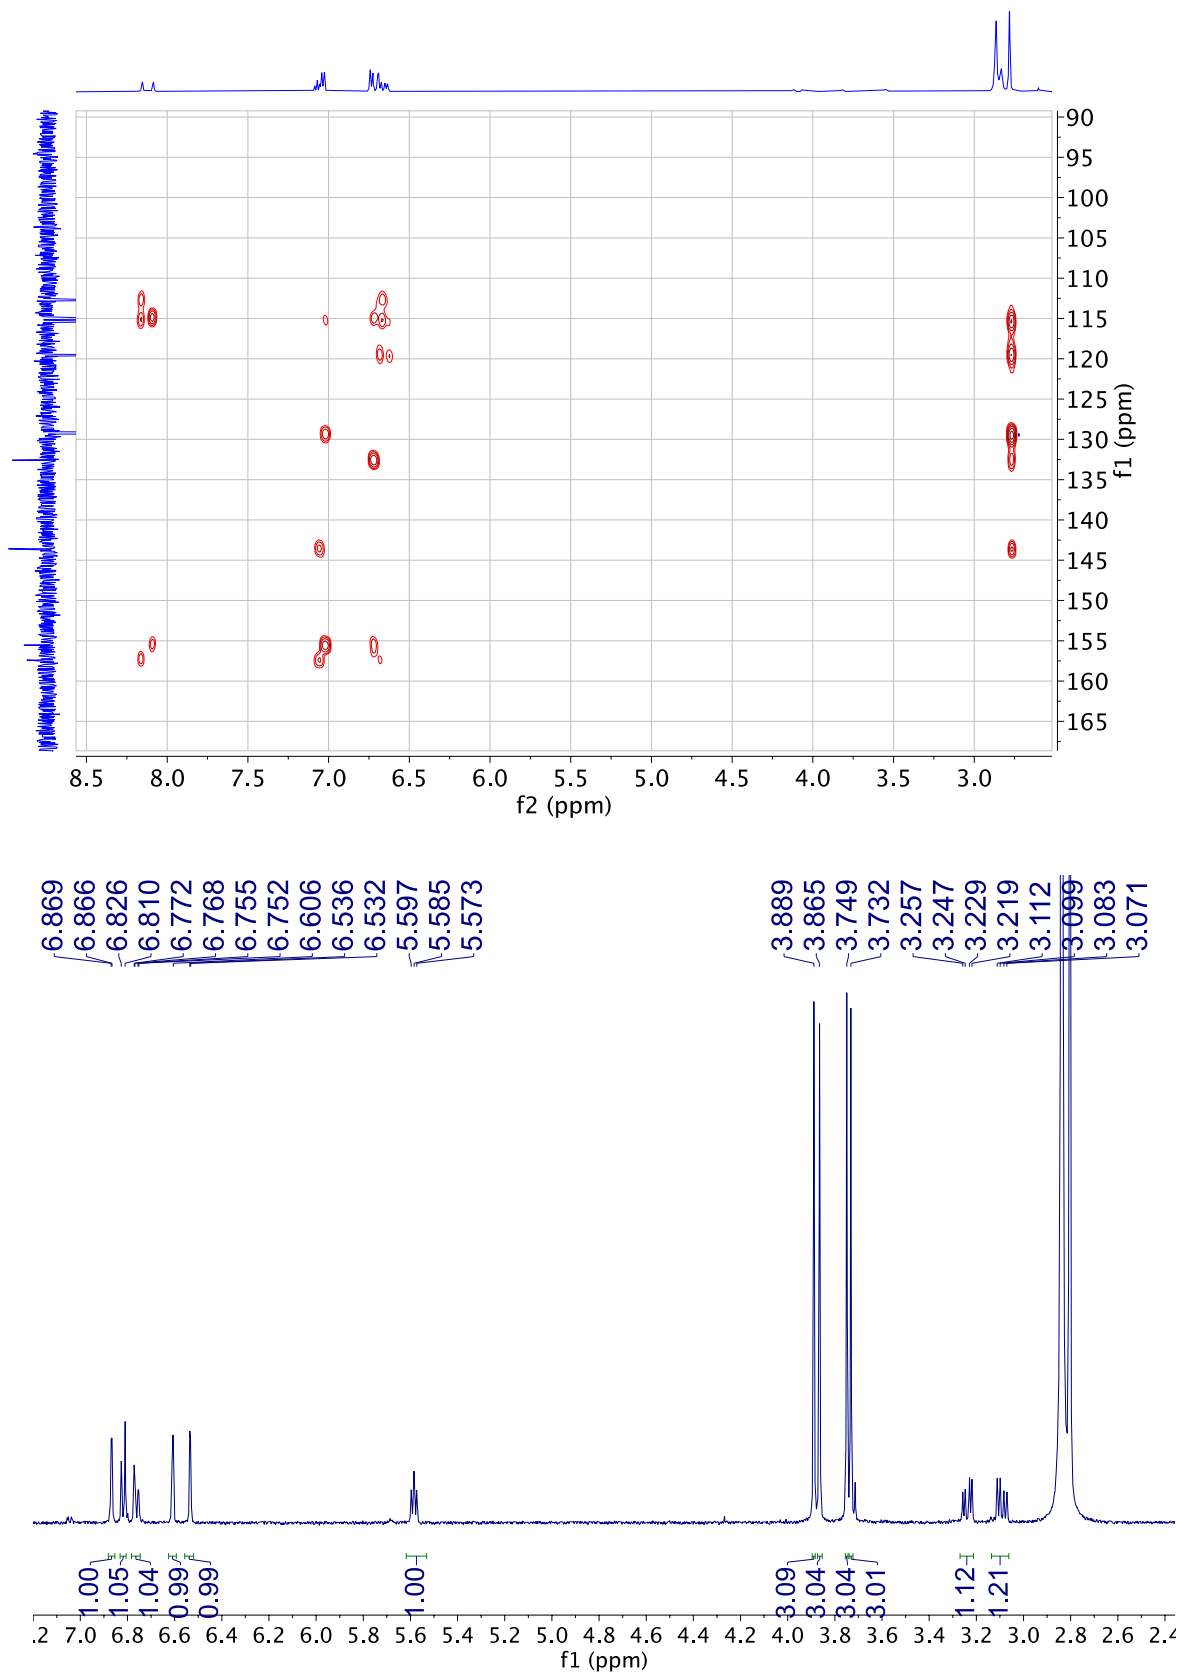

**Figure S-7E.** The HMBC spectrum of **5** in acetone- $d_6$

Figure S-8A. The  $^1\text{H}$  NMR spectrum of **6** in acetone- $d_6$ .

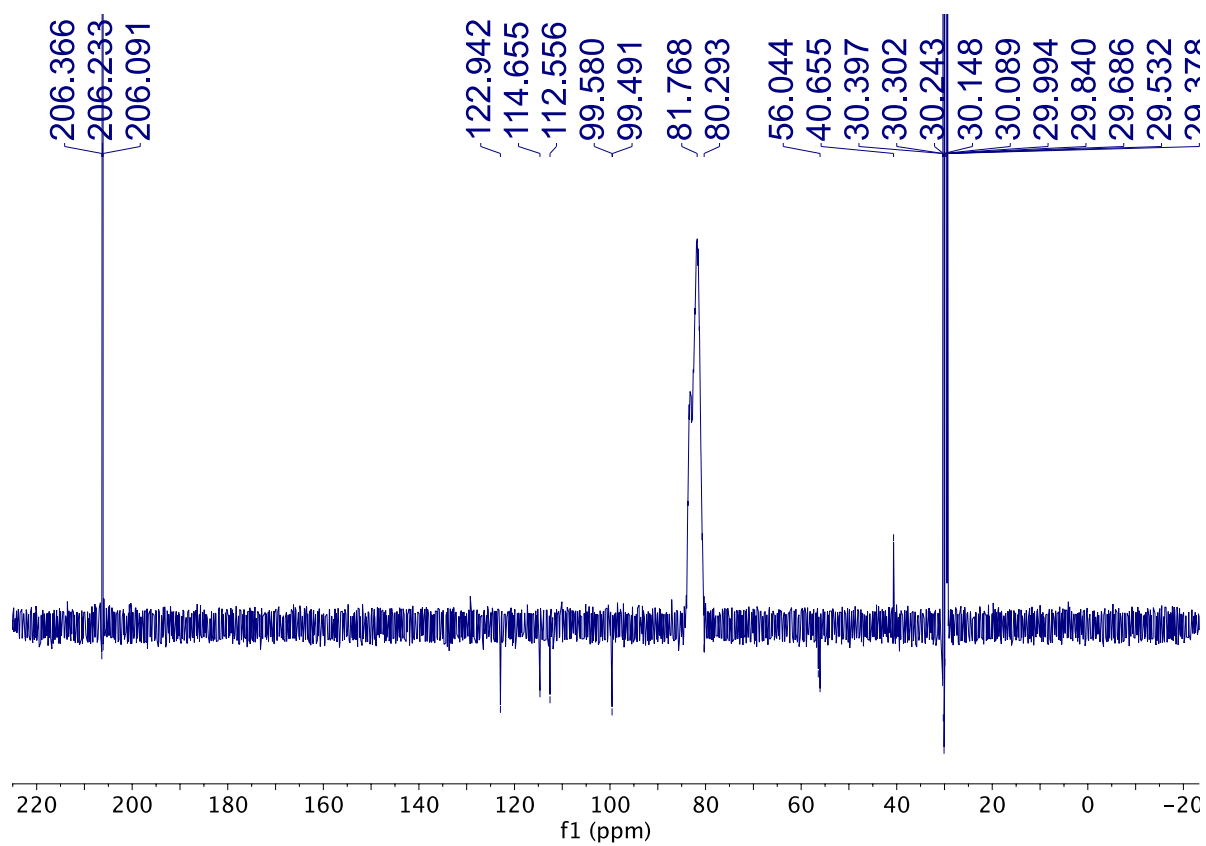

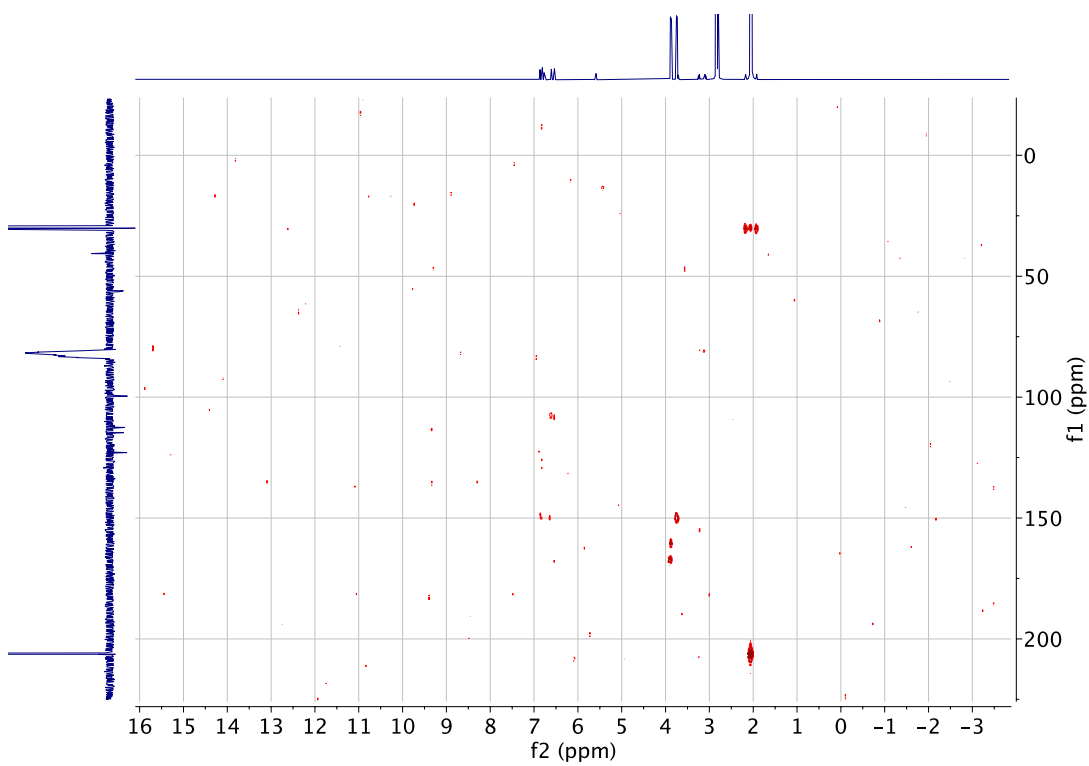

**Figure S-8B.** The  $^{13}\text{C}$  NMR spectrum of **6** in acetone- $d_6$ .

**Figure S-8C.** The HMBC spectrum of **6** in acetone- $d_6$ .



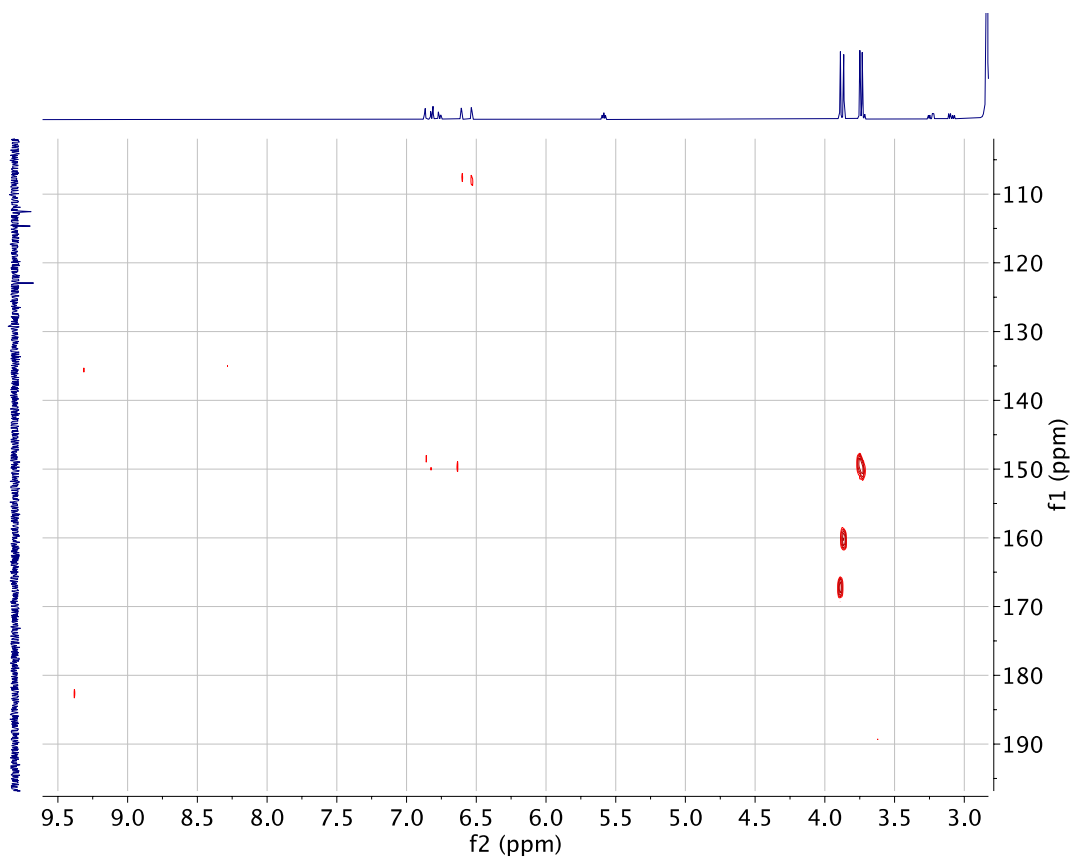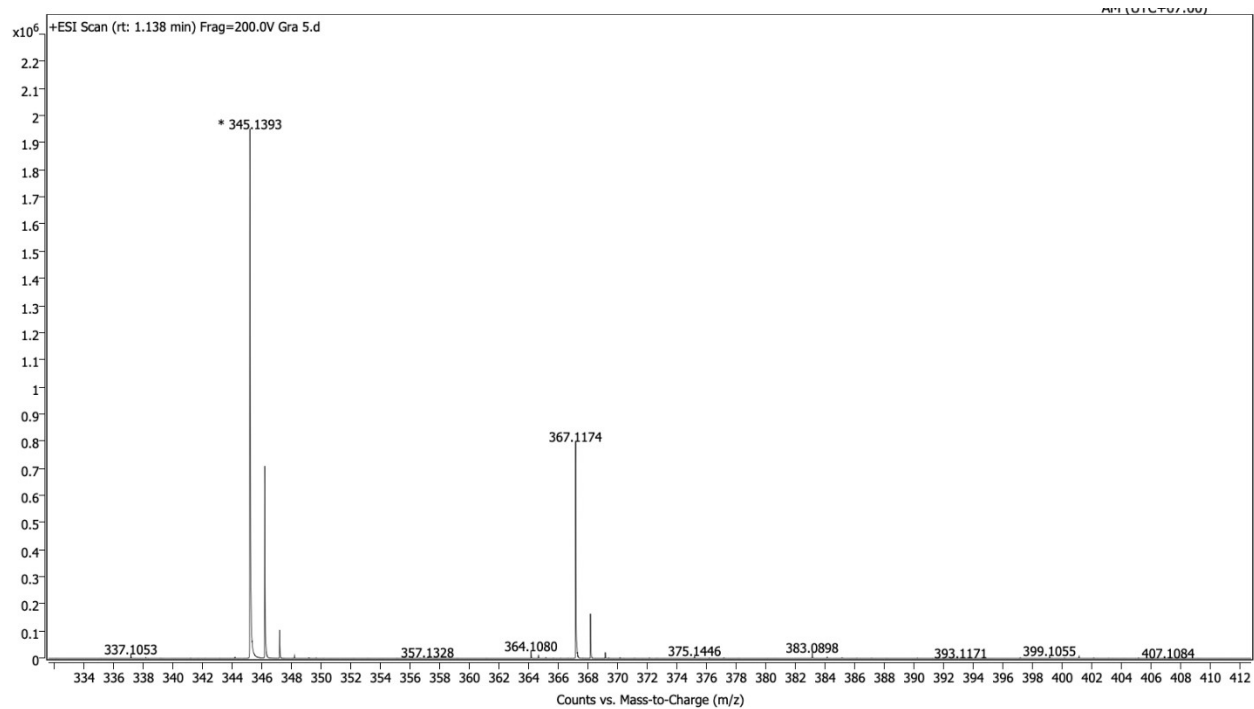

# User Spectrum Plot Report

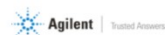

|                |         |              |                           |                 |                                                     |
|----------------|---------|--------------|---------------------------|-----------------|-----------------------------------------------------|
| Name           | RE 27   | Rack Pos.    | Instrument                | 6545B           | Operator                                            |
| Inj. Vol. (ul) | 3       | Plate Pos.   | IRM Status                | All ions missed |                                                     |
| Data File      | RE 27.d | Method (Acq) | THAY TRI 11062023 RE 27.m | Comment         | Acq. Time (Local) 11/06/2023 4:37:56 PM (UTC+07:00) |

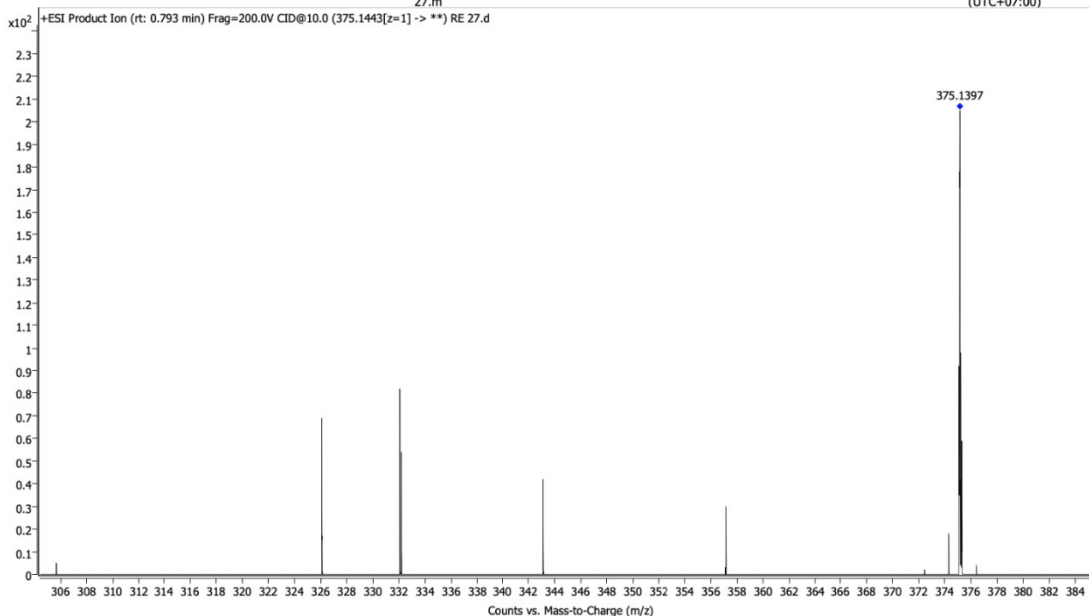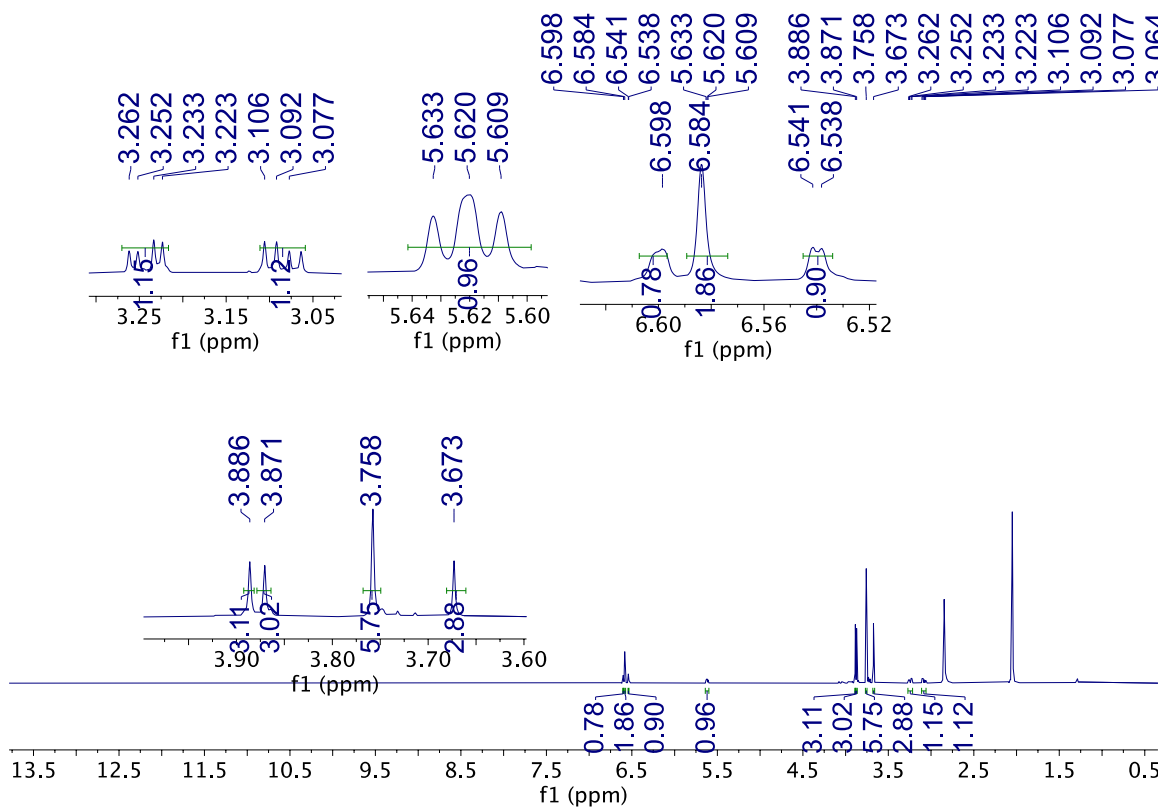

Figure S-9A. The HRESIMS spectrum of 7.

Figure S-9B. The  $^1\text{H}$  NMR spectrum of **7** in acetone- $d_6$ .

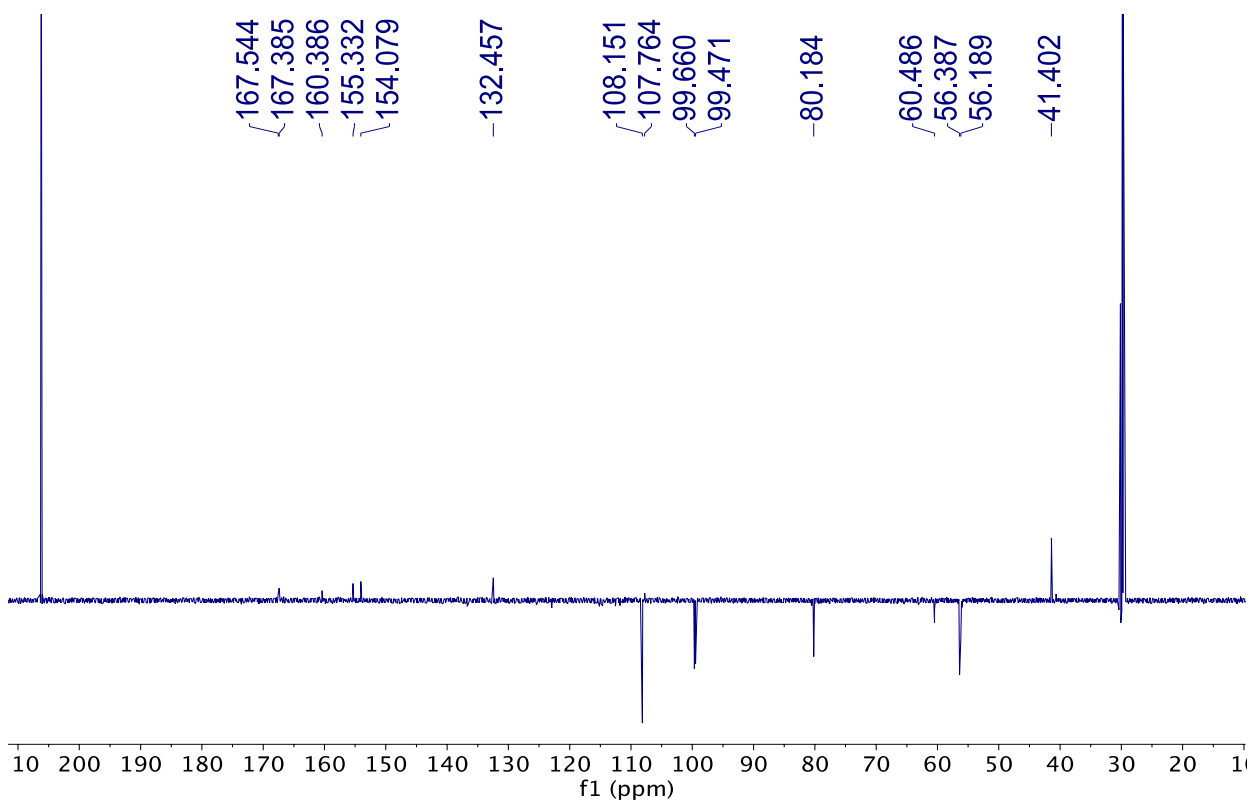

Figure S-9C. The  $^{13}\text{C}$  NMR spectrum of **7** in acetone- $d_6$ .

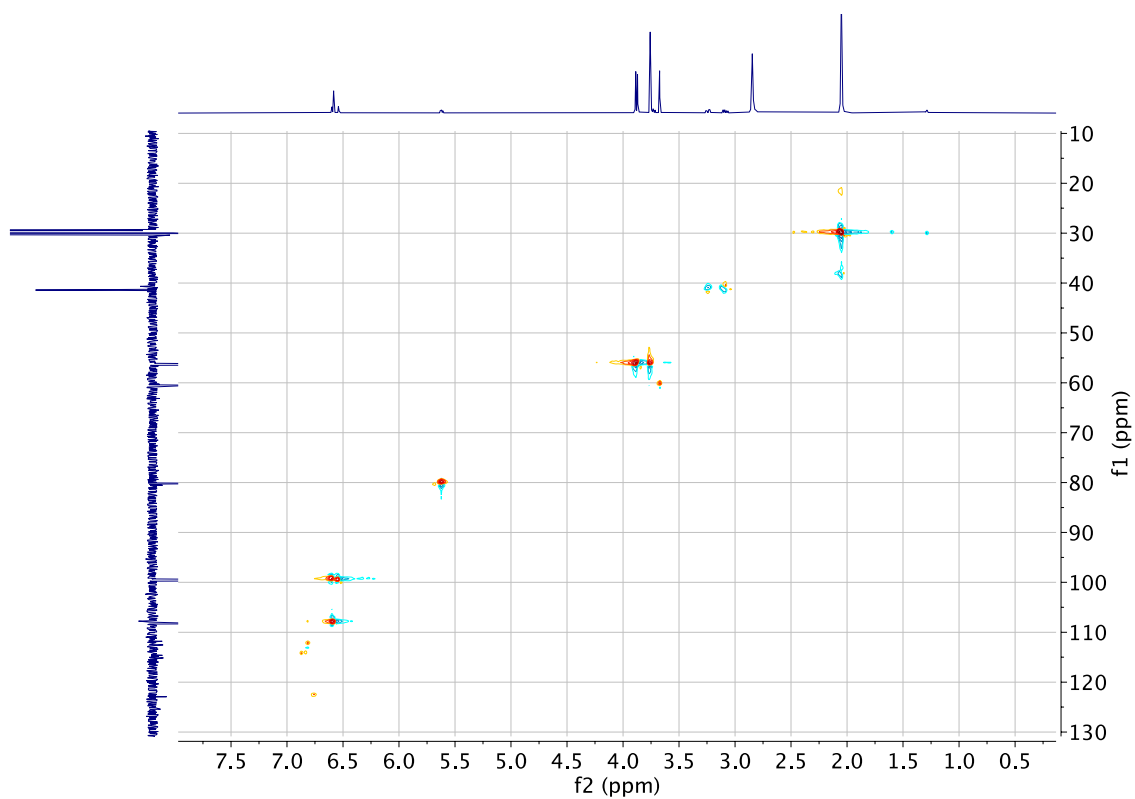

Figure S-9D. The HSQC spectrum of **7** in acetone- $d_6$ .

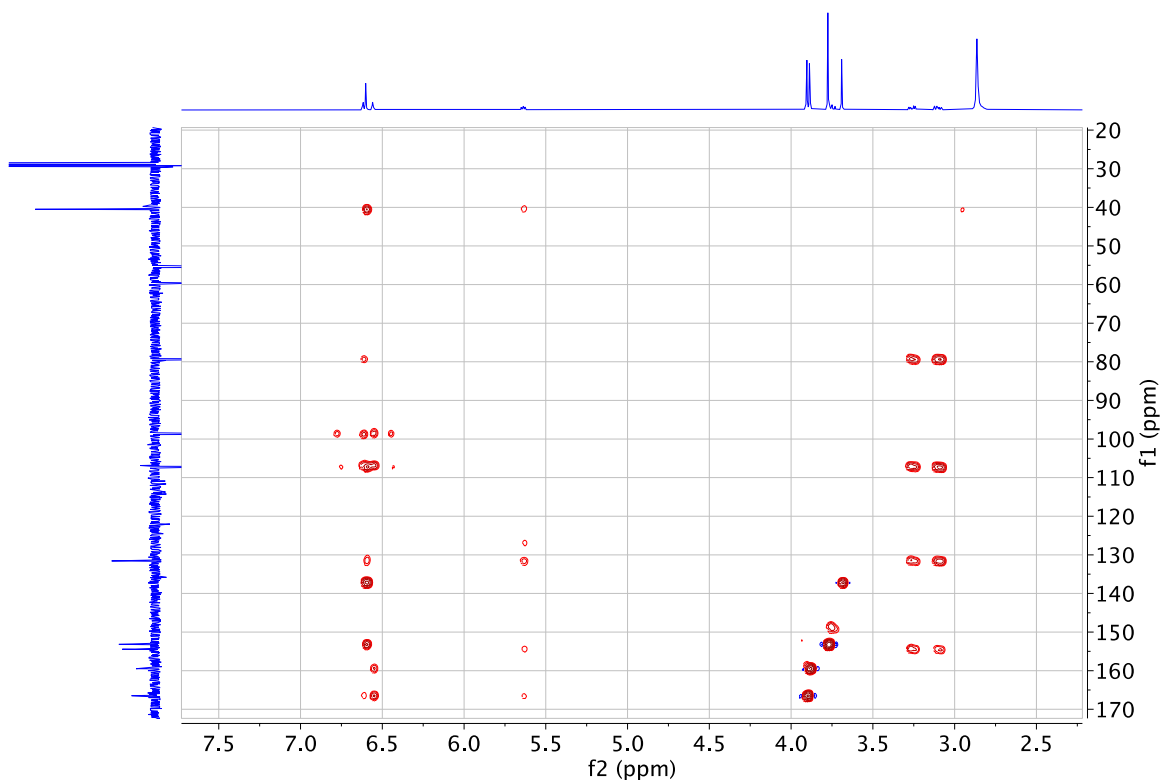

Figure S-9E. The HMBC spectrum of **7** in acetone- $d_6$ .

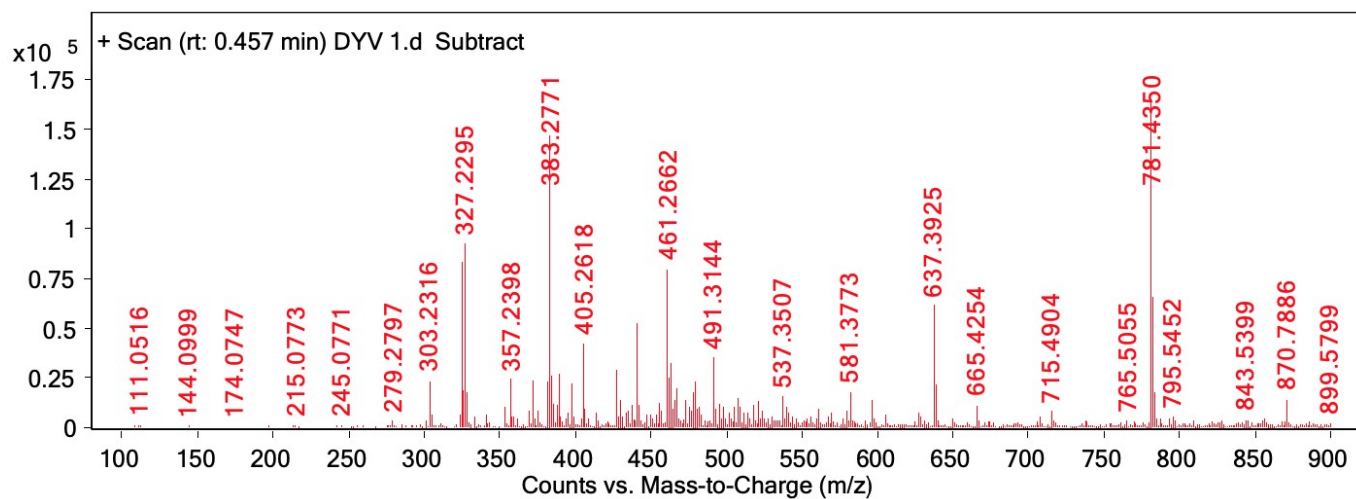

Figure S-10A. The HRESIMS spectrum of **8**.

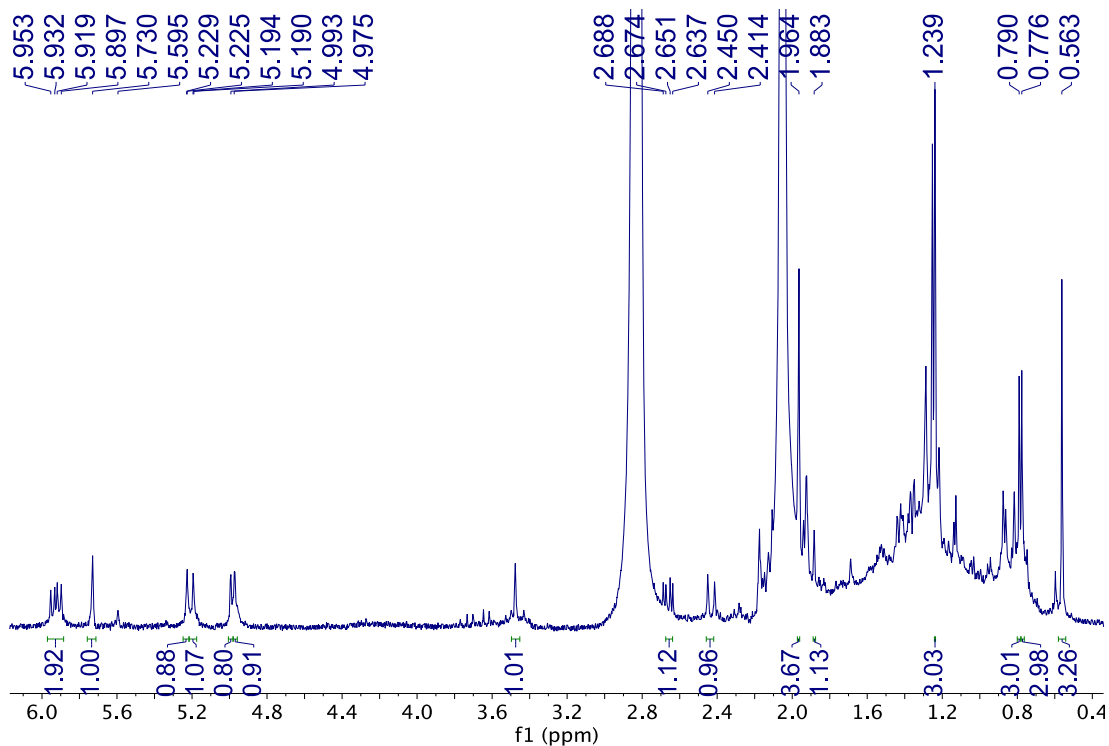

Figure S-10B. The  $^1\text{H}$  NMR spectrum of **8** in acetone- $d_6$ .

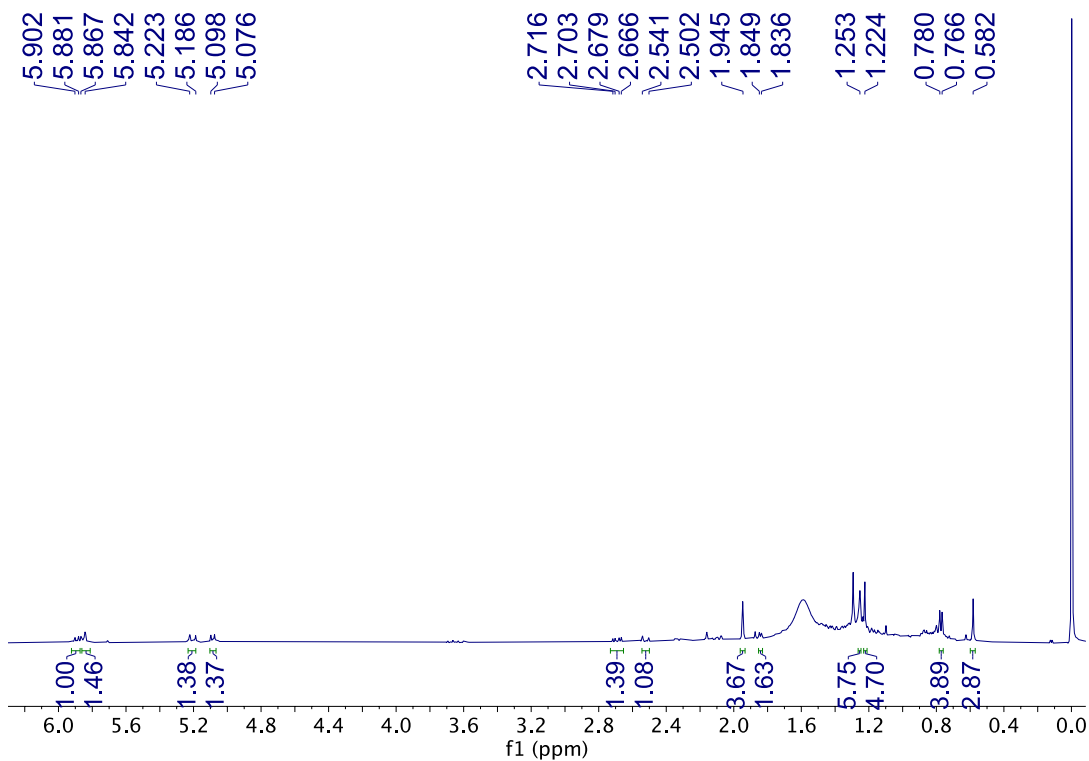

Figure S-10C. The  $^1\text{H}$  NMR spectrum of **8** in  $\text{CDCl}_3$ .

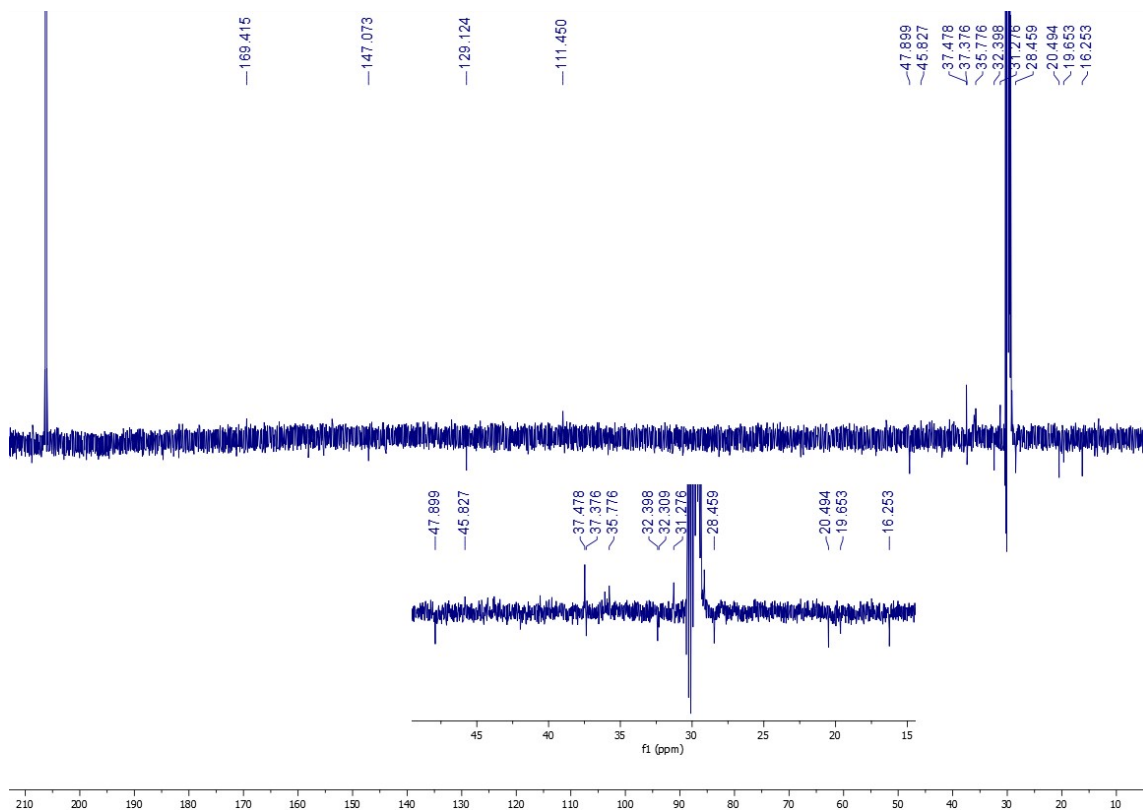

Figure S-10D. The  $^{13}\text{C}$  NMR spectrum of **8** in acetone- $d_6$

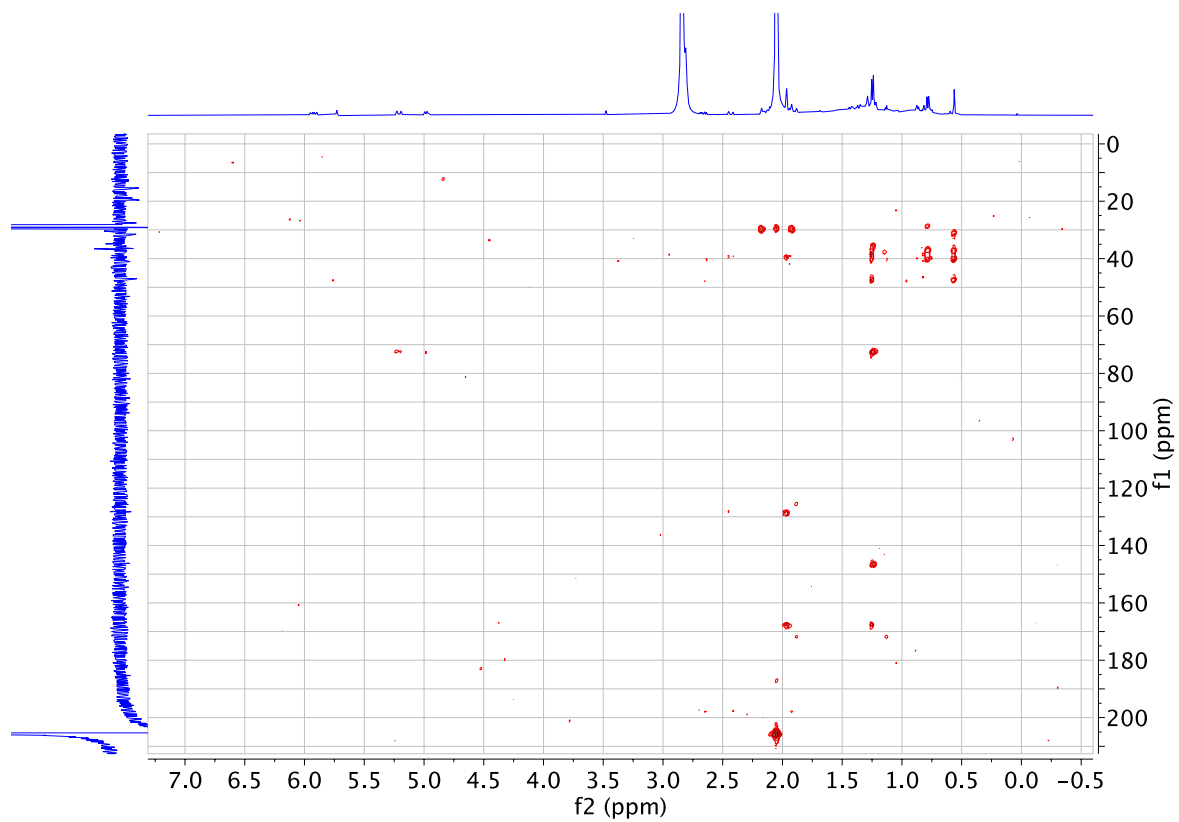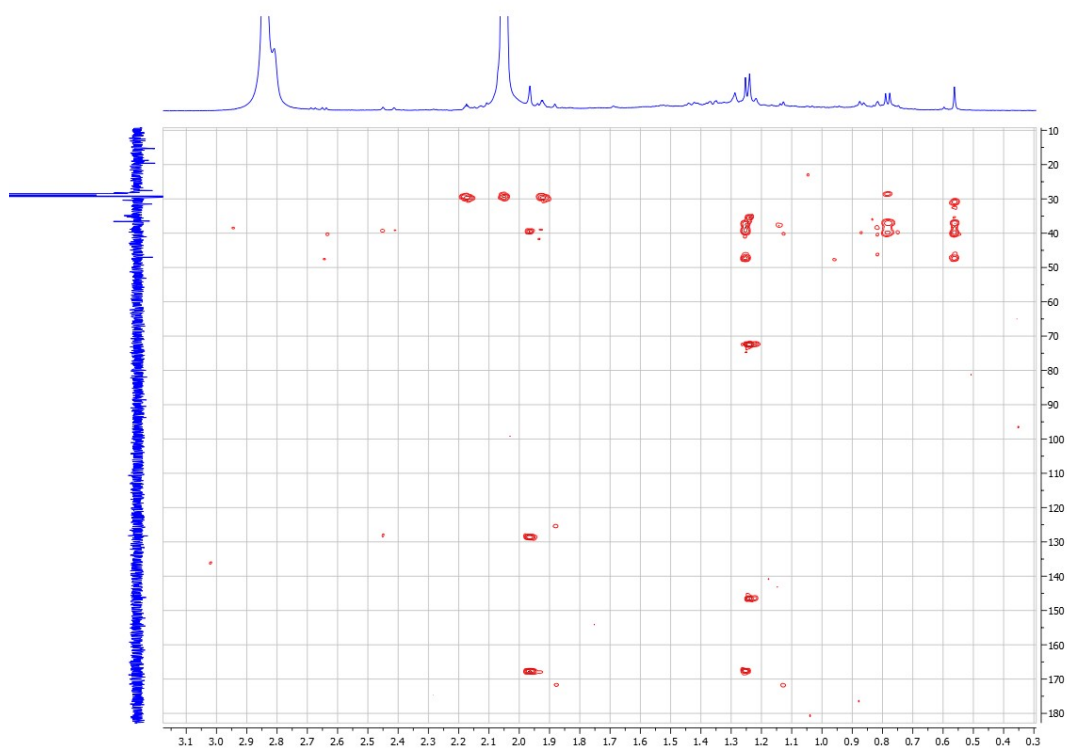

Figure S-10E. The HMBC spectrum of **8** in acetone- $d_6$ .

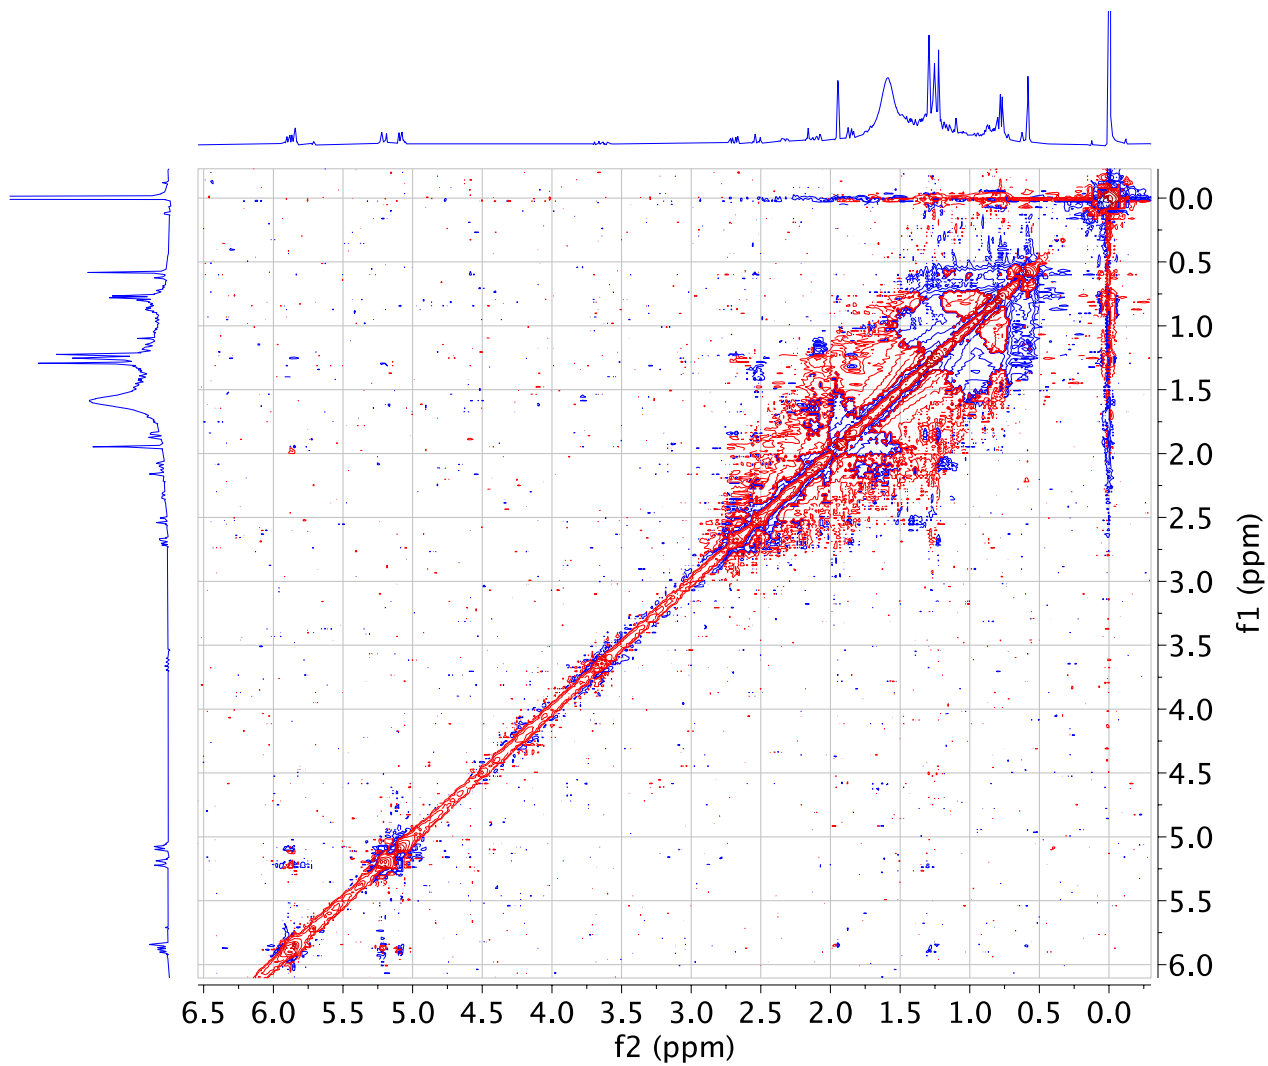

**Figure S-10F.** The NOESY spectrum of **8** in CDCl<sub>3</sub>.



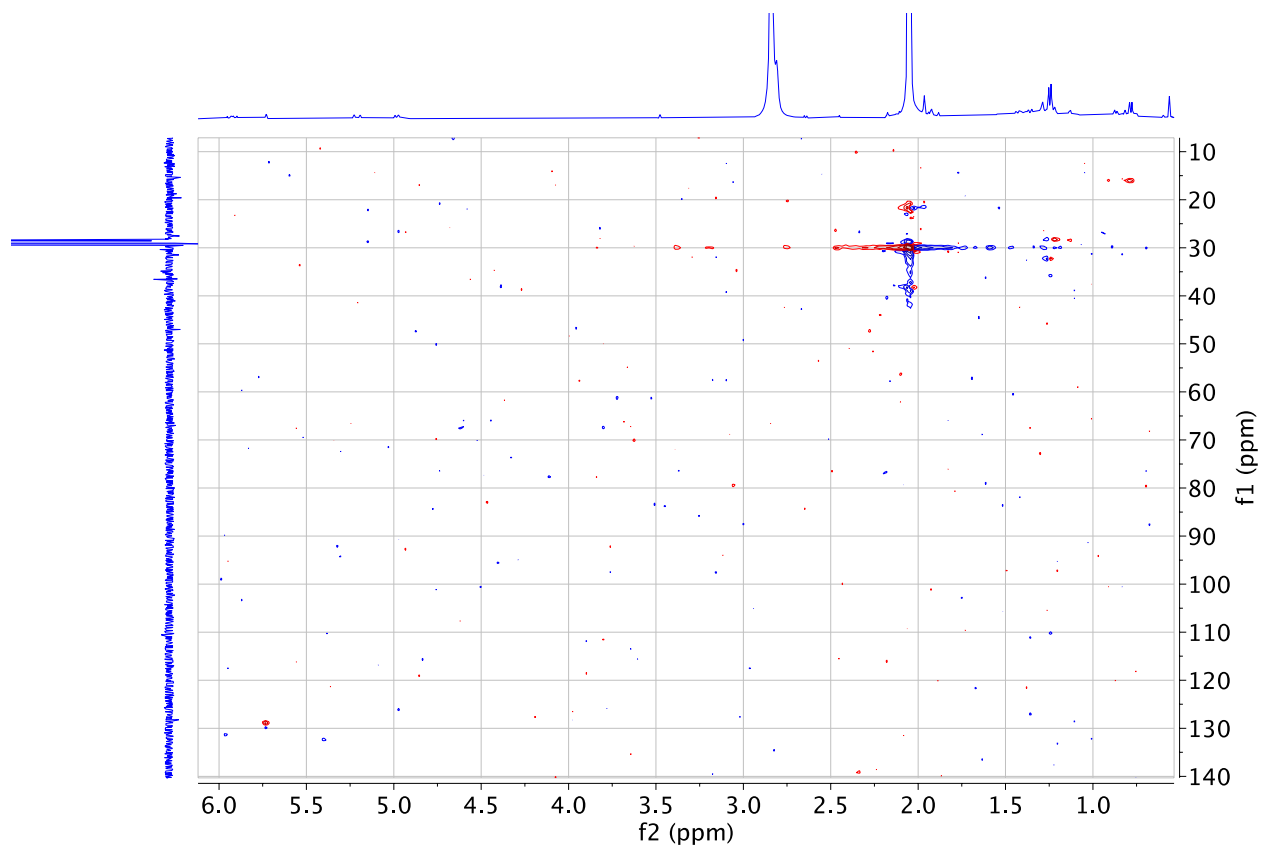

**Figure S-10G.** The HSQC spectrum of **8** in acetone- $d_6$ .

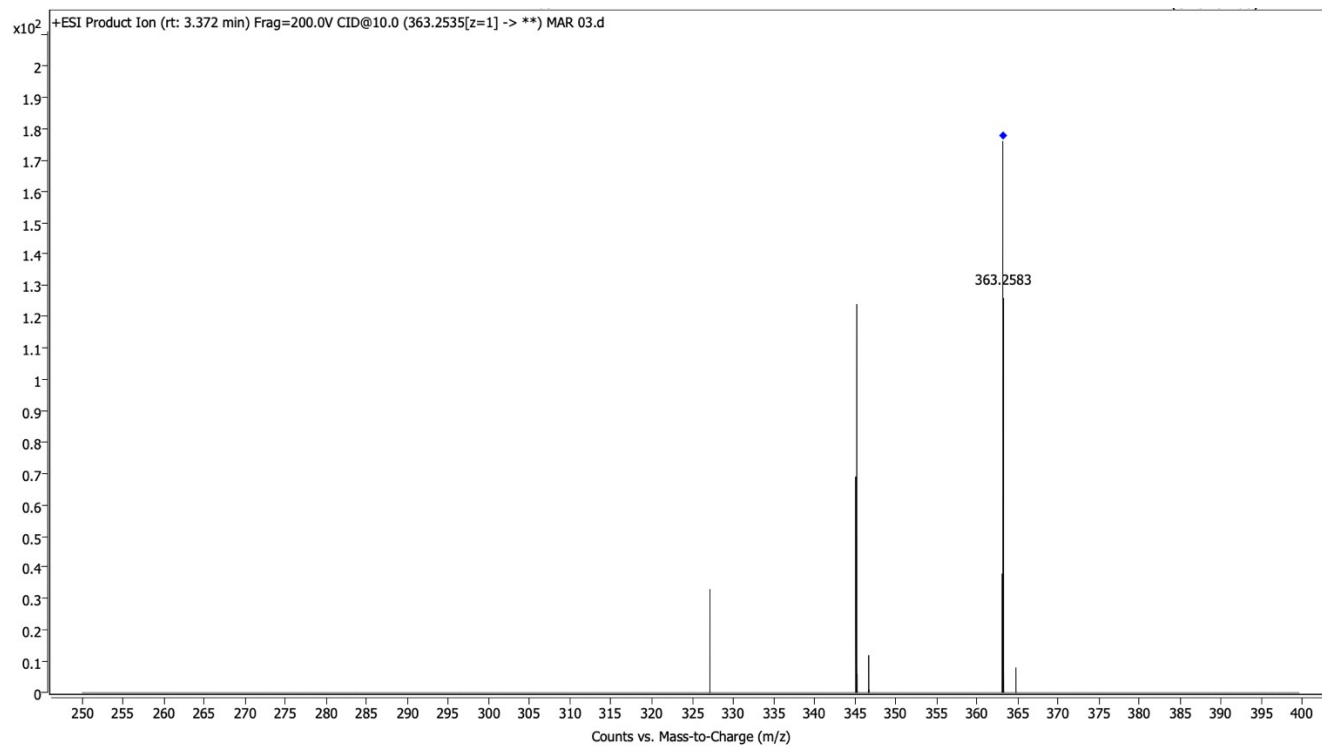

**Figure S-11A.** The HRESIMS spectrum of **9**.

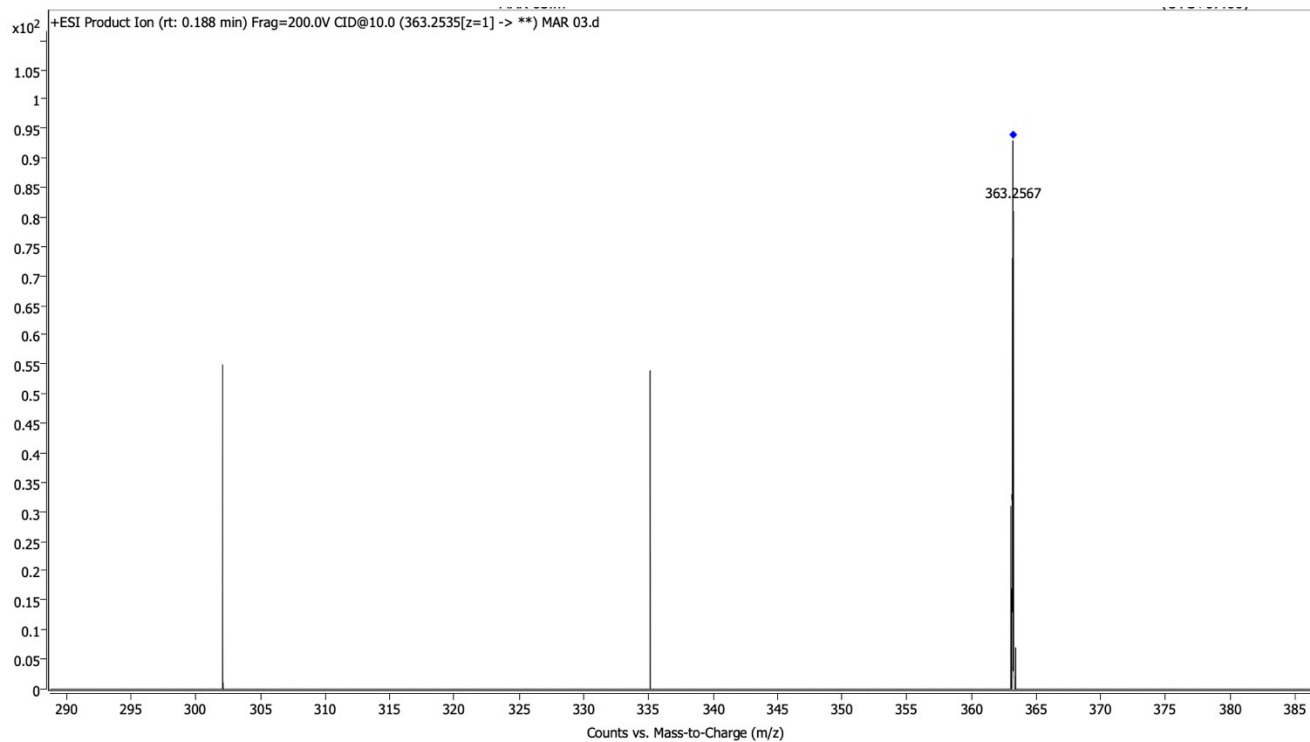

Figure S-11B. The HRESIMS spectrum of **9**.

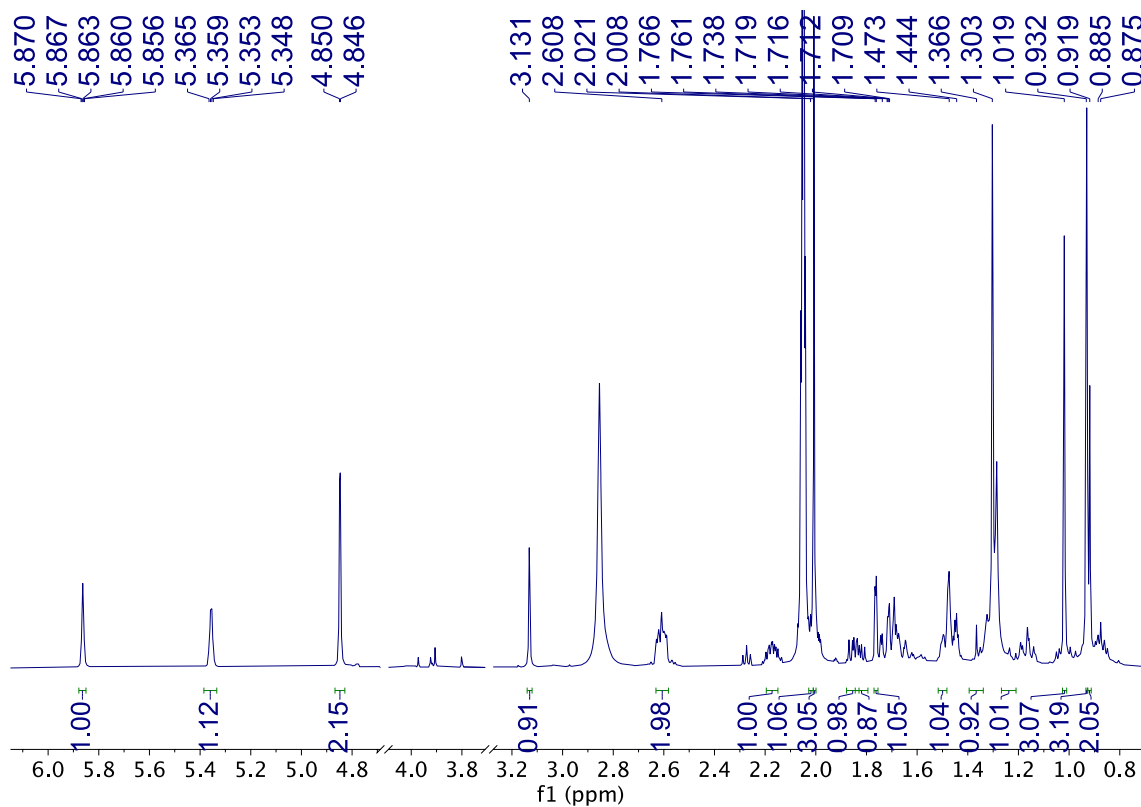

Figure S-11C. The  $^1\text{H}$  NMR spectrum of **9** in acetone- $d_6$ .

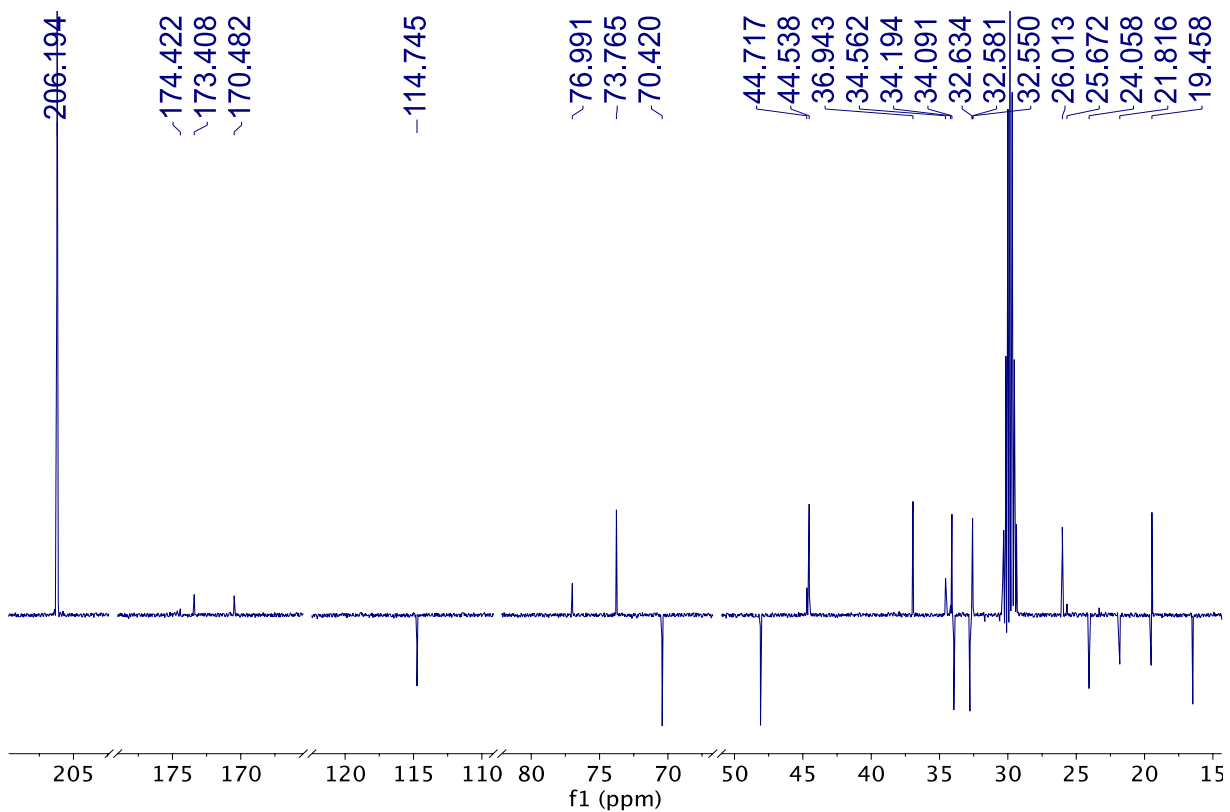

Figure S-11D. The  $^{13}\text{C}$  NMR spectrum of **9** in acetone- $d_6$ .

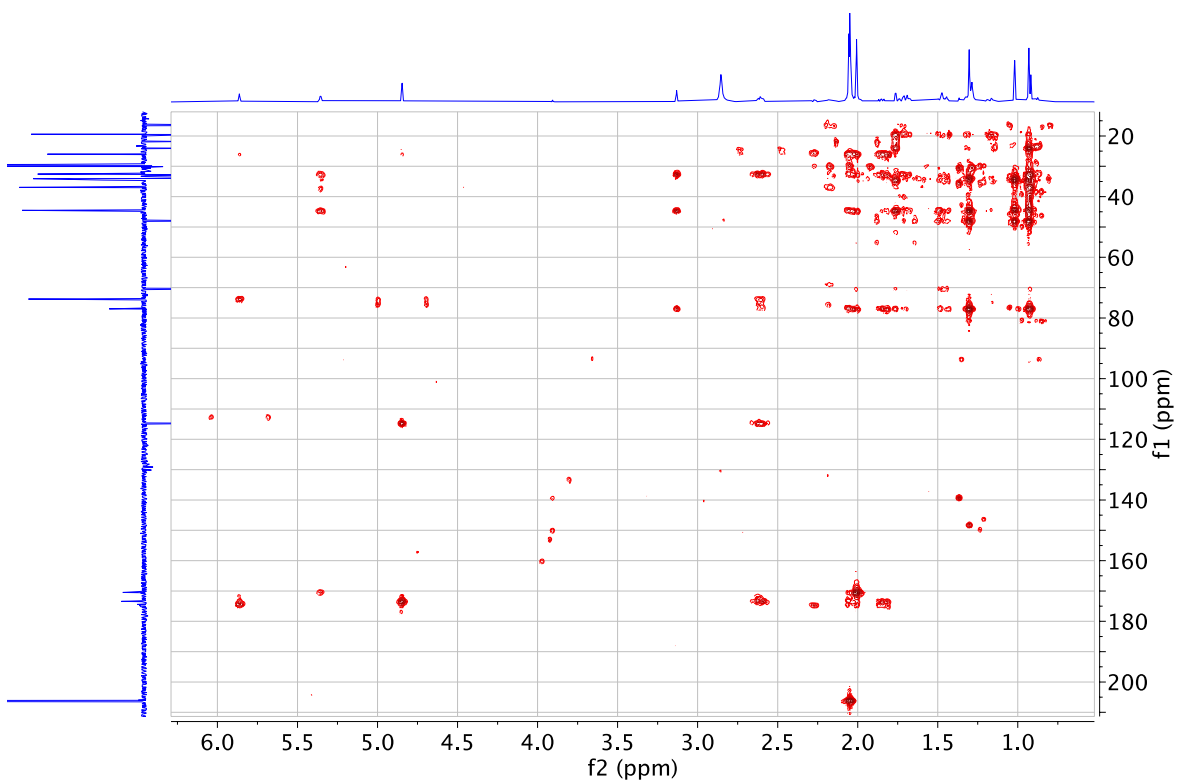

Figure S-11E. The HMBC spectrum of **9** in acetone- $d_6$ .

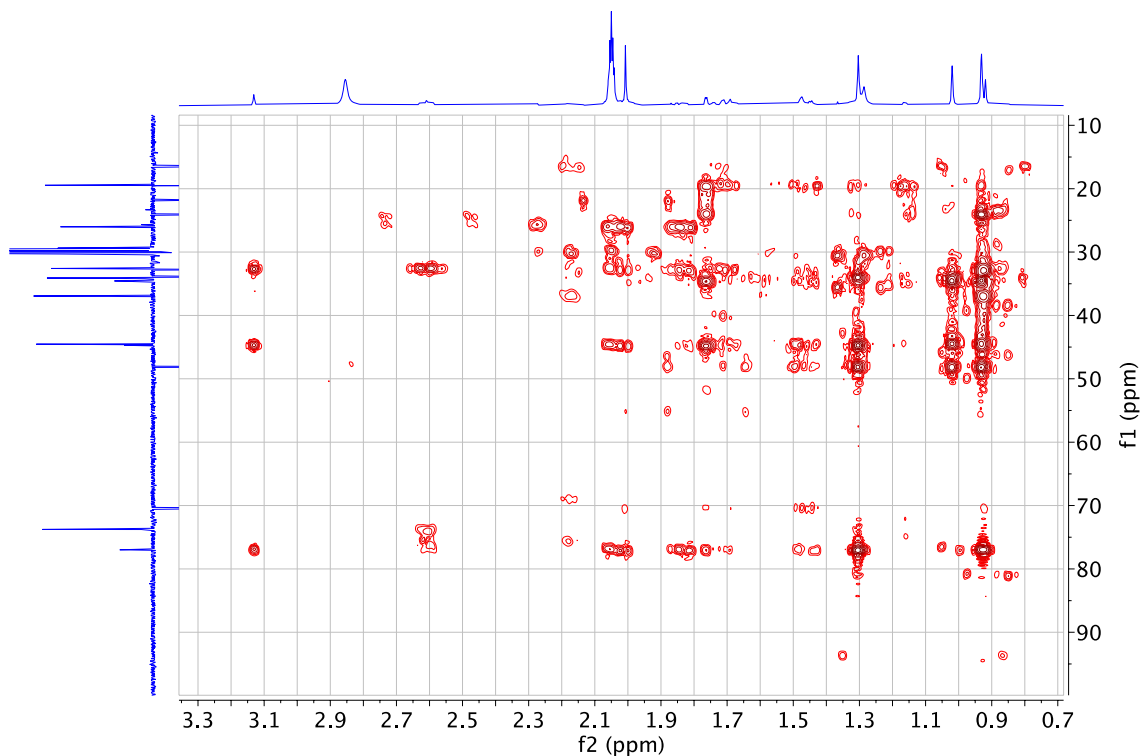

Figure S-11F. The HMBC spectrum of **9** in acetone- $d_6$ .

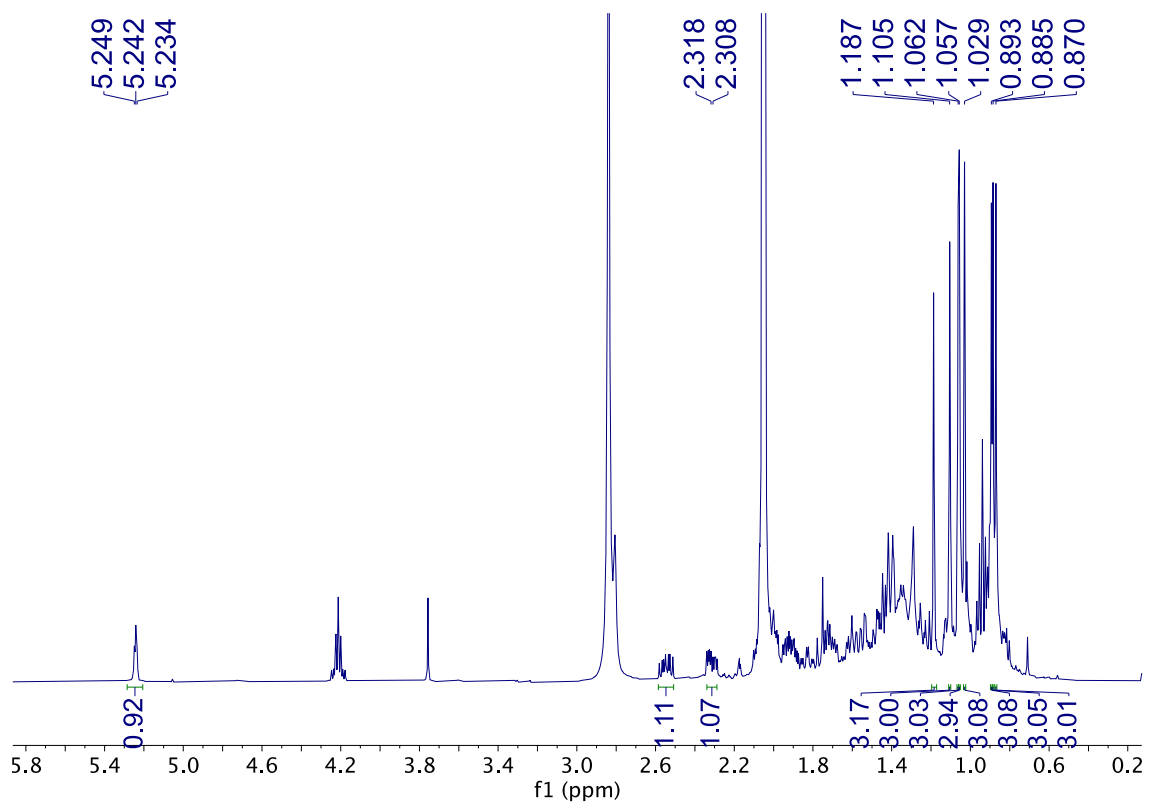

Figure S-12A. The  $^1\text{H}$  NMR spectrum of **10** in acetone- $d_6$ .

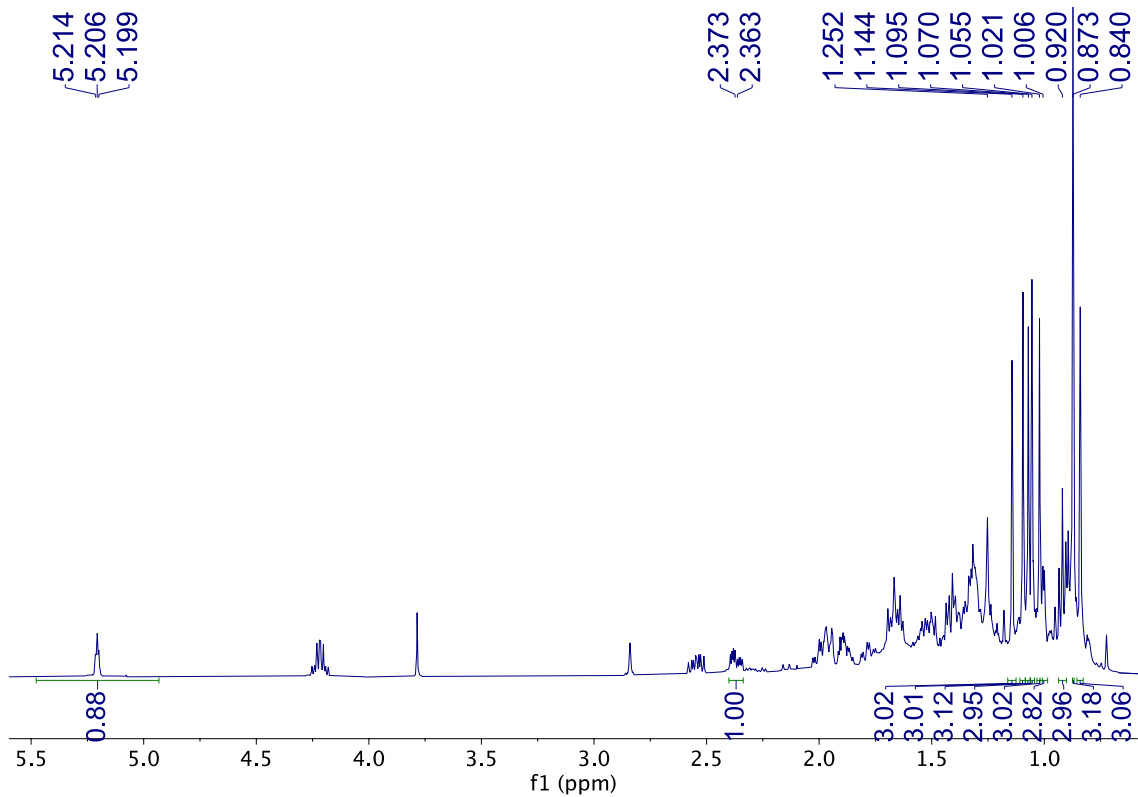

Figure S-12B. The  $^1\text{H}$  NMR spectrum of **10** in  $\text{CDCl}_3$ .

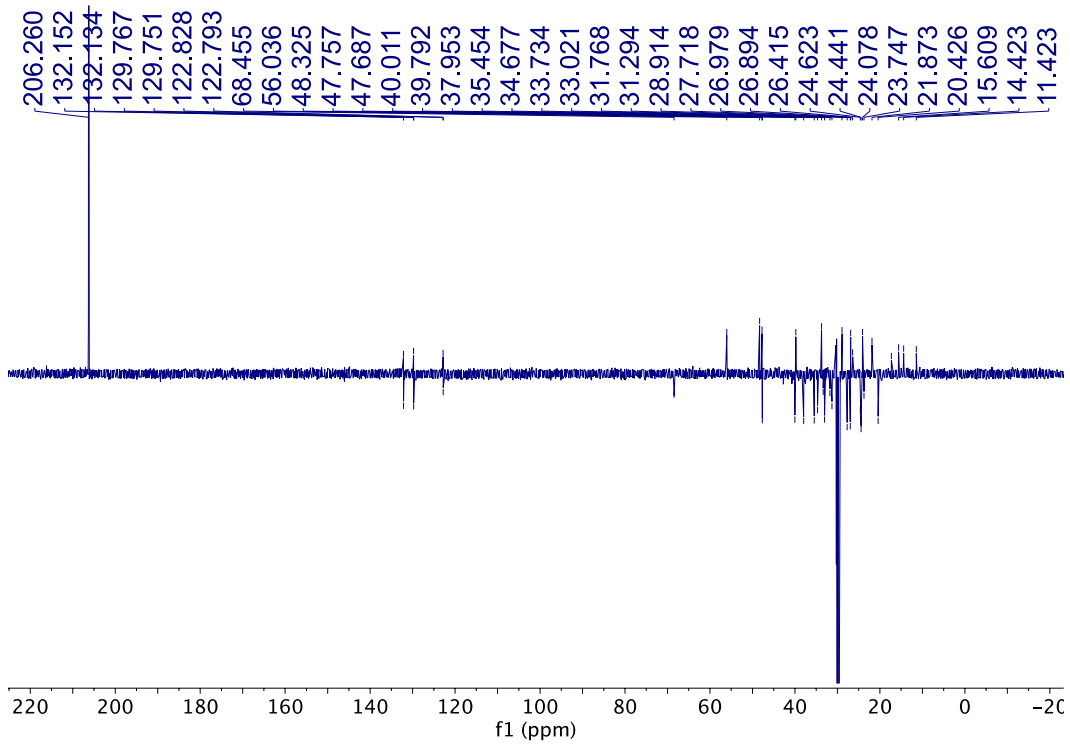

Figure S-12C. The  $^{13}\text{C}$  NMR spectrum of **10** in  $\text{acetone-}d_6$ .

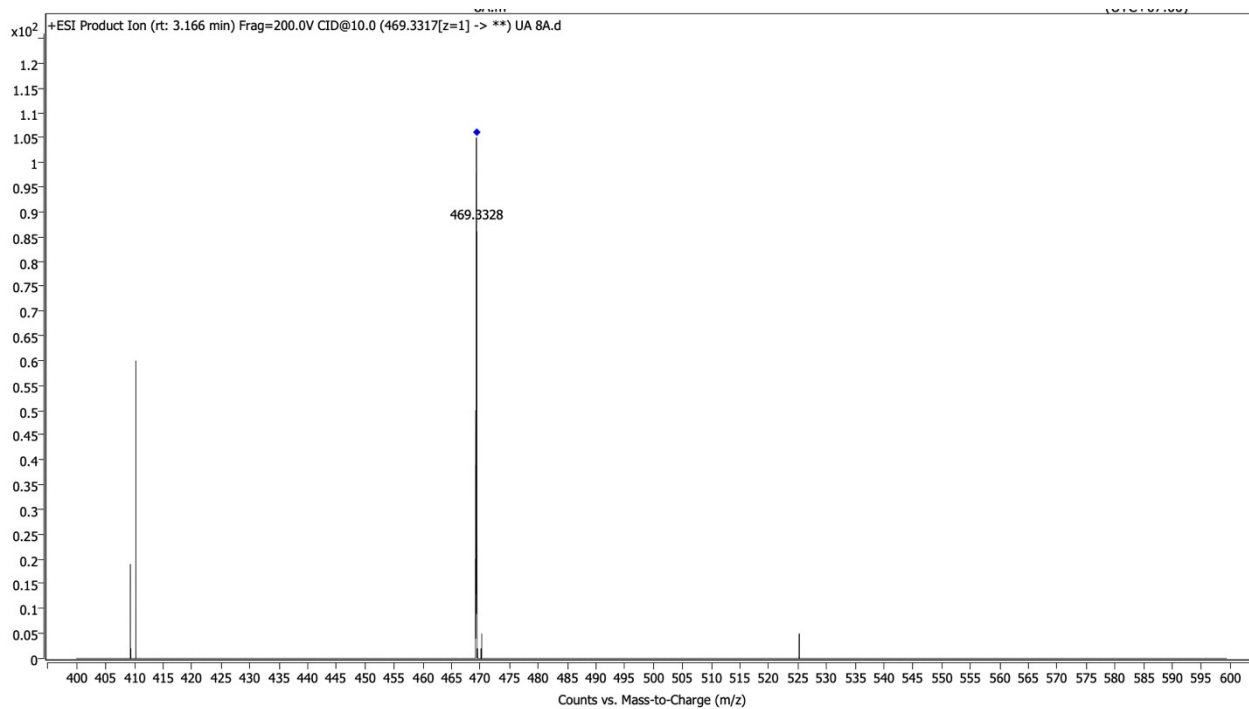

Figure S-13A. The HRESIMS spectrum of **11**.

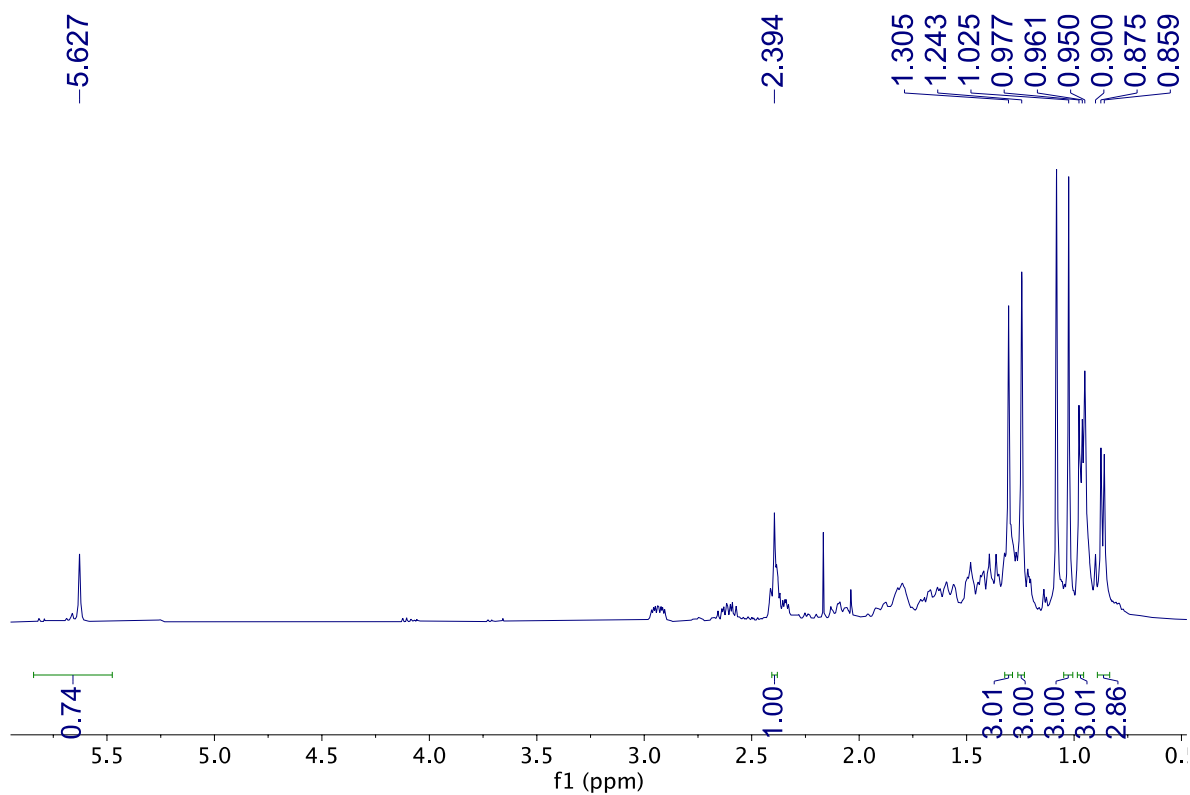

Figure S-13B. The  $^1\text{H}$  NMR spectrum of **11** in  $\text{CDCl}_3$ .

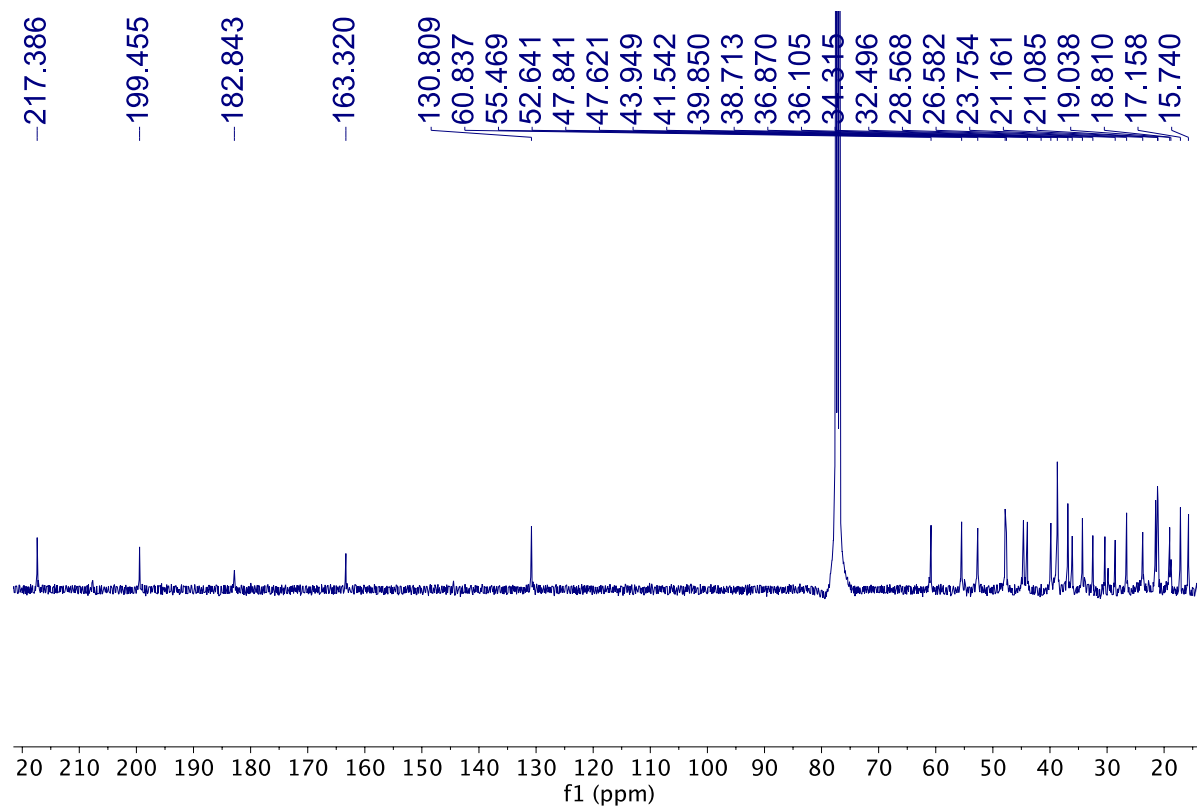

Figure S-13C. The  $^{13}\text{C}$  NMR spectrum of **11** in  $\text{CDCl}_3$ .

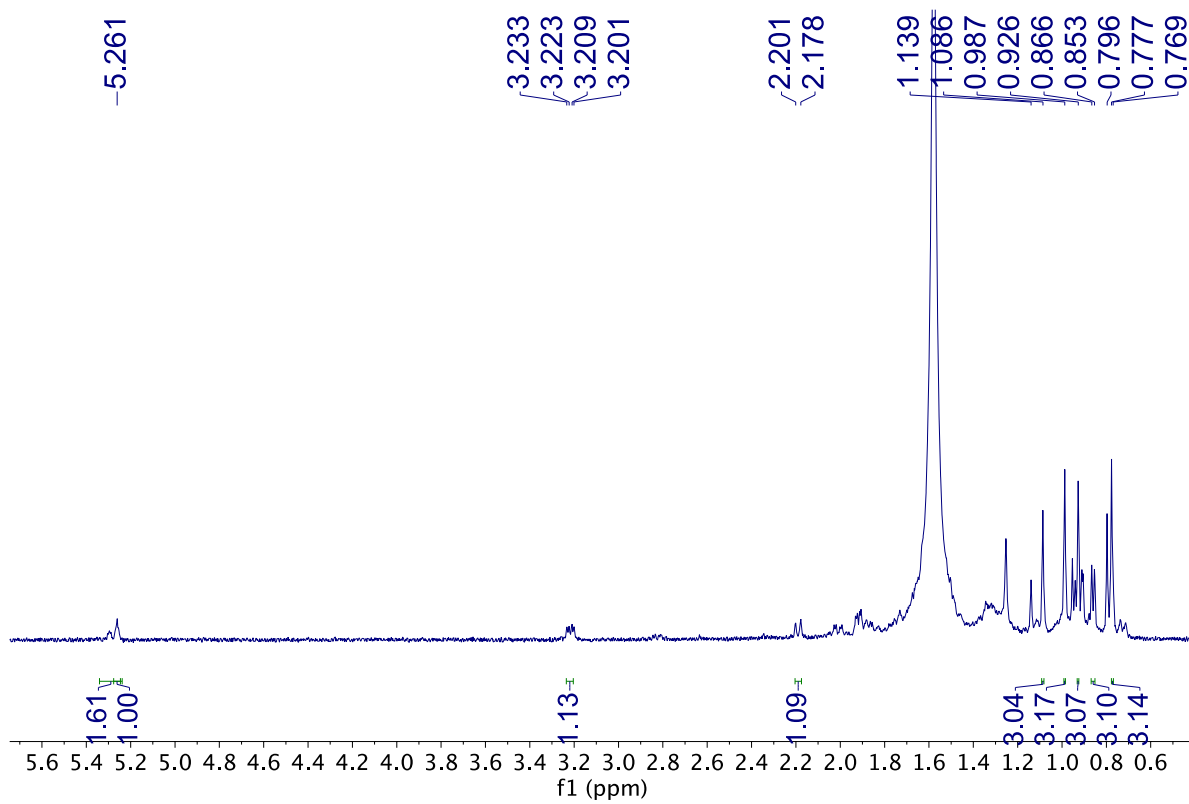

Figure S-14A. The  $^1\text{H}$  NMR spectrum of **12** in  $\text{CDCl}_3$ .

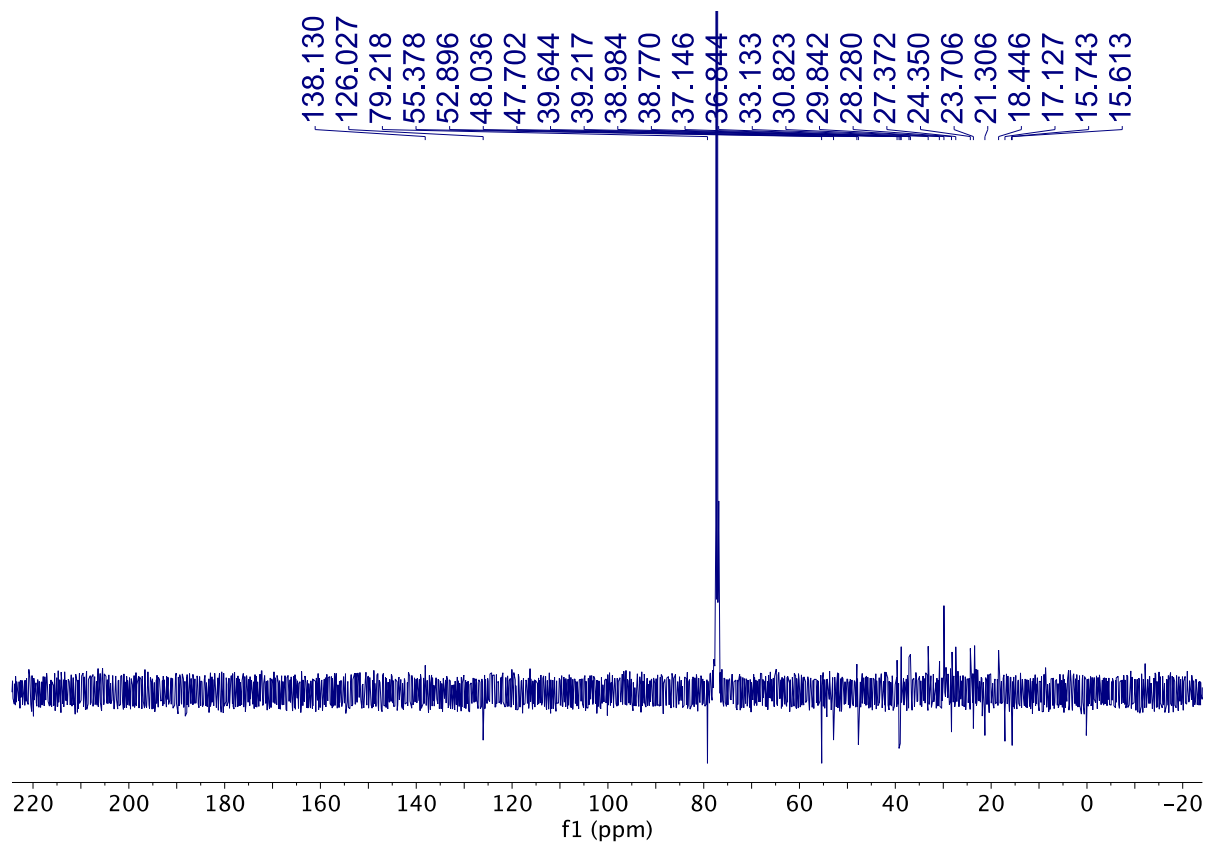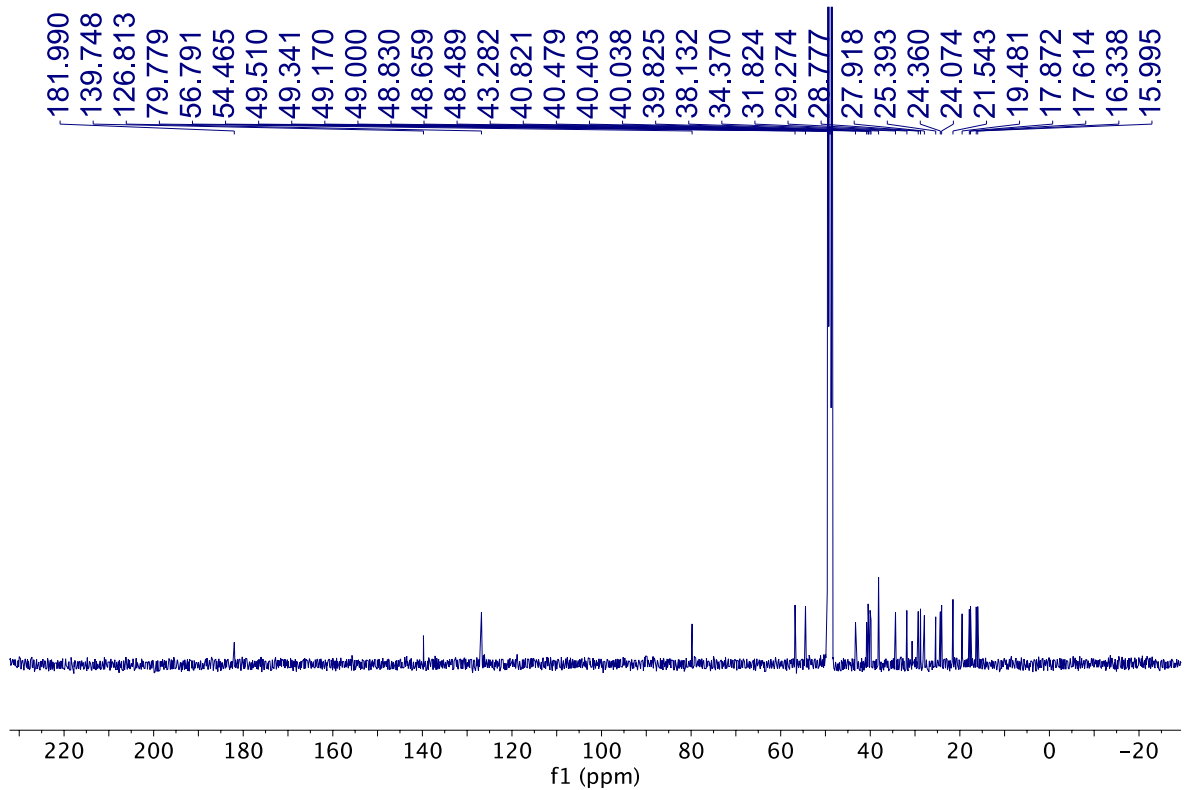

**Figure S-14B.** The  $^{13}\text{C}$  NMR spectrum of **12** in  $\text{CDCl}_3$ .



Figure S-14C. The  $^{13}\text{C}$  NMR spectrum of **12** in MeOD.

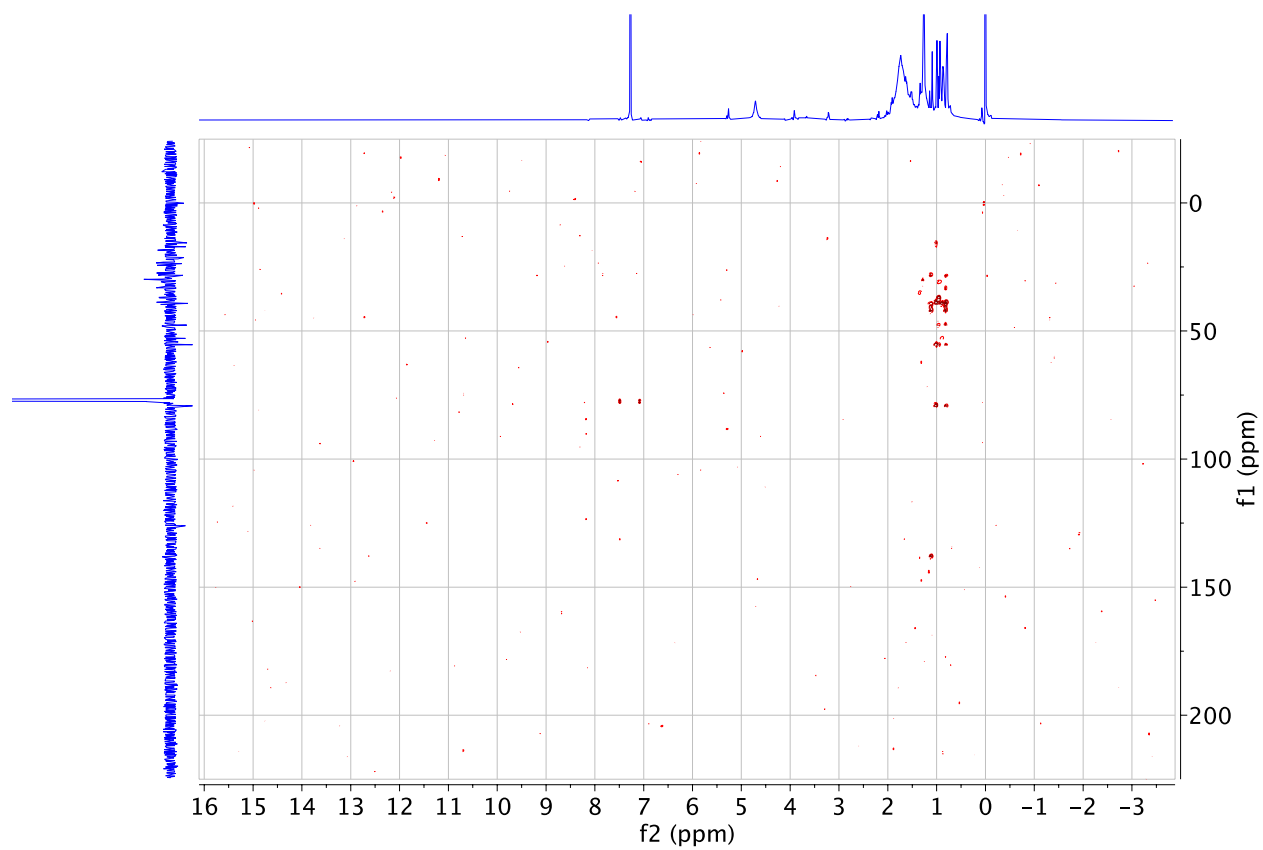

Figure S-14D. The HMBC spectrum of **12** in  $\text{CDCl}_3$ .

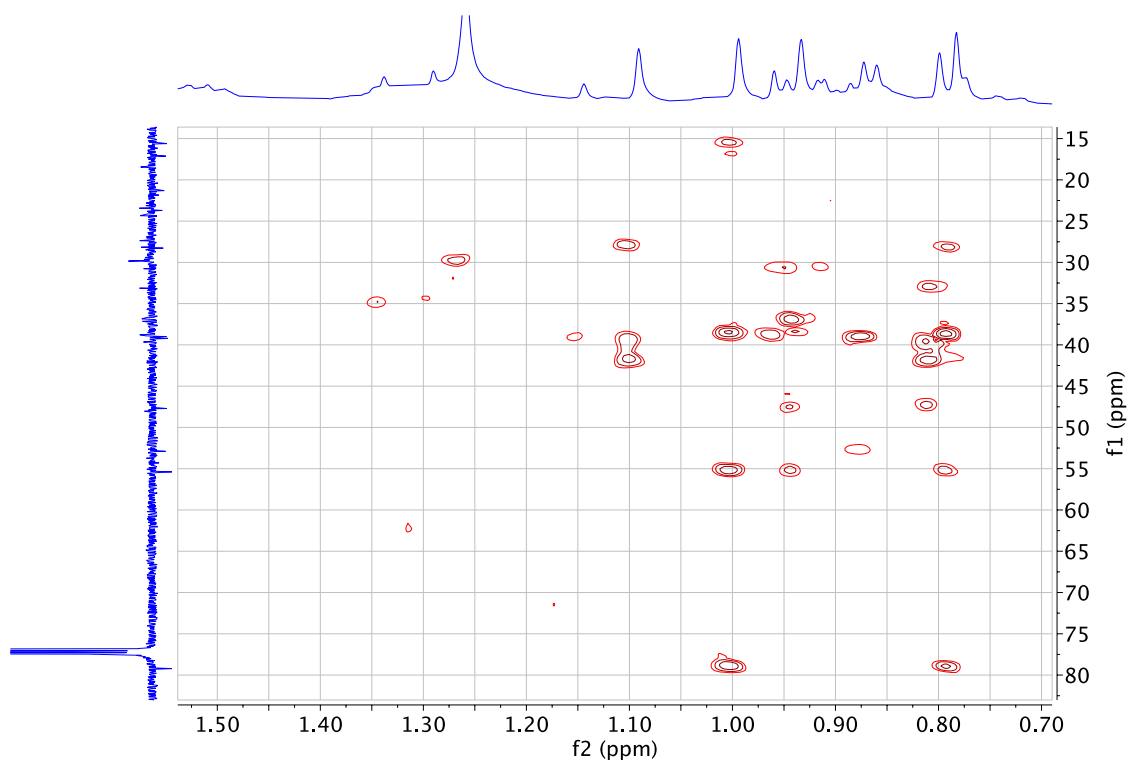

Figure S-14E. The HMBC spectrum of **12** in CDCl<sub>3</sub>.

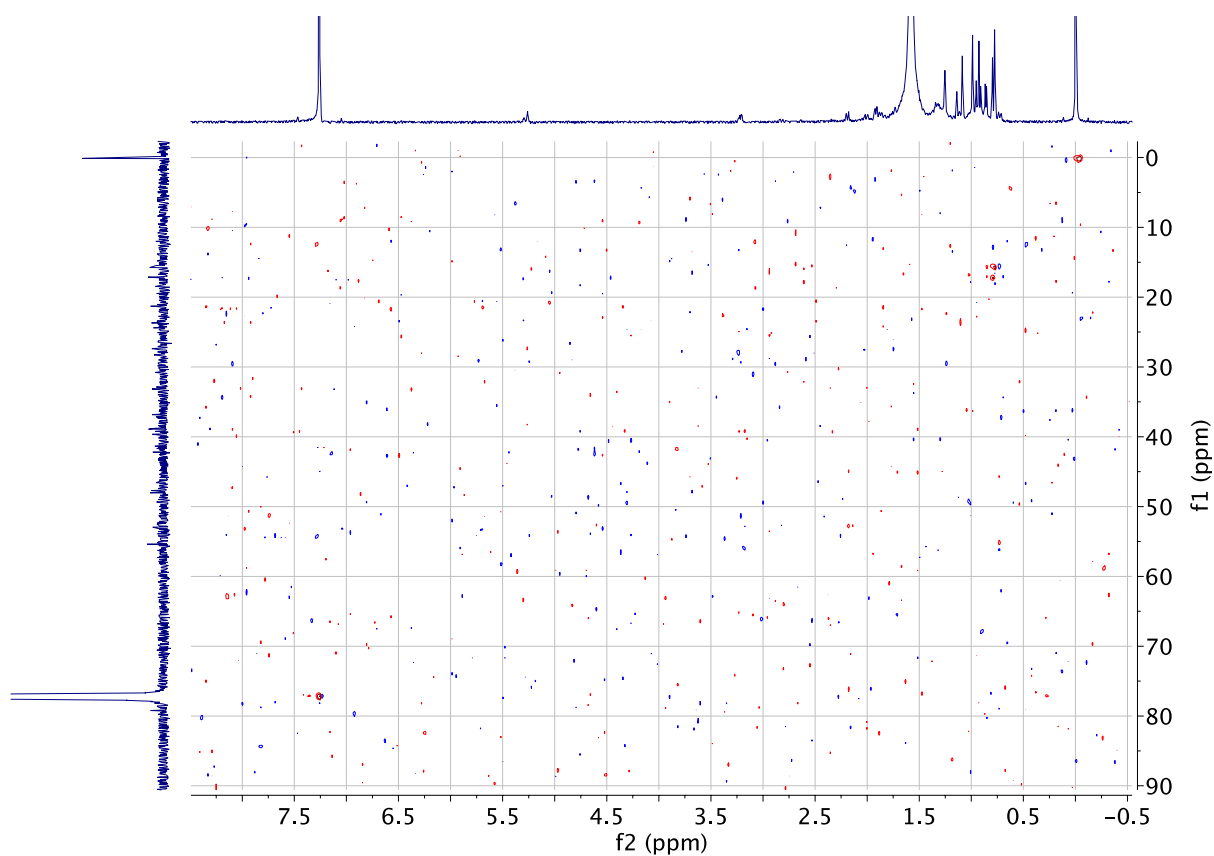

Figure S-14F. The HSQC spectrum of **12** in CDCl<sub>3</sub>.

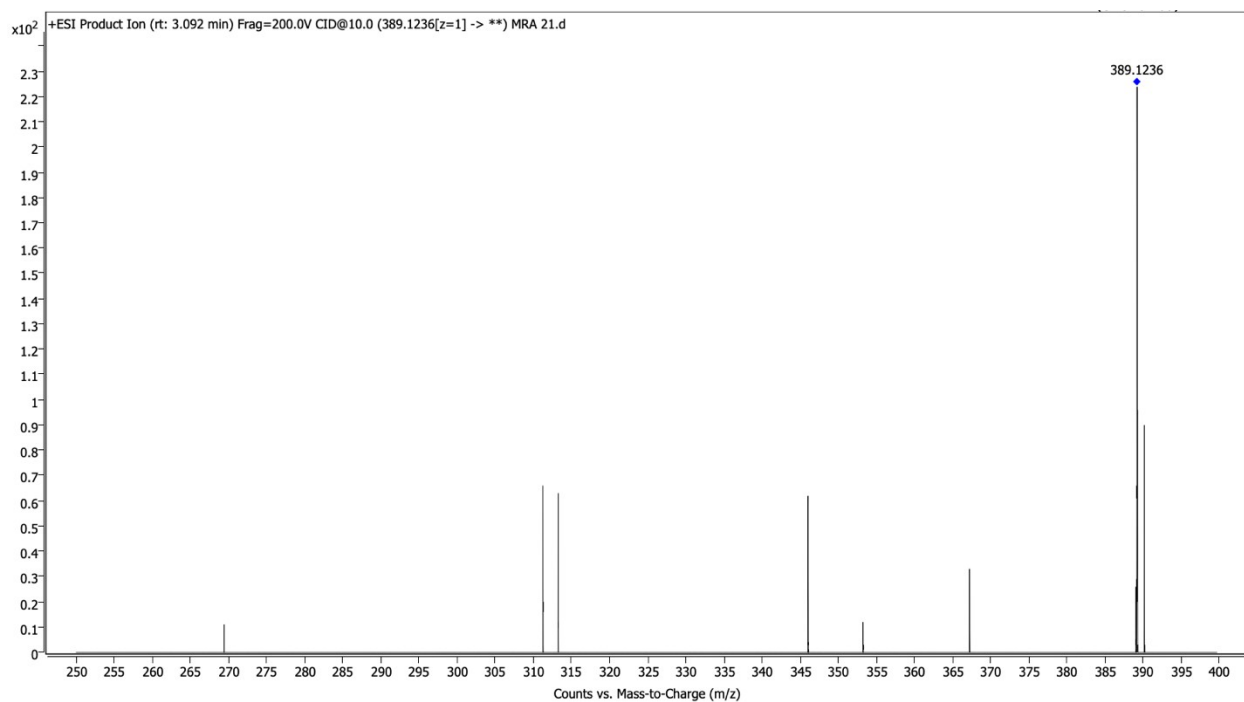

**Figure S-15A.** The HRESIMS spectrum of **13**.

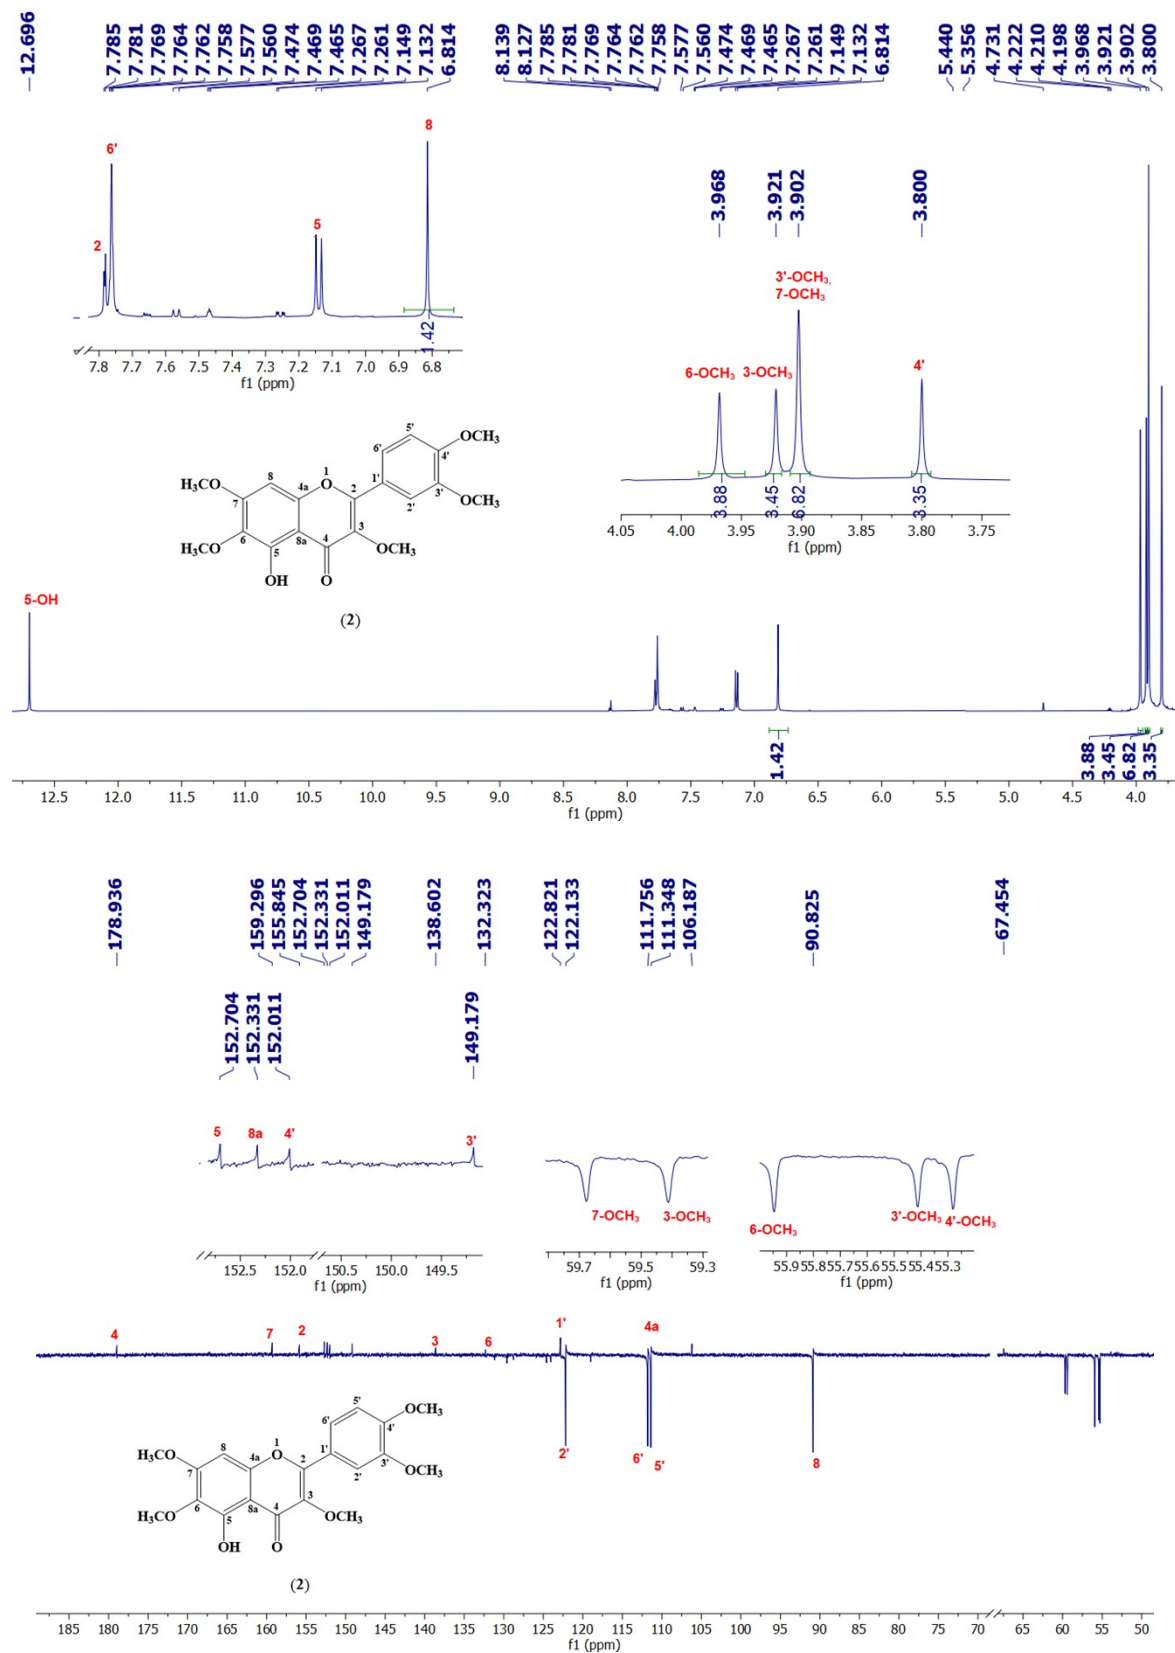

Figure S-15B. The <sup>1</sup>H NMR spectrum of **13** in acetone-*d*<sub>6</sub>.

Figure S-15C. The  $^{13}\text{C}$  NMR spectrum of **13** in acetone- $d_6$ .

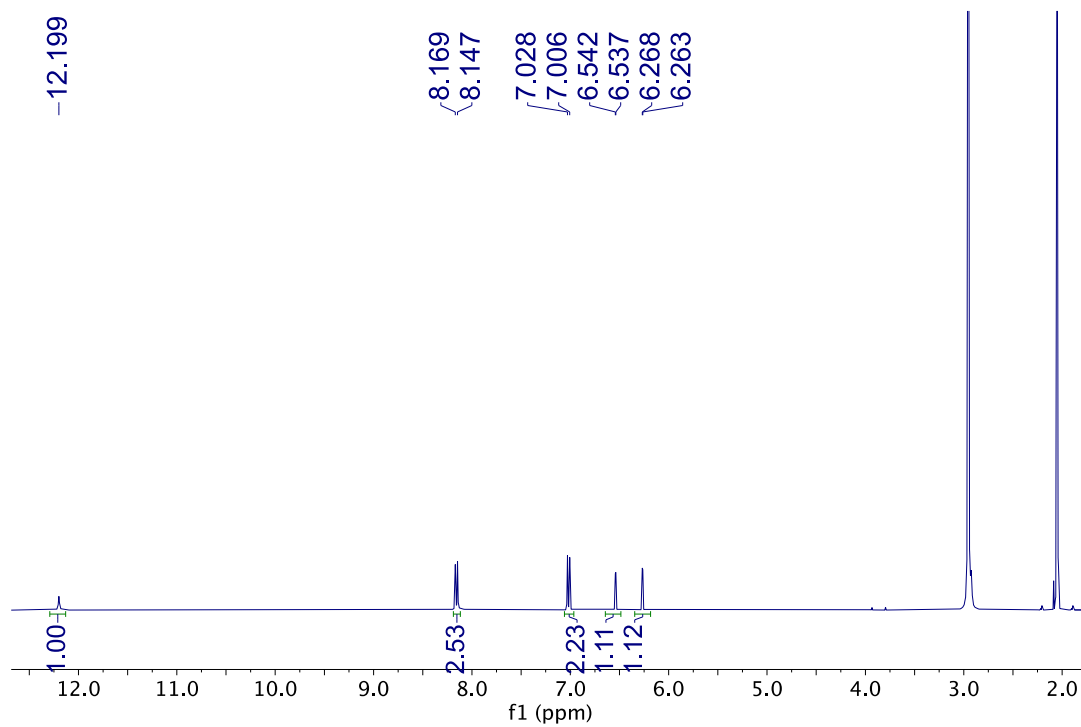

Figure S-16A. The  $^1\text{H}$  NMR spectrum of **14** in acetone- $d_6$ .

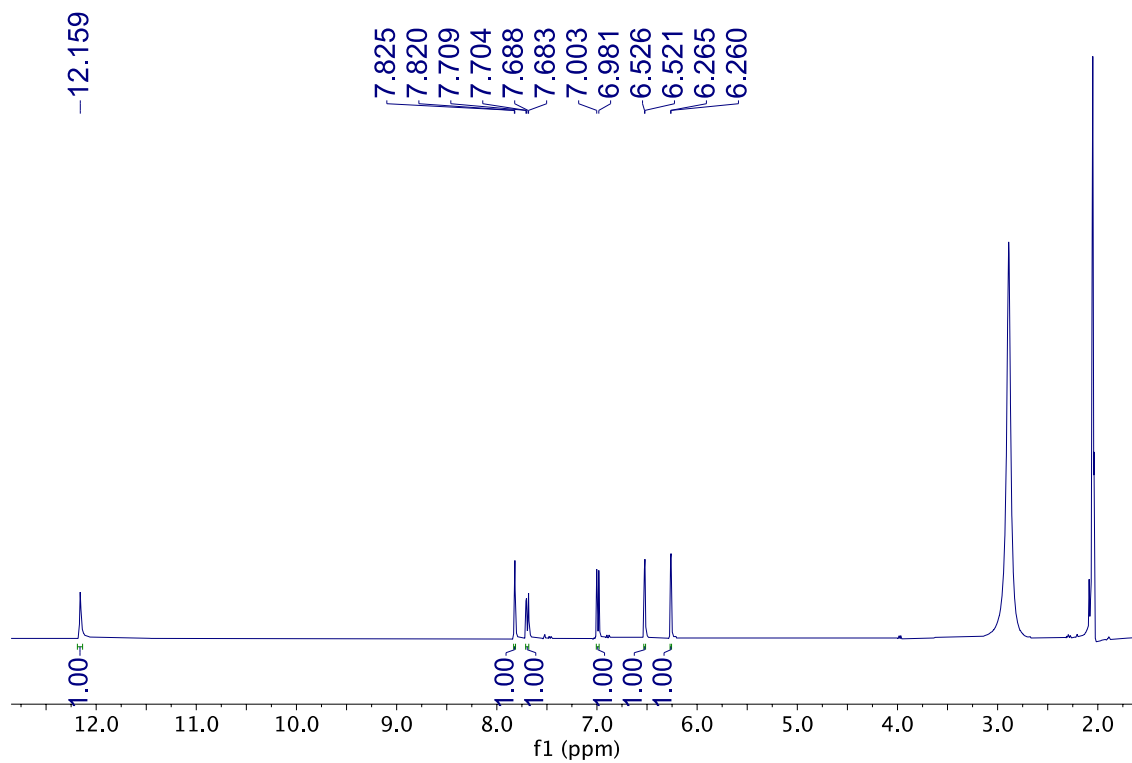

Figure S-17A. The  $^1\text{H}$  NMR spectrum of **15** in acetone- $d_6$ .

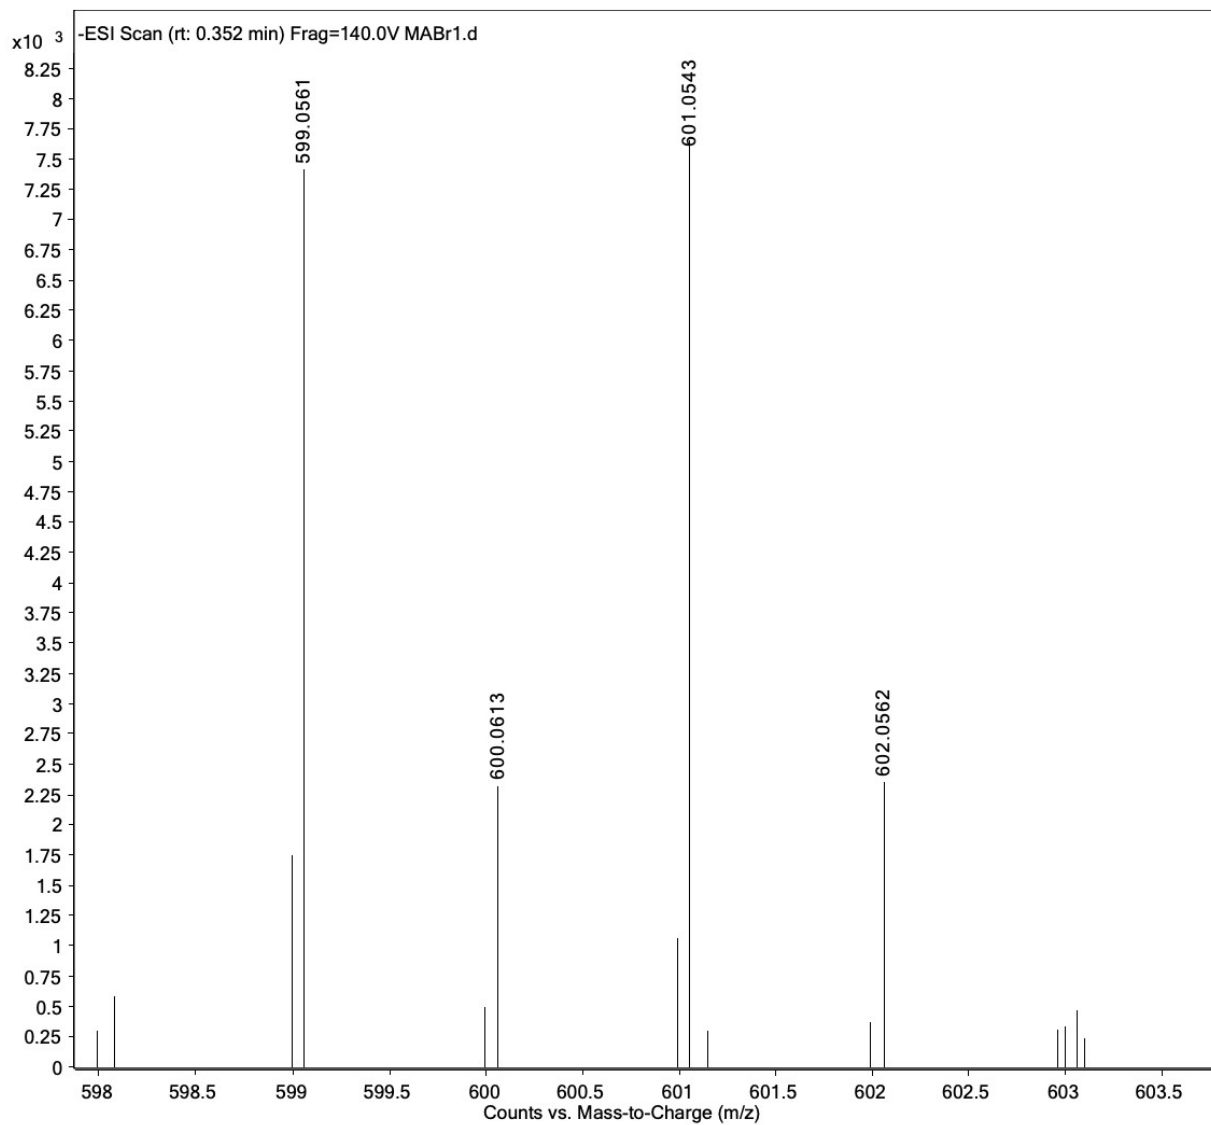

Figure S-18A. The HRESIMS spectrum of **1a**.



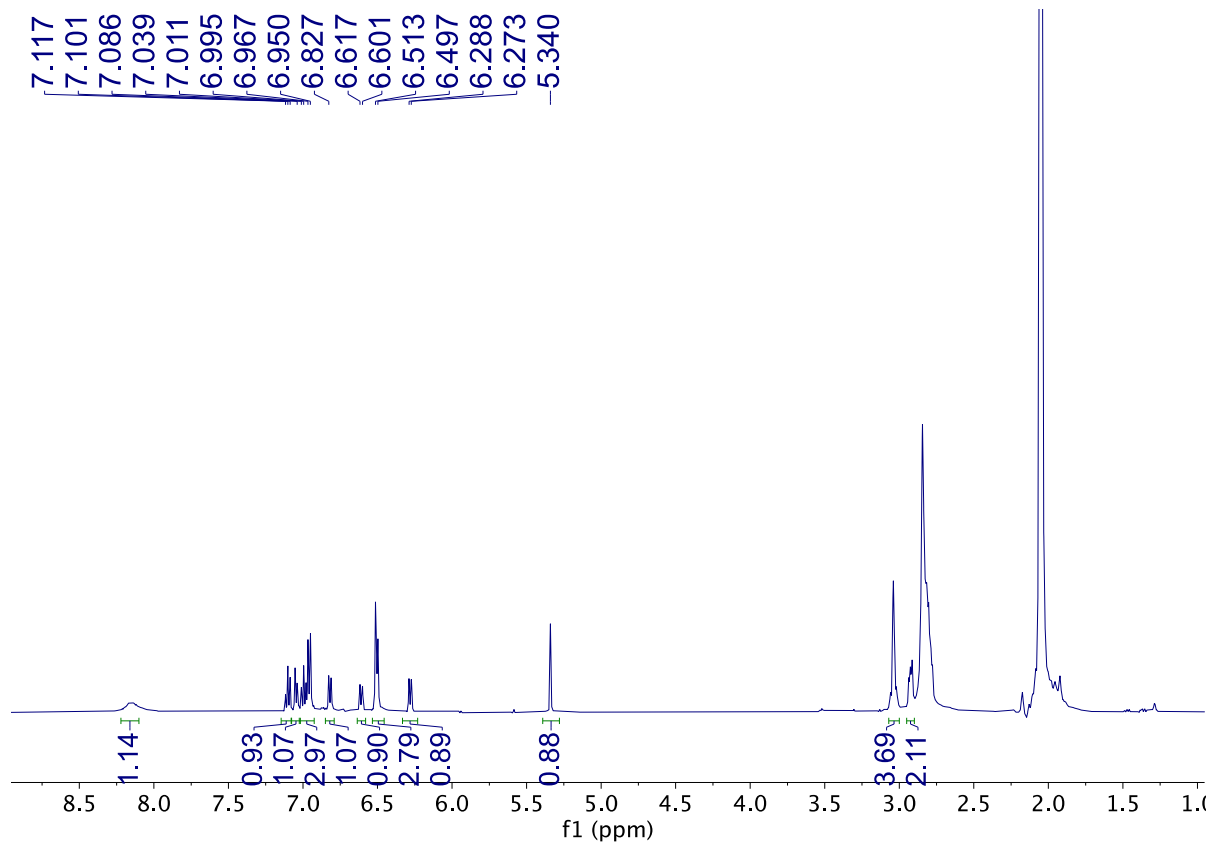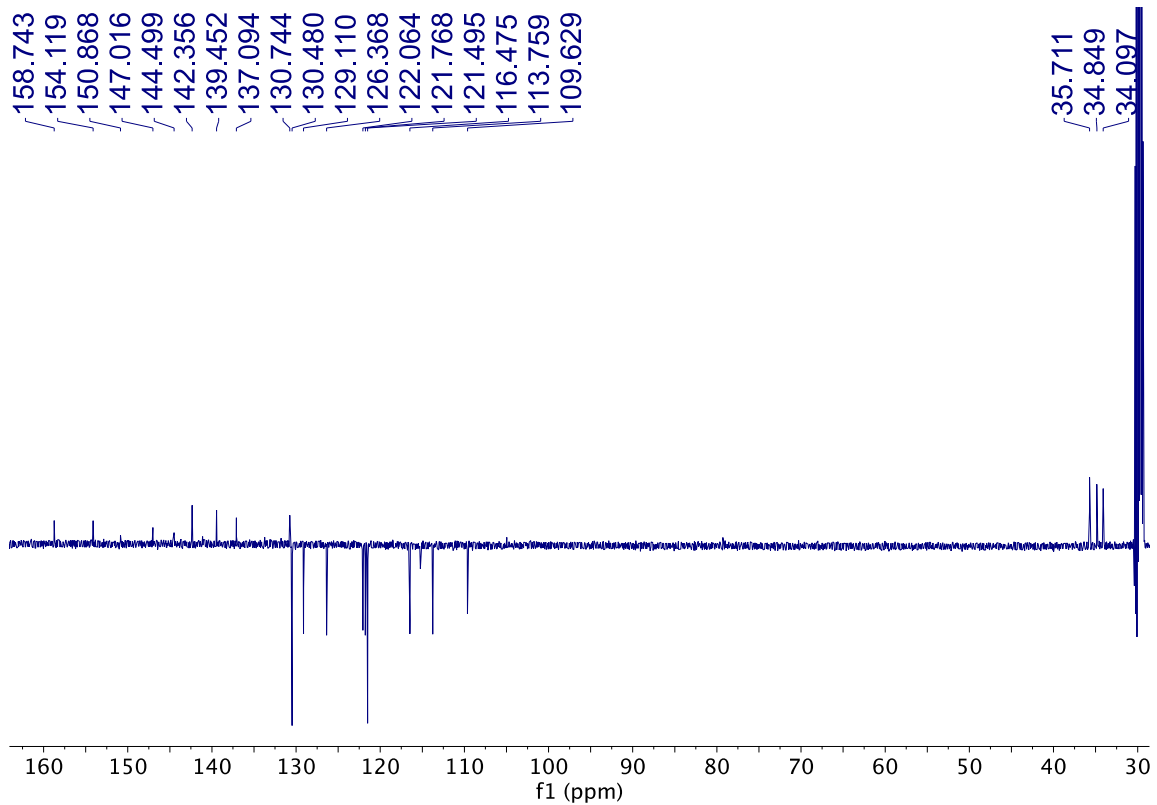

Figure S-18B. The  $^1\text{H}$  NMR spectrum of **1a** in acetone- $d_6$ .



**Figure S-18C.** The  $^{13}\text{C}$  NMR spectrum of **1a** in acetone- $d_6$ .

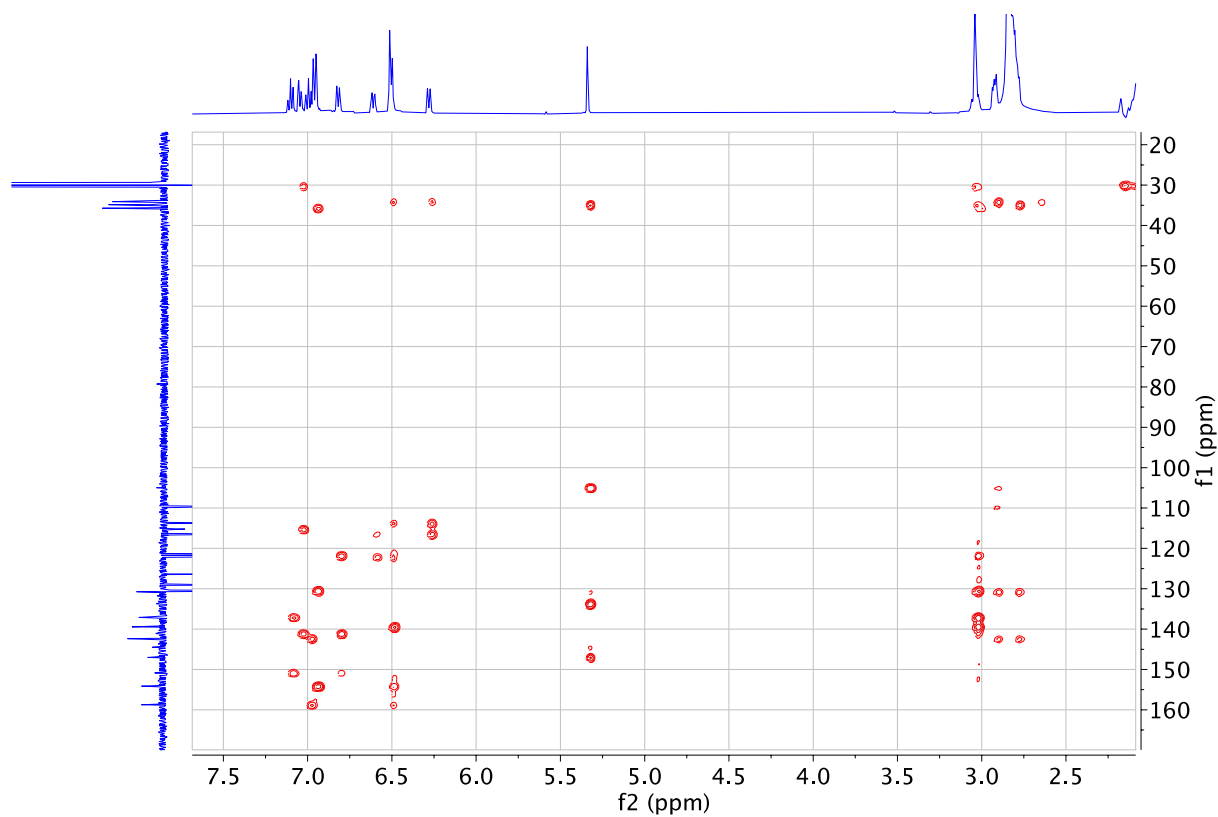

**Figure S-18D.** The HMBC spectrum of **1a** in acetone- $d_6$ .

### General procedure to synthesize compound **1a**

In 1.0 mL of mixture of acetic acid, marchantin A (**1** 6.0 mg, 0.014 mmol) and sodium bromide (14.0 mg, 0.136 mmol) were dissolved at 80°C. 0.36 mL of 30% hydrogen peroxide (0.86 mmol) was added to the reaction mixture. The reaction was conducted for 2 hours. The resulting solution was neutralized with saturated sodium hydrogen carbonate, then extracted with ethyl acetate-water (1:1, v/v) to gain an organic layer. This layer was subsequently washed with brine three times, then dried and applied to silica gel CC, eluted with n-hexane-EtOAc (4:1, v/v) to obtain **1a** (4.45 mg, 43%).

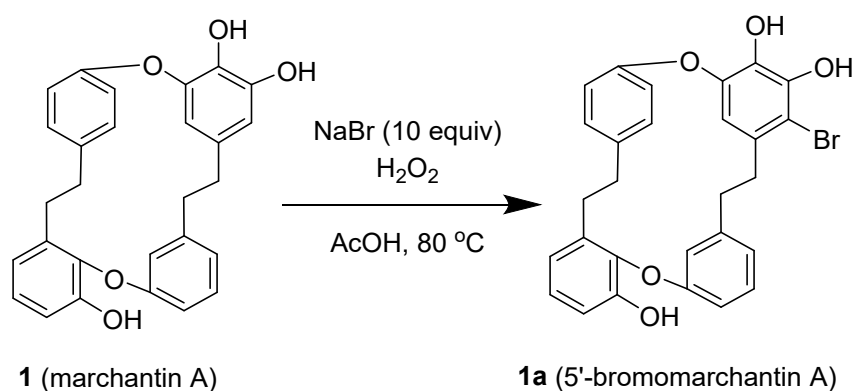

**Scheme S-1.** General procedure to synthesize compound **1a**
